# Supplementary material for: Elucidation of the Host Bronchial Lymph Node miRNA Transcriptome Response to Bovine Respiratory Syncytial Virus
Source: Front Genet. 2021 Apr 22;12:633125. doi: 10.3389/fgene.2021.633125 (PMC8100685; doi:10.3389/fgene.2021.633125)
Supplement: Supplementary Table 8 — Enriched diseases and functions among the DE predicted target genes with inverse fold changes to that of the DE miRNA. [file Table_8.XLSX]

## Sheet: DEG_targets_inverse_relationshi
Supplementary Table 8. Enriched diseases and functions among the DE predicted target genes with inverse fold changes to that of the DE miRNA.
Â© 2000-2019 QIAGEN. All rights reserved.
Categories	Function	Diseases or Functions Annotation	p-value	B-H p-value	Predicted Activation State	Activation z-score	Bias-corrected z-score	Molecules	# Molecules
Cancer,Organismal Injury and Abnormalities	non-hematological solid tumor	Non-hematological solid tumor	1.89e-20	1.44e-16		0.315	0.355	ABCB1,ACHE,ADAMTS1,ADAMTS4,ADAMTS5,ADAMTSL2,AGBL3,AGMAT,AICDA,AK2,ALDH18A1,ALOX15,ALPK3,ALPL,ANK1,ANKRD22,ANXA1,ANXA2,APOD,APOE,AQP3,ART5,ASGR2,ASPHD2,ATP2A1,B3GNT7,BAG2,BAK1,BATF2,BCL6,BCL7A,BHLHA15,BPIFB3,BRI3BP,BTNL9,BYSL,C16orf45,C1QBP,C1QTNF6,C3,C4orf19,C6,CA8,CCDC86,CCKAR,CCL17,CCL19,CCL22,CCL8,CCNA2,CCNB1,CCNE1,CCR10,CCR4,CCT5,CCT6A,CDC20,CDC25A,CDC25C,CDC6,CDH10,CDT1,CELA1,CEMIP,CENPK,CEN…	400
Cancer,Organismal Injury and Abnormalities	neoplasia	Epithelial neoplasm	2.47e-20	1.44e-16		0.409	0.482	ABCB1,ACHE,ADAMTS1,ADAMTS4,ADAMTS5,ADAMTSL2,AGBL3,AGMAT,AICDA,AK2,ALDH18A1,ALOX15,ALPK3,ALPL,ANK1,ANKRD22,ANXA1,ANXA2,APOD,APOE,ART5,ASGR2,ASPHD2,ATP2A1,B3GNT7,BAG2,BAK1,BATF2,BCL6,BCL7A,BHLHA15,BPIFB3,BTNL9,BYSL,C16orf45,C1QBP,C1QTNF6,C3,C4orf19,C6,CA8,CCDC86,CCKAR,CCL17,CCL19,CCL22,CCL8,CCNA2,CCNB1,CCNE1,CCR10,CCR4,CCT5,CCT6A,CDC20,CDC25A,CDC25C,CDC6,CDH10,CDT1,CELA1,CEMIP,CENPK,CENPP,CENPW,CHS…	396
Cancer,Organismal Injury and Abnormalities	non-melanoma solid tumor	Non-melanoma solid tumor	9.03e-20	3.52e-16		0.193	0.235	ABCB1,ACHE,ADAMTS1,ADAMTS4,ADAMTS5,ADAMTSL2,AGBL3,AGMAT,AICDA,AK2,ALDH18A1,ALOX15,ALPK3,ALPL,ANK1,ANKRD22,ANXA1,ANXA2,APOD,APOE,ART5,ASGR2,ASPHD2,ATP2A1,B3GNT7,BAG2,BAK1,BATF2,BCL6,BCL7A,BHLHA15,BPIFB3,BTNL9,BYSL,C16orf45,C1QBP,C1QTNF6,C3,C4orf19,C6,CA8,CCDC86,CCKAR,CCL17,CCL19,CCL22,CCL8,CCNA2,CCNB1,CCNE1,CCR10,CCR4,CCT5,CCT6A,CDC20,CDC25A,CDC25C,CDC6,CDH10,CDT1,CELA1,CEMIP,CENPK,CENPP,CENPW,CHS…	397
Cancer,Organismal Injury and Abnormalities	nonhematologic malignant neoplasm	Nonhematologic malignant neoplasm	1.35e-19	3.94e-16		0.693	0.709	ABCB1,ACHE,ADAMTS1,ADAMTS4,ADAMTS5,ADAMTSL2,AGBL3,AGMAT,AICDA,AK2,ALDH18A1,ALOX15,ALPK3,ALPL,ANK1,ANKRD22,ANXA1,ANXA2,APOD,APOE,AQP3,ART5,ASGR2,ASPHD2,ATP2A1,B3GNT7,BAG2,BAK1,BATF2,BCL6,BCL7A,BHLHA15,BPIFB3,BRI3BP,BTNL9,BYSL,C16orf45,C1QBP,C1QTNF6,C3,C4orf19,C6,CA8,CCDC86,CCKAR,CCL17,CCL19,CCL22,CCL8,CCNA2,CCNB1,CCNE1,CCR10,CCR4,CCT5,CCT6A,CDC20,CDC25A,CDC25C,CDC6,CDH10,CDT1,CELA1,CENPK,CENPP,CEN…	398
Cancer,Organismal Injury and Abnormalities	carcinoma	Carcinoma	2.86e-19	6.69e-16		1.393	1.433	ABCB1,ACHE,ADAMTS1,ADAMTS4,ADAMTS5,ADAMTSL2,AGBL3,AGMAT,AICDA,AK2,ALDH18A1,ALOX15,ALPK3,ALPL,ANK1,ANKRD22,ANXA1,ANXA2,APOD,APOE,ART5,ASGR2,ASPHD2,ATP2A1,B3GNT7,BAG2,BAK1,BATF2,BCL6,BCL7A,BHLHA15,BPIFB3,BTNL9,BYSL,C16orf45,C1QBP,C1QTNF6,C3,C4orf19,C6,CA8,CCDC86,CCKAR,CCL17,CCL19,CCL22,CCL8,CCNA2,CCNB1,CCNE1,CCR10,CCR4,CCT5,CCT6A,CDC20,CDC25A,CDC25C,CDC6,CDH10,CDT1,CELA1,CENPK,CENPP,CENPW,CHST1,CIS…	394
Cancer,Organismal Injury and Abnormalities	extracranial solid tumor	Extracranial solid tumor	1.34e-18	2.61e-15		-0.138	-0.116	ABCB1,ACHE,ADAMTS1,ADAMTS4,ADAMTS5,ADAMTSL2,AGBL3,AGMAT,AICDA,AK2,ALDH18A1,ALOX15,ALPK3,ALPL,ANK1,ANKRD22,ANXA1,ANXA2,APOD,APOE,AQP3,ART5,ASGR2,ASPHD2,ATP2A1,B3GNT7,BAG2,BAK1,BATF2,BCL6,BCL7A,BHLHA15,BPIFB3,BRI3BP,BTNL9,BYSL,C16orf45,C1QBP,C1QTNF6,C3,C4orf19,C6,CA8,CCDC86,CCKAR,CCL17,CCL19,CCL22,CCL8,CCNA2,CCNB1,CCNE1,CCR10,CCR4,CCT5,CCT6A,CDC20,CDC25A,CDC25C,CDC6,CDH10,CDT1,CELA1,CEMIP,CENPK,CEN…	401
Cancer,Organismal Injury and Abnormalities	abdominal carcinoma	Abdominal carcinoma	2.11e-18	3.52e-15		1.412	1.48	ABCB1,ACHE,ADAMTS1,ADAMTS4,ADAMTS5,ADAMTSL2,AGBL3,AICDA,AK2,ALDH18A1,ALOX15,ALPK3,ALPL,ANK1,ANKRD22,ANXA1,ANXA2,APOD,APOE,ART5,ASGR2,ASPHD2,ATP2A1,B3GNT7,BAG2,BAK1,BATF2,BCL6,BHLHA15,BPIFB3,BTNL9,BYSL,C16orf45,C1QBP,C1QTNF6,C3,C4orf19,C6,CA8,CCDC86,CCKAR,CCL19,CCL22,CCL8,CCNA2,CCNB1,CCNE1,CCR10,CCR4,CCT5,CCT6A,CDC20,CDC25A,CDC25C,CDC6,CDH10,CDT1,CELA1,CENPK,CENPP,CHST1,CKAP4,CKS2,CLDN1,CLDN11,CLD…	370
Cancer,Organismal Injury and Abnormalities	malignant solid tumor	Malignant solid tumor	8.77e-18	1.28e-14		-0.29	-0.301	ABCB1,ACHE,ADAMTS1,ADAMTS4,ADAMTS5,ADAMTSL2,AGBL3,AGMAT,AICDA,AK2,ALDH18A1,ALOX15,ALPK3,ALPL,ANK1,ANKRD22,ANXA1,ANXA2,APOD,APOE,AQP3,ART5,ASGR2,ASPHD2,ATP2A1,B3GNT7,BAG2,BAK1,BATF2,BCL6,BCL7A,BHLHA15,BPIFB3,BRI3BP,BTNL9,BYSL,C16orf45,C1QBP,C1QTNF6,C3,C4orf19,C6,CA8,CCDC86,CCKAR,CCL17,CCL19,CCL22,CCL8,CCNA2,CCNB1,CCNE1,CCR10,CCR4,CCT5,CCT6A,CDC20,CDC25A,CDC25C,CDC6,CDH10,CDT1,CELA1,CEMIP,CENPK,CEN…	400
Cancer,Gastrointestinal Disease,Organismal Injury and Abnormalities	digestive organ tumor	Digestive organ tumor	5.31e-17	6.9e-14		1.169	1.27	ABCB1,ACHE,ADAMTS1,ADAMTS4,ADAMTS5,ADAMTSL2,AGBL3,AICDA,AK2,ALDH18A1,ALOX15,ALPK3,ALPL,ANK1,ANKRD22,ANXA1,ANXA2,APOD,APOE,AQP3,ART5,ASPHD2,ATP2A1,B3GNT7,BAG2,BAK1,BATF2,BCL6,BHLHA15,BPIFB3,BTNL9,BYSL,C16orf45,C1QBP,C1QTNF6,C3,C4orf19,C6,CCDC86,CCKAR,CCL19,CCL22,CCL8,CCNA2,CCNB1,CCNE1,CCR10,CCR4,CCT5,CCT6A,CDC20,CDC25A,CDC25C,CDC6,CDH10,CDT1,CELA1,CEMIP,CENPK,CENPP,CHST1,CKAP4,CKS2,CLDN1,CLDN11,CL…	365
Cancer,Organismal Injury and Abnormalities	abdominal neoplasm	Abdominal neoplasm	7.76e-17	9.08e-14		1.164	1.232	ABCB1,ACHE,ADAMTS1,ADAMTS4,ADAMTS5,ADAMTSL2,AGBL3,AICDA,AK2,ALDH18A1,ALOX15,ALPK3,ALPL,ANK1,ANKRD22,ANXA1,ANXA2,APOD,APOE,AQP3,ART5,ASGR2,ASPHD2,ATP2A1,B3GNT7,BAG2,BAK1,BATF2,BCL6,BHLHA15,BPIFB3,BTNL9,BYSL,C16orf45,C1QBP,C1QTNF6,C3,C4orf19,C6,CA8,CCDC86,CCKAR,CCL19,CCL22,CCL8,CCNA2,CCNB1,CCNE1,CCR10,CCR4,CCT5,CCT6A,CDC20,CDC25A,CDC25C,CDC6,CDH10,CDT1,CELA1,CEMIP,CENPK,CENPP,CHST1,CKAP4,CKS2,CLDN1…	378
Cancer,Organismal Injury and Abnormalities	abdominal cancer	Abdominal cancer	1.44e-16	1.53e-13		1.878	1.93	ABCB1,ACHE,ADAMTS1,ADAMTS4,ADAMTS5,ADAMTSL2,AGBL3,AICDA,AK2,ALDH18A1,ALOX15,ALPK3,ALPL,ANK1,ANKRD22,ANXA1,ANXA2,APOD,APOE,AQP3,ART5,ASGR2,ASPHD2,ATP2A1,B3GNT7,BAG2,BAK1,BATF2,BCL6,BHLHA15,BPIFB3,BTNL9,BYSL,C16orf45,C1QBP,C1QTNF6,C3,C4orf19,C6,CA8,CCDC86,CCKAR,CCL19,CCL22,CCL8,CCNA2,CCNB1,CCNE1,CCR10,CCR4,CCT5,CCT6A,CDC20,CDC25A,CDC25C,CDC6,CDH10,CDT1,CELA1,CEMIP,CENPK,CENPP,CHST1,CKAP4,CKS2,CLDN1…	374
Cancer,Gastrointestinal Disease,Organismal Injury and Abnormalities	digestive system cancer	Digestive system cancer	1.58e-16	1.54e-13	Increased	2.107	2.196	ABCB1,ACHE,ADAMTS1,ADAMTS4,ADAMTS5,ADAMTSL2,AGBL3,AICDA,AK2,ALDH18A1,ALOX15,ALPK3,ALPL,ANK1,ANKRD22,ANXA1,ANXA2,APOD,APOE,AQP3,ART5,ASPHD2,ATP2A1,B3GNT7,BAG2,BAK1,BATF2,BCL6,BPIFB3,BTNL9,BYSL,C16orf45,C1QBP,C1QTNF6,C3,C4orf19,C6,CCDC86,CCKAR,CCL19,CCL22,CCL8,CCNA2,CCNB1,CCNE1,CCR10,CCR4,CCT5,CCT6A,CDC20,CDC25A,CDC25C,CDC6,CDH10,CDT1,CELA1,CEMIP,CENPK,CENPP,CHST1,CKAP4,CKS2,CLDN1,CLDN11,CLDN3,CLEC…	359
Cancer,Organismal Injury and Abnormalities	adenocarcinoma	Adenocarcinoma	1.39e-14	1.25e-11		0.44	0.524	ABCB1,ACHE,ADAMTS1,ADAMTS4,ADAMTS5,ADAMTSL2,AGBL3,AICDA,ALDH18A1,ALOX15,ALPK3,ALPL,ANK1,ANKRD22,ANXA1,ANXA2,APOD,APOE,ART5,ASGR2,ASPHD2,ATP2A1,BAK1,BATF2,BCL6,BPIFB3,BTNL9,BYSL,C16orf45,C1QBP,C1QTNF6,C3,C4orf19,C6,CA8,CCDC86,CCKAR,CCL17,CCL22,CCL8,CCNA2,CCNB1,CCNE1,CCR10,CCR4,CCT5,CCT6A,CDC20,CDC25A,CDC25C,CDC6,CDH10,CDT1,CELA1,CENPK,CENPP,CHST1,CKAP4,CKS2,CLDN1,CLDN11,CLDN3,CLEC10A,CLEC4A,CLEC4E…	351
Cancer,Gastrointestinal Disease,Organismal Injury and Abnormalities	large intestine neoplasm	Large intestine neoplasm	7.47e-14	6.14e-11		1.432	1.475	ABCB1,ACHE,ADAMTS1,ADAMTS4,ADAMTS5,ADAMTSL2,AGBL3,AICDA,ALDH18A1,ALOX15,ALPK3,ALPL,ANK1,ANKRD22,ANXA1,ANXA2,APOD,AQP3,ART5,ASPHD2,ATP2A1,BAK1,BATF2,BCL6,BPIFB3,BTNL9,BYSL,C16orf45,C1QBP,C1QTNF6,C3,C4orf19,C6,CCDC86,CCKAR,CCL8,CCNA2,CCNB1,CCNE1,CCR10,CCR4,CCT5,CDC20,CDC25A,CDC25C,CDC6,CDH10,CDT1,CELA1,CEMIP,CENPK,CENPP,CHST1,CKAP4,CLDN1,CLDN11,CLDN3,CLEC4A,CLEC4E,CLEC4F,CLEC6A,CMPK2,CNN1,CNTN1,COL…	322
Cancer,Gastrointestinal Disease,Organismal Injury and Abnormalities	neoplasia	Gastrointestinal tumor	7.88e-14	6.14e-11		0.756	0.889	ABCB1,ACHE,ADAMTS1,ADAMTS4,ADAMTS5,ADAMTSL2,AGBL3,AICDA,ALDH18A1,ALOX15,ALPK3,ALPL,ANK1,ANKRD22,ANXA1,ANXA2,APOD,APOE,AQP3,ART5,ASPHD2,ATP2A1,BAK1,BATF2,BCL6,BPIFB3,BTNL9,BYSL,C16orf45,C1QBP,C1QTNF6,C3,C4orf19,C6,CCDC86,CCKAR,CCL19,CCL8,CCNA2,CCNB1,CCNE1,CCR10,CCR4,CCT5,CDC20,CDC25A,CDC25C,CDC6,CDH10,CDT1,CELA1,CEMIP,CENPK,CENPP,CHST1,CKAP4,CLDN1,CLDN11,CLDN3,CLEC4A,CLEC4E,CLEC4F,CLEC6A,CMPK2,CNN…	332
Cancer,Gastrointestinal Disease,Organismal Injury and Abnormalities	gastrointestinal tract cancer	Gastrointestinal tract cancer	1.75e-13	1.28e-10		1.351	1.445	ABCB1,ACHE,ADAMTS1,ADAMTS4,ADAMTS5,ADAMTSL2,AGBL3,AICDA,ALDH18A1,ALOX15,ALPK3,ALPL,ANK1,ANKRD22,ANXA1,ANXA2,APOD,APOE,AQP3,ART5,ASPHD2,ATP2A1,BAK1,BATF2,BCL6,BPIFB3,BTNL9,BYSL,C16orf45,C1QBP,C1QTNF6,C3,C4orf19,C6,CCDC86,CCKAR,CCL19,CCL8,CCNA2,CCNB1,CCNE1,CCR10,CCR4,CCT5,CDC20,CDC25A,CDC25C,CDC6,CDH10,CDT1,CELA1,CEMIP,CENPK,CENPP,CHST1,CKAP4,CLDN1,CLDN11,CLDN3,CLEC4A,CLEC4E,CLEC4F,CLEC6A,CMPK2,CNN…	330
Cancer,Gastrointestinal Disease,Organismal Injury and Abnormalities	malignant neoplasm of large intestine	Malignant neoplasm of large intestine	4.12e-13	2.84e-10		1.387	1.434	ABCB1,ACHE,ADAMTS1,ADAMTS4,ADAMTS5,ADAMTSL2,AGBL3,AICDA,ALDH18A1,ALOX15,ALPK3,ALPL,ANK1,ANKRD22,ANXA1,ANXA2,APOD,AQP3,ART5,ASPHD2,ATP2A1,BAK1,BATF2,BCL6,BPIFB3,BTNL9,BYSL,C16orf45,C1QBP,C1QTNF6,C3,C4orf19,C6,CCDC86,CCKAR,CCL8,CCNA2,CCNB1,CCNE1,CCR10,CCR4,CCT5,CDC20,CDC25A,CDC25C,CDC6,CDH10,CDT1,CELA1,CEMIP,CENPK,CENPP,CHST1,CKAP4,CLDN1,CLDN11,CLDN3,CLEC4A,CLEC4E,CLEC4F,CLEC6A,CMPK2,CNTN1,COL1A1,C…	319
Cancer,Organismal Injury and Abnormalities	abdominal adenocarcinoma	Abdominal adenocarcinoma	6.69e-13	4.34e-10				ABCB1,ACHE,ADAMTS1,ADAMTS4,ADAMTS5,ADAMTSL2,AGBL3,AICDA,ALDH18A1,ALOX15,ALPK3,ALPL,ANK1,ANKRD22,ANXA1,ANXA2,APOD,APOE,ART5,ASGR2,ASPHD2,ATP2A1,BAK1,BATF2,BCL6,BPIFB3,BTNL9,BYSL,C16orf45,C1QBP,C1QTNF6,C3,C4orf19,C6,CA8,CCDC86,CCKAR,CCL22,CCL8,CCNA2,CCNB1,CCNE1,CCR10,CCR4,CCT5,CCT6A,CDC20,CDC25A,CDC25C,CDC6,CDH10,CDT1,CELA1,CENPK,CENPP,CHST1,CKAP4,CLDN1,CLDN11,CLDN3,CLEC4A,CLEC4E,CLEC4F,CLEC6A,CMPK…	342
Inflammatory Response	inflammatory response	Inflammatory response	2.32e-12	1.43e-09		1.731	1.329	ABCB1,ACHE,ALOX15,ANXA1,ANXA2,APOE,BCL6,C1QBP,C3,C6,CCL17,CCL19,CCL22,CCL8,CCR10,CCR4,CELA1,CLEC4A,CLEC4E,CXCL10,CXCL11,F2,FABP4,FNDC4,HSPD1,IFNG,IL27,LBP,LIF,MFSD2A,MMP7,MOG,MST1R,NPY,NTN1,NUPR1,OSM,PDK4,PGLYRP1,PTGS2,PTX3,RORA,SCG2,SDC1,SERPINF1,SLAMF8,SLC1A5,SMAD7,SOCS3,SYT7,THBS2,TREM2,TUBB3,TXN,VIPR1,VNN1,VTN,XBP1,XCL1,ZBP1	60
Cancer,Gastrointestinal Disease,Organismal Injury and Abnormalities	gastrointestinal carcinoma	Gastrointestinal carcinoma	3.41e-12	1.97e-09				ABCB1,ACHE,ADAMTS1,ADAMTS4,ADAMTS5,ADAMTSL2,AGBL3,AICDA,ALDH18A1,ALOX15,ALPK3,ALPL,ANK1,ANKRD22,ANXA1,APOD,APOE,ART5,ASPHD2,ATP2A1,BAK1,BATF2,BCL6,BPIFB3,BTNL9,BYSL,C16orf45,C1QBP,C1QTNF6,C3,C4orf19,C6,CCDC86,CCKAR,CCL8,CCNA2,CCNB1,CCNE1,CCR10,CCR4,CDC20,CDC25A,CDC25C,CDC6,CDH10,CDT1,CELA1,CENPK,CENPP,CHST1,CKAP4,CLDN1,CLDN11,CLEC4A,CLEC4E,CLEC4F,CLEC6A,CMPK2,CNN1,CNTN1,COL1A1,COL1A2,COL4A1,COL4A…	317
Cancer,Organismal Injury and Abnormalities	cancer	Cancer of secretory structure	3.54e-12	1.97e-09		0.218	0.15	ABCB1,ACHE,ADAMTS1,ADAMTS4,ADAMTS5,ADAMTSL2,AGBL3,AGMAT,AICDA,AK2,ALDH18A1,ALOX15,ALPK3,ALPL,ANK1,ANKRD22,ANXA1,ANXA2,APOD,APOE,ART5,ASGR2,ATP2A1,B3GNT7,BAG2,BAK1,BCL6,BCL7A,BHLHA15,BPIFB3,BTNL9,BYSL,C16orf45,C1QBP,C1QTNF6,C3,C4orf19,C6,CA8,CCL17,CCL22,CCNB1,CCNE1,CCR10,CCR4,CCT5,CCT6A,CDC20,CDC25C,CDC6,CDH10,CDT1,CELA1,CENPK,CENPP,CENPW,CHST1,CISD1,CKAP4,CKS2,CLDN11,CLDN3,CLEC10A,CLEC4A,CLEC4F,C…	337
Cancer,Gastrointestinal Disease,Organismal Injury and Abnormalities	large intestine carcinoma	Large intestine carcinoma	6.04e-12	3.21e-09				ABCB1,ACHE,ADAMTS1,ADAMTS4,ADAMTS5,ADAMTSL2,AGBL3,AICDA,ALDH18A1,ALOX15,ALPK3,ALPL,ANK1,ANKRD22,ANXA1,APOD,ART5,ASPHD2,ATP2A1,BAK1,BATF2,BCL6,BPIFB3,BTNL9,BYSL,C16orf45,C1QBP,C1QTNF6,C3,C4orf19,C6,CCDC86,CCKAR,CCL8,CCNA2,CCNB1,CCNE1,CCR10,CCR4,CDC20,CDC25A,CDC25C,CDC6,CDH10,CDT1,CELA1,CENPK,CENPP,CHST1,CKAP4,CLDN1,CLDN11,CLEC4A,CLEC4E,CLEC4F,CLEC6A,CMPK2,CNTN1,COL1A1,COL1A2,COL4A1,COL4A6,CPAMD8,C…	305
Connective Tissue Disorders,Inflammatory Disease,Organismal Injury and Abnormalities,Skeletal and Muscular Disorders	rheumatic disease	Rheumatic Disease	7.9e-12	4.02e-09		1.659	1.61	ABCB1,ACHE,ADAMTS1,ADAMTS4,ADAMTS5,AK2,ALOX15,ALPL,ANXA1,APOE,BAK1,BCL6,C1QTNF6,C3,C6,CCL17,CCL19,CCL22,CCL8,CCNB1,CCR4,CEMIP,CLEC4A,CLEC4E,COL1A1,COL4A6,CTSL,CXCL10,CXCL11,DUSP5,EIF2AK2,FABP4,FMOD,FRZB,GABRD,GBP6,GINS2,GRIK4,GZMA,GZMB,HCAR3,HERC5,HLA-DQB1,HSPA5,HSPD1,IFIT1,IFIT3,IFNG,IL18BP,LBP,LRFN1,MAML3,MMP7,NAMPT,NPY,OAS1,OAS2,OSM,PGLYRP1,PTGS2,PTX3,RET,SCG2,SDC1,SDC3,SLC1A2,SNAP25,SOCS3,TBX…	82
Inflammatory Disease	chronic inflammatory disorder	Chronic inflammatory disorder	1.92e-11	9.34e-09		1.937	2.023	ABCB1,ACHE,ADAMTS4,AK2,ALOX15,ALPL,ANK1,ANXA1,APOE,ASPHD2,BCL6,C16orf45,C1QTNF6,C3,CCL17,CCL19,CCL22,CCL8,CCNB1,CCR10,CCR4,CEMIP,CLEC4A,CLEC4E,COL1A1,COL1A2,COL4A6,CTSL,CXCL10,CYP1A1,DRC1,DSC1,F2,FABP4,FRZB,GABRD,GBP6,GINS2,GRIK4,GZMA,GZMB,HLA-DQB1,HSPA5,HSPD1,IFNG,IL18BP,LBP,LRFN1,MAML3,NAMPT,OSM,P4HB,PGLYRP1,PTGS2,RET,RTKN2,SDC1,SDC3,SLC1A2,SMAD7,SNAP25,SOCS3,STRA6,TF,TGFA,TMEM266,TNFSF10,TRAM2…	74
Connective Tissue Disorders,Organismal Injury and Abnormalities,Skeletal and Muscular Disorders	non-traumatic arthropathy	Non-traumatic arthropathy	2.43e-11	1.13e-08				ABCB1,ACHE,ADAMTS1,ADAMTS4,ADAMTS5,AK2,ALOX15,ALPL,ANXA1,APOE,BCL6,C1QTNF6,C3,CCL17,CCL19,CCL22,CCL8,CCNB1,CCR4,CEMIP,CLEC4A,CLEC4E,COL4A6,CXCL10,FABP4,FMOD,FRZB,GABRD,GBP6,GINS2,GRIK4,GZMA,GZMB,HLA-DQB1,HSPD1,IFNG,IL18BP,LBP,LRFN1,MAML3,MMP7,NAMPT,OSM,PGLYRP1,PTGS2,PTX3,SDC1,SDC3,SLC1A2,SNAP25,SOCS3,TF,TGFA,TMEM266,TNFSF10,TRAM2,TUBB3,TXN,VIPR1,XBP1,XCL1	61
Cellular Movement	cell movement	Cell movement of blood cells	2.77e-11	1.25e-08		0.608	0.031	ALOX15,ANXA1,ANXA2,APOE,AQP3,BCL6,C1QBP,C1QTNF6,C3,C6,CCL17,CCL19,CCL22,CCL8,CCR10,CCR4,CHST1,CLEC10A,CLEC4E,COL1A1,COL1A2,COL4A1,CXCL10,CXCL11,CYP1A1,EDIL3,F2,FABP4,GZMB,HSPA5,HSPD1,IFNG,IL18BP,JCHAIN,LBP,LIF,MMP7,MOG,NPY,NR3C2,NTN1,OLFM4,OSM,P2RY1,PDK4,PGLYRP1,PTGS2,PTX3,SCG2,SDC1,SDC3,SERPINF1,SLAMF8,SLC16A1,SLC7A5,SMAD7,SOCS3,TBX21,THBS2,TNFRSF8,TNFSF10,TREM2,TXN,VCAN,VIPR1,VTN,XCL1	67
Inflammatory Response,Organismal Injury and Abnormalities	inflammation	Inflammation of organ	3.72e-11	1.61e-08		-0.426	-0.093	ABCB1,ALOX15,ANXA1,APOE,BAK1,BCL6,C3,C6,CCL17,CCL22,CCL8,CCNA2,CCR10,CCR4,CDC25A,CGAS,CLEC4A,CLEC4E,COL1A1,COL1A2,COL4A1,CPNE7,CTSL,CXCL10,CXCL11,CYP1A1,DSC1,DUSP5,EIF2AK2,F2,FABP4,FKBP4,FNDC4,GABRD,GZMA,GZMB,HERC5,HLA-DQB1,HSPA5,IFNG,IL12RB2,IL18BP,IL27,IRF4,JCHAIN,KEL,LBP,LIF,MMP7,MOG,NPY,NR3C2,OLFM4,OSM,P4HB,PDK4,PGLYRP1,PHB,PTGS2,RET,RORA,RTKN2,S100A11,SDC1,SHMT2,SMAD7,SOCS3,STRA6,TBX21,TF,TG…	85
Cellular Movement	cell movement	Cell movement of myeloid cells	8.02e-11	3.35e-08		0.438	-0.043	ALOX15,ANXA1,ANXA2,APOE,BCL6,C1QBP,C1QTNF6,C3,C6,CCL17,CCL19,CCL22,CCL8,COL1A1,COL4A1,CXCL10,CXCL11,EDIL3,F2,FABP4,HSPA5,IFNG,LBP,MMP7,MOG,NR3C2,NTN1,OLFM4,OSM,PDK4,PTGS2,PTX3,SCG2,SDC1,SERPINF1,SLAMF8,SMAD7,SOCS3,TBX21,THBS2,TREM2,TXN,VCAN,VIPR1,VTN,XCL1	46
Cellular Movement,Immune Cell Trafficking	migration	Leukocyte migration	1.31e-10	5.26e-08		0.565	0.001	ALOX15,ANXA1,ANXA2,APOE,AQP3,BCL6,C1QBP,C1QTNF6,C3,C6,CCL17,CCL19,CCL22,CCL8,CCR10,CCR4,CHST1,CLEC10A,CLEC4E,COL1A1,COL1A2,COL4A1,CXCL10,CXCL11,CYP1A1,EDIL3,F2,FABP4,HSPA5,HSPD1,IFNG,IL18BP,JCHAIN,LBP,LIF,MMP7,MOG,NPY,NR3C2,NTN1,OLFM4,OSM,PDK4,PGLYRP1,PTGS2,PTX3,SCG2,SDC1,SDC3,SERPINF1,SLAMF8,SLC16A1,SLC7A5,SMAD7,SOCS3,TBX21,THBS2,TNFRSF8,TNFSF10,TREM2,TXN,VCAN,VIPR1,VTN,XCL1	65
Connective Tissue Disorders,Inflammatory Disease,Inflammatory Response,Organismal Injury and Abnormalities,Skeletal and Muscular Disorders	inflammation	Inflammation of joint	1.35e-10	5.26e-08		1.446	1.357	ABCB1,ACHE,ADAMTS1,ADAMTS4,ADAMTS5,AK2,ALOX15,ALPL,ANXA1,APOE,BCL6,C1QTNF6,C3,C6,CCL17,CCL19,CCL22,CCL8,CCNB1,CCR4,CEMIP,CLEC4A,CLEC4E,COL4A6,CXCL10,FABP4,FMOD,FRZB,GABRD,GBP6,GINS2,GRIK4,GZMA,GZMB,HLA-DQB1,HSPA5,HSPD1,IFNG,IL18BP,LBP,LRFN1,MAML3,MMP7,NAMPT,NPY,OSM,PGLYRP1,PTGS2,PTX3,RET,SDC1,SDC3,SLC1A2,SNAP25,SOCS3,TBX21,TF,TGFA,THBS2,TMEM266,TNFSF10,TRAM2,TUBB3,TXN,VIPR1,XBP1,XCL1	67
Cancer,Gastrointestinal Disease,Organismal Injury and Abnormalities	gastrointestinal adenocarcinoma	Gastrointestinal adenocarcinoma	1.5e-10	5.67e-08				ABCB1,ACHE,ADAMTS1,ADAMTS4,ADAMTS5,ADAMTSL2,AGBL3,AICDA,ALDH18A1,ALOX15,ALPK3,ALPL,ANK1,ANKRD22,ANXA1,APOD,ART5,ASPHD2,ATP2A1,BAK1,BATF2,BCL6,BPIFB3,BTNL9,BYSL,C16orf45,C1QBP,C1QTNF6,C3,C4orf19,C6,CCDC86,CCKAR,CCL8,CCNB1,CCNE1,CCR10,CCR4,CDC20,CDC25A,CDC25C,CDC6,CDH10,CDT1,CELA1,CENPK,CENPP,CHST1,CKAP4,CLDN1,CLDN11,CLEC4A,CLEC4E,CLEC4F,CLEC6A,CMPK2,CNTN1,COL1A1,COL1A2,COL4A1,COL4A6,CPAMD8,CPNE7,C…	304
Cancer,Gastrointestinal Disease,Organismal Injury and Abnormalities	large intestine adenocarcinoma	Large intestine adenocarcinoma	2.9e-10	1.06e-07				ABCB1,ACHE,ADAMTS1,ADAMTS4,ADAMTS5,ADAMTSL2,AGBL3,AICDA,ALDH18A1,ALOX15,ALPK3,ALPL,ANK1,ANKRD22,ANXA1,APOD,ART5,ASPHD2,ATP2A1,BAK1,BATF2,BCL6,BPIFB3,BTNL9,BYSL,C16orf45,C1QBP,C1QTNF6,C3,C4orf19,C6,CCDC86,CCKAR,CCL8,CCNB1,CCNE1,CCR10,CCR4,CDC20,CDC25A,CDC25C,CDC6,CDH10,CDT1,CELA1,CENPK,CENPP,CHST1,CKAP4,CLDN1,CLDN11,CLEC4A,CLEC4E,CLEC4F,CLEC6A,CMPK2,CNTN1,COL1A1,COL1A2,COL4A1,COL4A6,CPAMD8,CPNE7,C…	298
Organismal Injury and Abnormalities	benign lesion	Benign lesion	3.87e-10	1.37e-07		-0.07	0.208	ABCB1,ACHE,AK2,ALOX15,ANXA1,ANXA2,ATP2A1,BAK1,BYSL,C3,CCKAR,CCNB1,CCNE1,CEMIP,CLDN11,COL1A1,COL1A2,COL4A1,COL4A6,DUSP5,FABP4,FMOD,IFIT1,IFIT3,IFNG,ISLR,JCHAIN,LAMB3,MMP7,MST1R,MYBL1,NR3C2,NTMT1,PDK4,PKHD1,PPA1,PTGS2,RET,RNASE1,RORA,S100A11,SCG2,SDC1,SKA3,SLC23A1,SLC7A5,SNAP25,SOCS3,SORD,STMN2,STX1A,TGFA,THBS2,TNFSF10,TPBG,TRAM2,TRPM8,TUBB3,UBE2S,UNC13A,VCAN,VTN	62
Connective Tissue Disorders,Immunological Disease,Inflammatory Disease,Inflammatory Response,Organismal Injury and Abnormalities,Skeletal and Muscular Disorders	rheumatoid arthritis	Rheumatoid arthritis	4.42e-10	1.52e-07				ABCB1,ACHE,ADAMTS4,AK2,ALOX15,ALPL,ANXA1,APOE,BCL6,C1QTNF6,C3,CCL17,CCL19,CCL22,CCL8,CCNB1,CCR4,CEMIP,CLEC4A,CLEC4E,COL4A6,CXCL10,FABP4,FRZB,GABRD,GBP6,GINS2,GRIK4,GZMA,GZMB,HLA-DQB1,HSPD1,IFNG,IL18BP,LBP,LRFN1,MAML3,NAMPT,OSM,PGLYRP1,PTGS2,SDC1,SDC3,SLC1A2,SOCS3,TGFA,TMEM266,TNFSF10,TRAM2,TXN,VIPR1,XBP1,XCL1	53
Cellular Movement,Hematological System Development and Function,Immune Cell Trafficking	cell movement	Cell movement of leukocytes	4.84e-10	1.62e-07		0.398	-0.149	ALOX15,ANXA1,ANXA2,APOE,AQP3,BCL6,C1QBP,C1QTNF6,C3,C6,CCL17,CCL19,CCL22,CCL8,CCR10,CCR4,CHST1,COL1A1,COL4A1,CXCL10,CXCL11,EDIL3,F2,FABP4,HSPA5,HSPD1,IFNG,IL18BP,LBP,MMP7,MOG,NPY,NR3C2,NTN1,OLFM4,OSM,PDK4,PGLYRP1,PTGS2,PTX3,SCG2,SDC1,SERPINF1,SLAMF8,SMAD7,SOCS3,TBX21,THBS2,TNFRSF8,TNFSF10,TREM2,TXN,VCAN,VIPR1,VTN,XCL1	56
Immunological Disease	systemic autoimmune syndrome	Systemic autoimmune syndrome	6.99e-10	2.27e-07		1.023	1.001	ABCB1,ACHE,ADAMTS4,AK2,ALOX15,ALPL,ANXA1,APOE,BAK1,BCL6,C1QTNF6,C3,CCL17,CCL19,CCL22,CCL8,CCNB1,CCR4,CEMIP,CLEC4A,CLEC4E,CLEC6A,COL1A2,COL4A1,COL4A6,CUX2,CXCL10,CXCL11,DUSP5,EIF2AK2,FABP4,FRZB,GABRD,GBP6,GINS2,GRIK4,GZMA,GZMB,HCAR3,HERC5,HLA-DQB1,HSPD1,IFIT1,IFIT3,IFNG,IL18BP,IRF4,LBP,LGR6,LRFN1,MAML3,MOG,MYBL1,NAMPT,NPHS1,OAS1,OAS2,OSM,PGLYRP1,PTGS2,RET,RTP4,SCG2,SDC1,SDC3,SLC1A2,SOCS3,TGFA,TMEM…	77
Cancer,Organismal Injury and Abnormalities	head and neck neoplasia	Head and neck tumor	8.57e-10	2.71e-07		1.276	1.35	ABCB1,ACHE,ADAMTS1,ADAMTS4,ADAMTS5,ADAMTSL2,AGMAT,AICDA,AK2,ALDH18A1,ALOX15,ALPK3,ANK1,ANKRD22,ANXA1,ANXA2,APOD,APOE,ART5,ASGR2,ATP2A1,B3GNT7,BAG2,BAK1,BCL6,BCL7A,BHLHA15,BPIFB3,BRI3BP,BTNL9,BYSL,C16orf45,C1QBP,C1QTNF6,C3,C4orf19,C6,CA8,CCDC86,CCL17,CCL19,CCL8,CCNB1,CCNE1,CCR10,CCT5,CCT6A,CDC20,CDC6,CDH10,CDT1,CELA1,CENPK,CENPP,CENPW,CHST1,CISD1,CKAP4,CKS2,CLDN11,CLDN3,CLEC10A,CLEC4A,CMPK2,CNN1,C…	320
Cancer,Organismal Injury and Abnormalities	benign solid tumor	Benign solid tumor	1.08e-09	3.34e-07		-1.164	-0.971	ABCB1,ACHE,AK2,ALOX15,ANXA1,ANXA2,ATP2A1,BAK1,BYSL,C3,CCKAR,CCNB1,CCNE1,CEMIP,CLDN11,COL1A1,COL1A2,COL4A1,COL4A6,DUSP5,FABP4,FMOD,IFIT1,IFIT3,IFNG,ISLR,JCHAIN,LAMB3,MMP7,MST1R,MYBL1,NR3C2,NTMT1,PDK4,PPA1,PTGS2,RET,RNASE1,RORA,S100A11,SCG2,SKA3,SLC7A5,SOCS3,SORD,STMN2,STX1A,TGFA,THBS2,TNFSF10,TPBG,TRAM2,TUBB3,UBE2S,VCAN,VTN	56
Cellular Movement,Hematological System Development and Function,Immune Cell Trafficking,Inflammatory Response	cell movement	Cell movement of phagocytes	1.24e-09	3.7e-07		-0.594	-1.122	ALOX15,ANXA1,ANXA2,APOE,BCL6,C1QBP,C1QTNF6,C3,C6,CCL17,CCL19,CCL22,CCL8,COL1A1,COL4A1,CXCL10,CXCL11,EDIL3,F2,FABP4,HSPA5,IFNG,LBP,MMP7,MOG,NPY,NR3C2,NTN1,PDK4,PTGS2,PTX3,SCG2,SDC1,SERPINF1,SLAMF8,SMAD7,SOCS3,THBS2,TREM2,TXN,VCAN,VIPR1,VTN,XCL1	44
Cellular Movement	cell movement	Cell movement	1.29e-09	3.78e-07		1.974	1.251	ADAMTS1,ADAMTS5,ALOX15,ANXA1,ANXA2,APOE,AQP3,BCL6,C1QBP,C1QTNF6,C3,C6,CCKAR,CCL17,CCL19,CCL22,CCL8,CCNA2,CCR10,CCR4,CEMIP,CHST1,CLDN1,CLDN11,CLDN3,CLEC10A,CLEC4E,CNN1,CNTN1,COL1A1,COL1A2,COL4A1,CTSL,CXCL10,CXCL11,CYP1A1,DMP1,DRAM1,DTL,DUSP5,EDIL3,EIF2AK2,F2,FABP4,FAIM2,FKBP4,FMOD,FST,GFRA3,GZMB,HAS2,HSP90AA1,HSPA5,HSPD1,IFNG,IL18BP,JCHAIN,KIRREL3,LAMB3,LBP,LGR6,LIF,MCM2,MMP7,MOG,MOV10L1,MST1R,MYB…	117
Cellular Function and Maintenance	homeostasis	Cellular homeostasis	1.6e-09	4.55e-07		1.252	0.774	ACHE,ADAMTS1,ALOX15,ANK1,ANXA1,ANXA2,APOE,AQP3,ATP2A1,BAK1,BCL6,BHLHA15,C3,CCKAR,CCL17,CCL19,CCL22,CCL8,CCR10,CISD1,CLDN1,CLEC4E,CLEC6A,COL4A1,CTSL,CXCL10,DLGAP1,DMP1,DRAM1,EIF2AK2,EIF5A,F2,FABP4,FGF23,GRIK3,GZMA,GZMB,HLA-DQB1,HSP90AA1,HSPA5,HSPD1,IFNG,IL12RB2,IL27,IRF4,KEL,LIF,MCHR1,MOG,NAMPT,NMUR2,NPY,NR3C2,NUPR1,OAS1,OSM,P2RY1,PDK4,PHB,PKHD1,PTGS2,PYCR1,RIMS3,RNASE1,RORA,SERPINF1,SERPINH1,SLC1…	89
Cell Death and Survival	necrosis	Necrosis	1.72e-09	4.8e-07		-0.688	-0.473	ABCB1,ACHE,ADAMTS1,AICDA,ALOX15,ANXA1,ANXA2,APOE,ATP2A1,BAK1,BCL6,C3,CCDC86,CCL19,CCNB1,CCNE1,CCT5,CCT6A,CDC20,CDC25A,CDC25C,CDC6,CDT1,CELA1,CKS2,CLEC10A,COL1A1,COL4A1,CXCL10,CXCL11,DDN,DMP1,DRAM1,DTL,DUSP5,EDIL3,EIF2AK2,EIF5A,F2,FABP3,FABP4,FAIM2,FKBP4,FMOD,FRZB,FST,GABRD,GFRA2,GFRA3,GP2,GZMA,GZMB,HAS2,HK2,HLA-DQB1,HSP90AA1,HSPA5,HSPD1,HSPH1,IFNG,IL27,IRF4,ISM1,LARP1B,LBP,LIF,MANF,MCM10,MCM2,MMP…	129
Cancer,Organismal Injury and Abnormalities	head and neck cancer	Head and neck cancer	1.96e-09	5.33e-07				ABCB1,ACHE,ADAMTS1,ADAMTS4,ADAMTS5,ADAMTSL2,AGMAT,AICDA,AK2,ALDH18A1,ALOX15,ALPK3,ANK1,ANKRD22,ANXA1,ANXA2,APOD,APOE,ART5,ASGR2,ATP2A1,B3GNT7,BAG2,BAK1,BCL6,BCL7A,BHLHA15,BPIFB3,BTNL9,BYSL,C16orf45,C1QBP,C1QTNF6,C3,C4orf19,C6,CA8,CCDC86,CCL17,CCL19,CCL8,CCNB1,CCNE1,CCR10,CCT5,CCT6A,CDC20,CDC6,CDH10,CDT1,CELA1,CENPK,CENPP,CENPW,CHST1,CISD1,CKAP4,CKS2,CLDN11,CLDN3,CLEC10A,CLEC4A,CMPK2,CNN1,CNTN1,CO…	316
Cancer,Organismal Injury and Abnormalities	head and neck carcinoma	Head and neck carcinoma	3.05e-09	8.12e-07				ABCB1,ACHE,ADAMTS1,ADAMTS4,ADAMTS5,ADAMTSL2,AGMAT,AICDA,AK2,ALDH18A1,ALOX15,ALPK3,ANK1,ANKRD22,ANXA1,ANXA2,APOD,APOE,ART5,ASGR2,ATP2A1,B3GNT7,BAG2,BAK1,BCL6,BCL7A,BHLHA15,BPIFB3,BTNL9,BYSL,C16orf45,C1QBP,C1QTNF6,C3,C4orf19,C6,CA8,CCDC86,CCL17,CCL8,CCNB1,CCNE1,CCR10,CCT5,CCT6A,CDC20,CDC6,CDH10,CDT1,CELA1,CENPK,CENPP,CENPW,CHST1,CISD1,CKAP4,CKS2,CLDN11,CLDN3,CLEC10A,CLEC4A,CMPK2,CNN1,CNTN1,COL1A1,C…	314
Inflammatory Response	inflammation	Inflammation of absolute anatomical region	3.52e-09	9.15e-07		-0.342	-0.007	ABCB1,ALOX15,ANXA1,APOE,BAK1,BCL6,C3,C6,CCL17,CCL22,CCL8,CCR10,CCR4,CGAS,CLEC4A,CLEC4E,COL1A1,COL1A2,COL4A1,CTSL,CXCL10,CXCL11,CYP1A1,DUSP5,F2,FNDC4,GABRD,GZMA,GZMB,HERC5,HLA-DQB1,HSPA5,IFNG,IL12RB2,IL18BP,IL27,IRF4,LBP,LIF,MMP7,MOG,NPY,NR3C2,NTN1,OLFM4,OSM,P4HB,PHB,PTGS2,RET,RORA,RTKN2,SDC1,SHMT2,SMAD7,SOCS3,STRA6,TBX21,TF,TGFA,THBS2,TK1,TKTL1,TNFSF10,TRAM2,TREM2,TRPM8,TXN,UBA7,VNN1,XBP1,XCL1	72
Cell Signaling,Molecular Transport,Vitamin and Mineral Metabolism	quantity	Quantity of Ca2+	4.33e-09	1.08e-06		0.008	-0.542	ANXA2,APOE,ATP2A1,C1QBP,C3,CCKAR,CCL17,CCL19,CCL22,CCL8,CCR10,CCR4,CXCL10,CXCL11,ENTPD2,F2,FABP4,FGF23,HSP90AA1,HSPA5,IFNG,MCHR1,NMUR1,NMUR2,NPHS1,NPY,OSM,P2RY1,PTGS2,TFEC,TGFA,TOR2A,TRPM8	33
Dermatological Diseases and Conditions,Organismal Injury and Abnormalities	psoriasis	Psoriasis	4.34e-09	1.08e-06				ANXA1,ANXA2,APOD,APOE,AQP3,C1QBP,C3,CCT5,CNN1,COL1A2,CTSL,CXCL10,CXCL11,CYP1A1,EIF5A,ELL2,FRZB,GZMB,HSPA5,HSPH1,IFIT1,IFIT3,IFNG,IL27,MALL,MANF,NAMPT,OAS1,OAS2,OSM,P4HB,PHB,PTGS2,RGS20,RTP4,S100A11,SLC16A1,SOCS3,TF,TGFA,VNN1	41
Molecular Transport	quantity	Quantity of metal	4.5e-09	1.09e-06		-0.389	-0.86	ADAMTS1,ANXA2,APOE,ATP2A1,C1QBP,C3,CCKAR,CCL17,CCL19,CCL22,CCL8,CCR10,CCR4,CISD1,CXCL10,CXCL11,ENTPD2,F2,FABP4,FGF23,HSP90AA1,HSPA5,IFNG,MCHR1,NMUR1,NMUR2,NPHS1,NPY,OSM,P2RY1,PTGS2,SLC40A1,SLC4A11,TF,TFEC,TGFA,TOR2A,TRPM8	38
Cardiovascular System Development and Function	development	Development of vasculature	4.58e-09	1.09e-06		0.808	0.348	ADAMTS1,ALOX15,ANXA1,ANXA2,APOE,C3,C6,CCNE1,CELA1,CNN1,COL1A1,COL1A2,COL4A1,CXCL10,DMP1,E2F7,EDIL3,EMILIN1,ESM1,F2,FABP4,FMOD,HAS2,HK2,HLA-DQB1,HSP90AA1,HSPA5,HSPD1,IFNG,IL18BP,IL27,ISM1,LIF,LRG1,MAML3,MMP7,MST1R,NPY,NTN1,NTRK3,OSM,PKHD1,PRDM6,PTGS2,PTX3,REM1,RORA,SCG2,SDC1,SEMA3C,SERPINF1,SERPINH1,SFRP2,SLC4A11,SMAD7,SNAP25,SOCS3,STRA6,TBX20,TF,TGFA,THBS2,TNFSF10,TUBB3,VTN,XBP1	66
Molecular Transport	quantity	Quantity of metal ion	4.69e-09	1.1e-06		0.008	-0.552	ADAMTS1,ANXA2,APOE,ATP2A1,C1QBP,C3,CCKAR,CCL17,CCL19,CCL22,CCL8,CCR10,CCR4,CXCL10,CXCL11,ENTPD2,F2,FABP4,FGF23,HSP90AA1,HSPA5,IFNG,MCHR1,NMUR1,NMUR2,NPHS1,NPY,OSM,P2RY1,PTGS2,SLC4A11,TFEC,TGFA,TOR2A,TRPM8	35
Cellular Movement,Hematological System Development and Function,Immune Cell Trafficking,Inflammatory Response	migration	Migration of phagocytes	4.9e-09	1.12e-06		-0.853	-1.364	ALOX15,ANXA1,ANXA2,APOE,BCL6,C3,CCL17,CCL19,CCL22,CCL8,COL1A1,COL4A1,CXCL10,CXCL11,F2,IFNG,MMP7,NPY,NTN1,PTGS2,SCG2,SDC1,SERPINF1,TREM2,TXN,VCAN,VTN	27
Cellular Movement	cellular infiltration	Cellular infiltration	5.14e-09	1.16e-06		-0.332	-0.491	ANXA1,ANXA2,APOE,C1QTNF6,C3,C6,CCL19,CCL22,CCR4,CXCL10,EDIL3,F2,FABP4,FST,HSPA5,HSPD1,IFNG,IL18BP,LBP,LIF,MOG,NR3C2,NTN1,OLFM4,OSM,P4HB,PDK4,PGLYRP1,PTGS2,PTX3,SMAD7,SOCS3,TBX21,THBS2,TNFRSF8,TNFSF10,XCL1	37
Cancer,Organismal Injury and Abnormalities	breast or pancreatic cancer	Breast or pancreatic cancer	6.23e-09	1.36e-06		1.054	0.99	ABCB1,ADAMTS1,ADAMTS4,ADAMTS5,AICDA,ALOX15,ALPL,ANK1,ANXA1,APOD,APOE,ART5,ATP2A1,BAK1,BCL6,BPIFB3,C1QBP,C3,CA8,CCL17,CCL19,CCL22,CCNB1,CCNE1,CCR10,CCR4,CCT5,CCT6A,CDC20,CDC25A,CDC6,CDH10,CELA1,CKAP4,CLDN1,CLDN3,CLEC10A,CMPK2,CNN1,CNTN1,COL1A1,COL1A2,COL4A1,COL4A6,CPNE7,CTHRC1,CTXN3,CUX2,CXCL10,CXCL11,CYP1A1,DCTPP1,DLGAP1,DLGAP3,DMP1,DNER,DSCAML1,DTL,DUSP5,E2F7,EDIL3,EFCAB12,EIF2AK2,ELL2,ELOVL6,EM…	189
Antimicrobial Response,Inflammatory Response	antimicrobial response	Antimicrobial response	6.3e-09	1.36e-06		1.83	1.483	ADAMTS4,ADAMTS5,AICDA,BAK1,CCL19,CCL22,CCL8,CGAS,CLEC4E,CLEC6A,CXCL10,EIF2AK2,IFIT1,IFIT3,IFIT5,IFNG,IL27,JCHAIN,MMP7,MST1R,MX2,OAS1,OAS2,OSM,PGLYRP1,RTP4,SLAMF8,SOCS3,XCL1	29
Cardiovascular System Development and Function,Organismal Development	angiogenesis	Angiogenesis	7.01e-09	1.49e-06		0.808	0.349	ADAMTS1,ALOX15,ANXA1,ANXA2,APOE,C3,C6,CCNE1,CELA1,COL1A1,COL1A2,COL4A1,CXCL10,DMP1,E2F7,EDIL3,EMILIN1,ESM1,F2,FABP4,HAS2,HK2,HLA-DQB1,HSP90AA1,HSPA5,HSPD1,IFNG,IL18BP,IL27,ISM1,LIF,LRG1,MAML3,MMP7,MST1R,NPY,NTN1,OSM,PRDM6,PTGS2,PTX3,REM1,RORA,SCG2,SEMA3C,SERPINF1,SERPINH1,SFRP2,SLC4A11,SMAD7,SOCS3,STRA6,TBX20,TF,TGFA,THBS2,TNFSF10,TUBB3,VTN,XBP1	60
Cellular Movement,Hematological System Development and Function,Immune Cell Trafficking,Inflammatory Response	cell movement	Cell movement of macrophages	8.48e-09	1.76e-06		-0.683	-1.022	ALOX15,ANXA1,APOE,BCL6,C1QTNF6,C3,C6,CCL19,CCL22,CXCL10,F2,HSPA5,IFNG,MMP7,MOG,NR3C2,NTN1,PDK4,PTGS2,PTX3,SDC1,SLAMF8,SMAD7,THBS2,TREM2,VCAN,VTN	27
Dermatological Diseases and Conditions,Inflammatory Disease,Inflammatory Response,Organismal Injury and Abnormalities	dermatitis	Dermatitis	8.66e-09	1.76e-06		0.238	0.38	ALOX15,ANXA1,APOE,C3,CCL17,CCL22,CCNA2,CCR4,CDC25A,CGAS,CPNE7,CTSL,DSC1,EIF2AK2,FABP4,FKBP4,GZMB,HLA-DQB1,IFNG,IL27,KEL,OSM,PDK4,PGLYRP1,PTGS2,S100A11,SMAD7,SOCS3,TBX21,TGFA,THBS2,TNFRSF8,TNFSF10,TUBB3	34
Cancer,Organismal Injury and Abnormalities,Reproductive System Disease	uterine serous papillary cancer	Uterine serous papillary cancer	8.77e-09	1.76e-06				ABCB1,ANXA2,APOD,CCNA2,CCNB1,CCNE1,CDC20,CDC6,CLDN3,CNN1,COL4A6,EMILIN1,FRZB,GZMA,LAMB3,MFAP4,MOXD1,SLC7A5,TGFA,TK1,TRIP13,UBE2S	22
Cancer,Dermatological Diseases and Conditions,Organismal Injury and Abnormalities	skin cancer	Skin cancer	8.99e-09	1.76e-06				ABCB1,ACHE,ADAMTS4,ADAMTS5,ADAMTSL2,AGBL3,AGMAT,AICDA,AK2,ALOX15,ALPK3,ALPL,ANK1,ANKRD22,ANXA1,ANXA2,APOD,AQP3,ASGR2,ASPHD2,ATP2A1,B3GNT7,BAK1,BATF2,BCL6,BPIFB3,BRI3BP,BTNL9,BYSL,C3,C6,CA8,CCKAR,CCL8,CCR10,CCR4,CCT6A,CDC25A,CDC25C,CDH10,CDT1,CELA1,CENPK,CENPP,CHST1,CISD1,CKAP4,CLDN1,CLDN3,CLEC10A,CLEC4E,CLEC4F,CLEC6A,CMPK2,CNN1,CNTN1,COL1A1,COL1A2,COL4A1,COL4A6,CPAMD8,CPNE7,CTSL,CUX2,CXCL10,CXCL1…	240
Cancer,Organismal Injury and Abnormalities	neck neoplasm	Neck neoplasm	9.02e-09	1.76e-06				ABCB1,ACHE,ADAMTS1,ADAMTS4,ADAMTS5,ADAMTSL2,AGMAT,AICDA,AK2,ALDH18A1,ALOX15,ALPK3,ANK1,ANKRD22,ANXA1,ANXA2,APOD,APOE,ART5,ASGR2,ATP2A1,B3GNT7,BAG2,BAK1,BCL6,BCL7A,BHLHA15,BPIFB3,BRI3BP,BTNL9,BYSL,C16orf45,C1QBP,C1QTNF6,C3,C4orf19,C6,CA8,CCL17,CCNE1,CCR10,CCT5,CCT6A,CDC20,CDC6,CDH10,CDT1,CELA1,CENPK,CENPP,CENPW,CHST1,CISD1,CKAP4,CKS2,CLDN11,CLDN3,CLEC10A,CLEC4A,CMPK2,CNN1,CNTN1,COL1A1,COL1A2,COL4A…	303
Cell Death and Survival	cell death	Cell death of central nervous system cells	9.44e-09	1.81e-06		-0.724	-0.707	ACHE,ALOX15,APOE,BAK1,CCNB1,CDC25A,CDC25C,F2,FAIM2,GZMB,HK2,HSP90AA1,HSPA5,HSPD1,IFNG,MMP7,NTRK3,OSM,P4HB,PTGS2,SERPINF1,SLC1A2,STIP1,TCP1,TF,TGFA,TNFSF10	27
Cell-To-Cell Signaling and Interaction,Hematological System Development and Function,Immune Cell Trafficking,Inflammatory Response	activation	Activation of antigen presenting cells	1.06e-08	1.99e-06		0.823	0.479	ACHE,ANXA2,APOE,C3,C6,CCL22,CLEC4E,CTSL,CXCL10,F2,HLA-DQB1,HSPD1,IFNG,IRF4,LBP,MFSD2A,MOG,MST1R,NPY,OSM,PDK4,PTGS2,RORA,SERPINF1,TBX21,TNFSF10,TREM2,VTN	28
Cancer,Endocrine System Disorders,Organismal Injury and Abnormalities	thyroid gland tumor	Thyroid gland tumor	1.33e-08	2.46e-06				ABCB1,ACHE,ADAMTS1,ADAMTS4,ADAMTS5,ADAMTSL2,AGMAT,AICDA,AK2,ALDH18A1,ALOX15,ALPK3,ANK1,ANKRD22,ANXA2,APOD,APOE,ART5,ASGR2,ATP2A1,B3GNT7,BAG2,BAK1,BCL6,BCL7A,BHLHA15,BPIFB3,BRI3BP,BTNL9,BYSL,C16orf45,C1QBP,C1QTNF6,C3,C4orf19,C6,CA8,CCL17,CCNE1,CCR10,CCT5,CCT6A,CDC20,CDC6,CDH10,CDT1,CELA1,CENPK,CENPP,CENPW,CHST1,CISD1,CKAP4,CKS2,CLDN11,CLDN3,CLEC10A,CLEC4A,CMPK2,CNN1,CNTN1,COL1A1,COL1A2,COL4A1,COL4…	300
Inflammatory Response	inflammation	Inflammation of body cavity	1.42e-08	2.59e-06		0.485	0.884	ABCB1,ALOX15,ANXA1,APOE,BAK1,BCL6,C3,CCL17,CCL22,CCL8,CCR10,CCR4,CGAS,COL1A1,COL1A2,COL4A1,CTSL,CXCL10,CXCL11,CYP1A1,DUSP5,F2,FNDC4,GABRD,GZMA,GZMB,HERC5,HLA-DQB1,HSPA5,IFNG,IL12RB2,LBP,LIF,MMP7,NR3C2,OLFM4,OSM,P4HB,PHB,PTGS2,RET,RORA,RTKN2,SDC1,SHMT2,SMAD7,SOCS3,STRA6,TBX21,TF,TGFA,THBS2,TK1,TKTL1,TNFSF10,TRAM2,TREM2,TRPM8,TXN,UBA7,VNN1,XBP1,XCL1	63
Cell-To-Cell Signaling and Interaction,Hematological System Development and Function	activation	Activation of myeloid cells	1.46e-08	2.62e-06		0.851	0.462	ACHE,ANXA1,ANXA2,APOE,C3,C6,CCL17,CCL22,CCL8,CLEC4E,CXCL10,F2,GZMA,HSPD1,IFNG,IL27,LBP,MFSD2A,MOG,MST1R,NPY,PDK4,PTGS2,RET,RORA,SERPINF1,TNFSF10,TREM2,VTN	29
Cancer,Organismal Injury and Abnormalities,Reproductive System Disease	female genital tract serous carcinoma	Female genital tract serous carcinoma	1.49e-08	2.64e-06				ABCB1,ANXA2,APOD,APOE,CCNA2,CCNB1,CCNE1,CDC20,CDC6,CLDN3,CNN1,COL4A6,EMILIN1,FRZB,GZMA,HSP90AA1,LAMB3,MFAP4,MOXD1,MTFR2,PDK4,POLQ,PTGS2,SEMA3C,SLC7A5,TGFA,THBS2,TK1,TRIP13,TUBB3,UBE2S,VCAN	32
Cancer,Endocrine System Disorders,Organismal Injury and Abnormalities	endocrine gland tumor	Endocrine gland tumor	1.72e-08	3.01e-06		0.218	0.348	ABCB1,ACHE,ADAMTS1,ADAMTS4,ADAMTS5,ADAMTSL2,AGMAT,AICDA,AK2,ALDH18A1,ALOX15,ALPK3,ANK1,ANKRD22,ANXA2,APOD,APOE,ART5,ASGR2,ATP2A1,B3GNT7,BAG2,BAK1,BCL6,BCL7A,BHLHA15,BPIFB3,BRI3BP,BTNL9,BYSL,C16orf45,C1QBP,C1QTNF6,C3,C4orf19,C6,CA8,CCL17,CCNE1,CCR10,CCT5,CCT6A,CDC20,CDC6,CDH10,CDT1,CELA1,CENPK,CENPP,CENPW,CHST1,CISD1,CKAP4,CKS2,CLDN11,CLDN3,CLEC10A,CLEC4A,CMPK2,CNN1,CNTN1,COL1A1,COL1A2,COL4A1,COL4…	303
Cancer,Organismal Injury and Abnormalities	adenoma formation	Adenoma	1.81e-08	3.11e-06		-0.057	0.146	ABCB1,ACHE,ALOX15,ANXA2,BAK1,BYSL,C3,CCKAR,CCNB1,CCNE1,CEMIP,FABP4,IFNG,ISLR,JCHAIN,LAMB3,MMP7,NR3C2,NTMT1,PDK4,PPA1,PTGS2,RET,RNASE1,S100A11,SKA3,SLC7A5,SORD,STX1A,TGFA,TRAM2,UBE2S,VTN	33
Cancer,Organismal Injury and Abnormalities	melanoma	Melanoma	1.95e-08	3.28e-06		-1.67	-1.761	ABCB1,ACHE,ADAMTS1,ADAMTS4,ADAMTS5,ADAMTSL2,AGBL3,AGMAT,AICDA,AK2,ALDH18A1,ALOX15,ALPK3,ALPL,ANK1,ANKRD22,ANXA1,ANXA2,APOD,AQP3,ASGR2,ASPHD2,ATP2A1,B3GNT7,BATF2,BCL6,BPIFB3,BRI3BP,BTNL9,BYSL,C1QBP,C3,C6,CA8,CCKAR,CCL22,CCL8,CCR10,CCR4,CCT6A,CDC25A,CDC25C,CDH10,CDT1,CELA1,CENPK,CENPP,CHST1,CISD1,CKAP4,CLDN1,CLEC10A,CLEC4E,CLEC4F,CLEC6A,CMPK2,CNN1,CNTN1,COL1A1,COL1A2,COL4A1,COL4A6,CPAMD8,CPNE7,CTSL…	260
Dermatological Diseases and Conditions,Organismal Injury and Abnormalities	skin lesion	Skin lesion	1.96e-08	3.28e-06		0.35	0.472	ABCB1,ACHE,ADAMTS4,ADAMTS5,ADAMTSL2,AGBL3,AGMAT,AICDA,AK2,ALOX15,ALPK3,ALPL,ANK1,ANKRD22,ANXA1,ANXA2,APOD,APOE,AQP3,ASGR2,ASPHD2,ATP2A1,B3GNT7,BAK1,BATF2,BCL6,BPIFB3,BRI3BP,BTNL9,BYSL,C3,C6,CA8,CCKAR,CCL8,CCR10,CCR4,CCT6A,CDC25A,CDC25C,CDH10,CDT1,CELA1,CENPK,CENPP,CHST1,CISD1,CKAP4,CLDN1,CLDN3,CLEC10A,CLEC4E,CLEC4F,CLEC6A,CMPK2,CNN1,CNTN1,COL1A1,COL1A2,COL4A1,COL4A6,CPAMD8,CPNE7,CTSL,CUX2,CXCL10,…	241
Cellular Movement,Hematological System Development and Function,Immune Cell Trafficking	cell movement	Cell movement of antigen presenting cells	2.03e-08	3.34e-06		-1.411	-1.853	ALOX15,ANXA1,APOE,BCL6,C1QTNF6,C3,C6,CCL17,CCL19,CCL22,CXCL10,CXCL11,F2,HSPA5,IFNG,MMP7,MOG,NPY,NR3C2,NTN1,PDK4,PTGS2,PTX3,SCG2,SDC1,SLAMF8,SMAD7,THBS2,TREM2,VCAN,VTN	31
Cancer,Organismal Injury and Abnormalities	incidence	Incidence of tumor	2.45e-08	3.99e-06		-0.635	-0.48	ABCB1,ACHE,ADAMTS1,ADAMTS4,ADAMTS5,AICDA,AK2,ALOX15,ALPK3,ALPL,ANK1,ANKRD22,ANXA1,ANXA2,APOD,APOE,ART5,ASGR2,ATP2A1,BAK1,BATF2,BCL6,BHLHA15,BPIFB3,BYSL,C16orf45,C1QBP,C1QTNF6,C3,C6,CA8,CCKAR,CCNA2,CCNB1,CCNE1,CCR10,CCR4,CCT5,CCT6A,CDC20,CDC25A,CDC25C,CDC6,CDH10,CEMIP,CHST1,CKAP4,CKS2,CLDN11,CLDN3,CLEC4F,CNN1,CNTN1,COL1A1,COL1A2,COL4A1,COL4A6,CPAMD8,CPNE7,CTHRC1,CTSL,CTXN3,CUX2,CXCL10,CXCL11,CYP1A…	271
Cancer,Endocrine System Disorders,Organismal Injury and Abnormalities	epithelial thyroid cancer	Thyroid carcinoma	2.66e-08	4.22e-06				ABCB1,ACHE,ADAMTS1,ADAMTS4,ADAMTS5,ADAMTSL2,AGMAT,AICDA,AK2,ALDH18A1,ALOX15,ALPK3,ANK1,ANKRD22,ANXA2,APOD,APOE,ART5,ASGR2,ATP2A1,B3GNT7,BAG2,BAK1,BCL6,BCL7A,BHLHA15,BPIFB3,BTNL9,BYSL,C16orf45,C1QBP,C1QTNF6,C3,C4orf19,C6,CA8,CCL17,CCNE1,CCR10,CCT5,CCT6A,CDC20,CDC6,CDH10,CDT1,CELA1,CENPK,CENPP,CENPW,CHST1,CISD1,CKAP4,CKS2,CLDN11,CLDN3,CLEC10A,CLEC4A,CMPK2,CNN1,CNTN1,COL1A1,COL1A2,COL4A1,COL4A6,CPAM…	298
Cancer,Endocrine System Disorders,Organismal Injury and Abnormalities	nonpituitary endocrine tumor	Nonpituitary endocrine tumor	2.67e-08	4.22e-06				ABCB1,ACHE,ADAMTS1,ADAMTS4,ADAMTS5,ADAMTSL2,AGMAT,AICDA,AK2,ALDH18A1,ALOX15,ALPK3,ANK1,ANKRD22,ANXA2,APOD,APOE,ART5,ASGR2,ATP2A1,B3GNT7,BAG2,BAK1,BCL6,BCL7A,BHLHA15,BPIFB3,BRI3BP,BTNL9,BYSL,C16orf45,C1QBP,C1QTNF6,C3,C4orf19,C6,CA8,CCL17,CCNE1,CCR10,CCT5,CCT6A,CDC20,CDC6,CDH10,CDT1,CELA1,CENPK,CENPP,CENPW,CHST1,CISD1,CKAP4,CKS2,CLDN11,CLDN3,CLEC10A,CLEC4A,CMPK2,CNN1,CNTN1,COL1A1,COL1A2,COL4A1,COL4…	301
Hematological System Development and Function,Inflammatory Response,Tissue Morphology	quantity	Quantity of phagocytes	2.71e-08	4.22e-06		0.007	-0.081	ABCB1,ANXA1,APOE,BCL6,C3,C6,CCL19,CCL22,CCR4,CLEC10A,CLEC4A,CLEC4E,CXCL10,CYP1A1,IFNG,IL12RB2,IL18BP,IRF4,LIF,MOG,NPY,NR3C2,PGLYRP1,RORA,SDC1,SOCS3,TBX21,TF,TGFA,TNFSF10,TREM2,VTN,XBP1,XCL1	34
Cell-To-Cell Signaling and Interaction,Hematological System Development and Function,Immune Cell Trafficking,Inflammatory Response	activation	Activation of phagocytes	2.75e-08	4.23e-06		1.192	0.823	ACHE,ANXA1,ANXA2,APOE,C3,C6,CCL17,CCL22,CCL8,CLEC4E,CXCL10,F2,GZMA,HSPD1,IFNG,IL27,LBP,MFSD2A,MOG,MST1R,NPY,OSM,PDK4,PTGS2,RORA,SERPINF1,TBX21,TNFSF10,TREM2,VTN	30
Cellular Movement,Hematological System Development and Function,Immune Cell Trafficking	cellular infiltration	Cellular infiltration by leukocytes	2.84e-08	4.31e-06		-0.251	-0.413	ANXA1,ANXA2,APOE,C1QTNF6,C3,C6,CCL19,CCL22,CCR4,CXCL10,EDIL3,F2,FABP4,HSPA5,HSPD1,IFNG,IL18BP,LBP,MOG,NR3C2,NTN1,OLFM4,OSM,PDK4,PGLYRP1,PTGS2,PTX3,SMAD7,SOCS3,TBX21,TNFRSF8,TNFSF10,XCL1	33
Cell Death and Survival,Neurological Disease,Organismal Injury and Abnormalities	cell death	Cell death of brain cells	3.07e-08	4.61e-06		-0.785	-0.777	ACHE,ALOX15,APOE,BAK1,CCNB1,CDC25A,CDC25C,F2,FAIM2,GZMB,HK2,HSPA5,HSPD1,MMP7,NTRK3,OSM,P4HB,PTGS2,SERPINF1,SLC1A2,STIP1,TCP1,TF,TGFA,TNFSF10	25
Hematological System Development and Function,Tissue Morphology	quantity	Quantity of granulocytes	3.43e-08	5.08e-06		-0.326	-0.283	ABCB1,ACHE,ALOX15,ANXA1,BCL6,C3,C6,CCL22,CCR4,CLEC10A,CLEC4A,CLEC4E,CYP1A1,DUSP5,IFNG,IL18BP,LIF,MOG,PGLYRP1,PTGS2,RORA,SDC1,SOCS3,TF,TGFA,TNFSF10,TXN,VTN	28
Cellular Movement	migration	Migration of cells	3.64e-08	5.32e-06		1.824	1.157	ADAMTS1,ALOX15,ANXA1,ANXA2,APOE,AQP3,BCL6,C1QBP,C1QTNF6,C3,C6,CCKAR,CCL17,CCL19,CCL22,CCL8,CCNA2,CCR10,CCR4,CEMIP,CHST1,CLDN11,CLEC10A,CLEC4E,CNTN1,COL1A1,COL1A2,COL4A1,CTSL,CXCL10,CXCL11,CYP1A1,DMP1,DTL,DUSP5,EDIL3,EIF2AK2,F2,FABP4,FAIM2,FKBP4,FMOD,GFRA3,GZMB,HAS2,HSP90AA1,HSPA5,HSPD1,IFNG,IL18BP,JCHAIN,KIRREL3,LAMB3,LBP,LGR6,LIF,MCM2,MMP7,MOG,MOV10L1,MST1R,NAMPT,NPY,NR3C2,NTN1,NTRK3,OLFM4,OSM,P…	103
Cancer,Organismal Injury and Abnormalities	genitourinary tumor	Genitourinary tumor	3.68e-08	5.32e-06		0.633	0.594	ABCB1,ACHE,ADAMTS1,ADAMTS4,ADAMTS5,AGBL3,AICDA,AK2,ALDH18A1,ALOX15,ALPK3,ALPL,ANK1,ANXA1,ANXA2,APOD,APOE,ART5,ASGR2,ATP2A1,BAK1,BCL6,BHLHA15,BTNL9,C16orf45,C1QBP,C3,C6,CA8,CCKAR,CCL17,CCL19,CCNA2,CCNB1,CCNE1,CCR4,CCT5,CCT6A,CDC20,CDC25A,CDC25C,CDC6,CDH10,CDT1,CENPP,CISD1,CKAP4,CLDN1,CLDN11,CLDN3,CLEC10A,CLEC4A,CLEC4F,CMPK2,CNN1,CNTN1,COL1A1,COL1A2,COL4A1,COL4A6,CPAMD8,CPNE7,CTSL,CTXN3,CUX2,CXCL10…	268
Immunological Disease	hypersensitive reaction	Hypersensitive reaction	4.07e-08	5.8e-06		-1.461	-1.705	ANXA1,APOE,C3,CCL17,CCL22,CCNA2,CCR4,CDC25A,CLEC4E,CPNE7,CTSL,CXCL10,EIF2AK2,FABP4,FKBP4,GZMB,HLA-DQB1,IFNG,IL27,KEL,LBP,LIF,MOG,MST1R,OSM,PDK4,PTGES2,PTGS2,S100A11,SDC1,SOCS3,TNFRSF8,TNFSF10	33
Cell-To-Cell Signaling and Interaction	activation	Activation of cells	4.35e-08	6.13e-06		1.898	1.408	ACHE,AICDA,ANXA1,ANXA2,APOE,BAK1,C3,C6,CCL17,CCL22,CCL8,CGAS,CLEC4E,COL1A1,COL1A2,CTSL,CXCL10,DDOST,EIF2AK2,ENTPD2,F2,FMOD,FRZB,GABRD,GP2,GZMA,GZMB,HLA-DQB1,HSPD1,HSPH1,IFNG,IL12RB2,IL27,IRF4,LBP,LIF,MFSD2A,MOG,MST1R,NPY,OSM,P2RY1,PDK4,PTGS2,RET,RORA,SERPINF1,SLC6A15,TBX21,TF,TGFA,TNFRSF8,TNFSF10,TREM2,VCAN,VIPR1,VNN1,VTN,ZBP1	59
Cancer,Dermatological Diseases and Conditions,Organismal Injury and Abnormalities	cutaneous melanoma	Cutaneous melanoma	6.71e-08	9.35e-06				ABCB1,ACHE,ADAMTS4,ADAMTS5,ADAMTSL2,AGBL3,AGMAT,AICDA,AK2,ALOX15,ALPK3,ALPL,ANK1,ANKRD22,ANXA2,APOD,AQP3,ASGR2,ASPHD2,ATP2A1,B3GNT7,BATF2,BCL6,BPIFB3,BRI3BP,BTNL9,BYSL,C3,C6,CA8,CCKAR,CCL8,CCR10,CCR4,CCT6A,CDC25A,CDC25C,CDH10,CDT1,CELA1,CENPK,CENPP,CHST1,CISD1,CKAP4,CLDN1,CLEC10A,CLEC4E,CLEC4F,CLEC6A,CMPK2,CNN1,CNTN1,COL1A1,COL1A2,COL4A1,COL4A6,CPAMD8,CPNE7,CUX2,CXCL11,CYP1A1,DDN,DDO,DDOST,DLGAP1…	227
Hematological System Development and Function,Tissue Morphology	quantity	Quantity of myeloid cells	7.07e-08	9.73e-06		-0.607	-0.62	ABCB1,ACHE,ALOX15,ANXA1,APOE,BCL6,C3,C6,CCL22,CCR4,CLEC10A,CLEC4A,CLEC4E,CXCL10,CYP1A1,DUSP5,IFNG,IL12RB2,IL18BP,LIF,MOG,NPY,NR3C2,PGLYRP1,PTGS2,RORA,SDC1,SOCS3,TBX21,TF,TGFA,THBS2,TNFSF10,TREM2,TXN,VTN	36
Hematological System Development and Function,Tissue Development	accumulation	Accumulation of myeloid cells	7.72e-08	1.05e-05		0.19	0.007	ANXA1,APOE,C3,C6,CCL17,CXCL10,DSC1,EDIL3,IFNG,IRF4,MMP7,MOG,OSM,PTGS2,PTX3,RET,SMAD7,TNFSF10,XBP1	19
Hematological System Development and Function,Tissue Development	accumulation	Accumulation of blood cells	8.25e-08	1.11e-05		0.122	-0.077	AICDA,ANXA1,APOE,C3,C6,CCL17,CCL22,CLEC4A,CXCL10,DSC1,EDIL3,F2,IFNG,IRF4,MMP7,MOG,OSM,P4HB,PTGS2,PTX3,RET,SMAD7,TNFRSF8,TNFSF10,XBP1	25
Cancer,Organismal Injury and Abnormalities,Reproductive System Disease	mammary tumor	Mammary tumor	1.03e-07	1.36e-05		0.599	0.502	ABCB1,ADAMTS1,ADAMTS4,ADAMTS5,AICDA,ALOX15,ALPL,ANXA1,APOD,APOE,ART5,ATP2A1,BAK1,BCL6,C1QBP,C3,CCL17,CCL19,CCNA2,CCNB1,CCNE1,CCR4,CDC20,CDC25A,CDC6,CDH10,CDT1,CISD1,CKAP4,CLDN1,CLDN3,CLEC10A,CMPK2,CNN1,CNTN1,COL1A1,COL1A2,CTXN3,CXCL10,CYP1A1,DCTPP1,DTL,E2F7,EIF2AK2,ELOVL6,EMILIN1,ENTPD2,ERCC6L,FABP4,FNDC4,FRZB,GABRD,GFPT2,GRID1,HAPLN3,HERC5,HIGD1A,HK2,HSP90AA1,HSPA5,HSPD1,IFIT1,IFNG,LAMB3,LBP,LIF…	110
Cancer,Organismal Injury and Abnormalities	malignant genitourinary solid tumor	Malignant genitourinary solid tumor	1.09e-07	1.44e-05		0.64	0.6	ABCB1,ACHE,ADAMTS1,ADAMTS4,ADAMTS5,AGBL3,AICDA,AK2,ALDH18A1,ALOX15,ALPK3,ALPL,ANK1,ANXA1,ANXA2,APOD,APOE,ART5,ASGR2,ATP2A1,BAK1,BCL6,BHLHA15,BTNL9,C16orf45,C1QBP,C3,C6,CA8,CCKAR,CCL17,CCL19,CCNA2,CCNB1,CCNE1,CCR4,CCT5,CCT6A,CDC20,CDC25A,CDC25C,CDC6,CDH10,CDT1,CENPP,CKAP4,CLDN1,CLDN11,CLDN3,CLEC10A,CLEC4A,CLEC4F,CMPK2,CNN1,CNTN1,COL1A1,COL1A2,COL4A1,COL4A6,CPAMD8,CPNE7,CTSL,CTXN3,CUX2,CXCL10,CXCL1…	262
Cell Morphology	polarization	Polarization of blood cells	1.15e-07	1.5e-05	Increased	2.099	1.648	APOE,CCL17,CCL19,CCL22,CXCL10,IFNG,IL12RB2,IL27,IRF4,NAMPT,NPY,SOCS3,TBX21,TXN,ZBP1	15
Cell-To-Cell Signaling and Interaction,Hematological System Development and Function,Immune Cell Trafficking,Inflammatory Response	activation	Activation of macrophages	1.18e-07	1.52e-05		0.507	0.178	ACHE,ANXA2,APOE,C3,C6,CCL22,CLEC4E,CXCL10,F2,HSPD1,IFNG,LBP,MFSD2A,MOG,MST1R,NPY,PDK4,PTGS2,RORA,SERPINF1,TREM2,VTN	22
Cardiovascular System Development and Function	neovascularization	Neovascularization	1.2e-07	1.53e-05		-0.047	-0.295	ALOX15,ANXA2,APOE,C3,C6,IFNG,LIF,MMP7,NPY,NTN1,PTGS2,RORA,SCG2,SERPINF1,SOCS3,TGFA,THBS2,TNFSF10	18
Cancer,Organismal Injury and Abnormalities	anogenital cancer	Anogenital cancer	1.31e-07	1.64e-05		0.64	0.583	ABCB1,ACHE,ADAMTS1,ADAMTS4,ADAMTS5,AGBL3,AICDA,ALDH18A1,ALOX15,ALPK3,ALPL,ANK1,ANXA1,ANXA2,APOD,APOE,ART5,ASGR2,ATP2A1,BAK1,BCL6,BHLHA15,BTNL9,C16orf45,C1QBP,C3,C6,CA8,CCKAR,CCL17,CCL19,CCNA2,CCNB1,CCNE1,CCR4,CCT5,CCT6A,CDC20,CDC25A,CDC25C,CDC6,CDH10,CENPP,CKAP4,CLDN1,CLDN11,CLDN3,CLEC10A,CLEC4A,CLEC4F,CMPK2,CNN1,CNTN1,COL1A1,COL1A2,COL4A1,COL4A6,CPAMD8,CPNE7,CTSL,CTXN3,CUX2,CXCL10,CXCL11,CYP1A1,…	247
Cell-To-Cell Signaling and Interaction,Hematological System Development and Function	activation	Activation of blood cells	1.37e-07	1.7e-05		1.475	1.052	ACHE,AICDA,ANXA1,ANXA2,APOE,BAK1,C3,C6,CCL17,CCL22,CCL8,CGAS,CLEC4E,COL1A1,COL1A2,CTSL,CXCL10,DDOST,ENTPD2,F2,GP2,GZMA,HLA-DQB1,HSPD1,HSPH1,IFNG,IL12RB2,IL27,IRF4,LBP,MFSD2A,MOG,MST1R,NPY,OSM,P2RY1,PDK4,PTGS2,RET,RORA,SERPINF1,TBX21,TNFSF10,TREM2,VCAN,VIPR1,VTN	47
Cancer,Organismal Injury and Abnormalities	frequency	Frequency of tumor	1.4e-07	1.73e-05		-0.619	-0.439	ABCB1,ACHE,ADAMTS1,ADAMTS4,ADAMTS5,AICDA,ALOX15,ALPK3,ALPL,ANK1,ANKRD22,ANXA1,ANXA2,APOD,APOE,ART5,ASGR2,ATP2A1,BAK1,BATF2,BCL6,BHLHA15,BPIFB3,BYSL,C1QBP,C1QTNF6,C3,C6,CA8,CCKAR,CCNA2,CCNB1,CCNE1,CCR10,CCR4,CCT5,CCT6A,CDC20,CDC25A,CDC25C,CDC6,CDH10,CEMIP,CHST1,CKAP4,CKS2,CLDN3,CNN1,CNTN1,COL1A1,COL1A2,COL4A1,COL4A6,CPAMD8,CPNE7,CTHRC1,CTSL,CTXN3,CUX2,CXCL11,CYP1A1,DDO,DEPDC1B,DLGAP1,DLGAP3,DNER,D…	261
Cardiovascular System Development and Function,Organismal Development	vasculogenesis	Vasculogenesis	1.44e-07	1.75e-05		0.771	0.335	ADAMTS1,ALOX15,ANXA1,ANXA2,APOE,C3,C6,CCNE1,COL1A1,COL1A2,COL4A1,CXCL10,DMP1,EDIL3,F2,FABP4,HAS2,HLA-DQB1,HSPA5,IFNG,IL18BP,LIF,LRG1,MMP7,MST1R,NPY,NTN1,OSM,PTGS2,PTX3,REM1,RORA,SCG2,SEMA3C,SERPINF1,SERPINH1,SFRP2,SLC4A11,SMAD7,SOCS3,STRA6,TBX20,TF,TGFA,THBS2,TNFSF10,TUBB3,VTN,XBP1	49
Cellular Movement	chemotaxis	Chemotaxis	1.49e-07	1.79e-05		1.887	1.151	ANXA1,ANXA2,APOE,C1QBP,C3,CCL17,CCL19,CCL22,CCL8,CCR10,CCR4,CXCL10,CXCL11,F2,HSPD1,IFNG,LBP,LIF,MMP7,MYO5B,NPY,NTN1,NTRK3,OSM,PTGS2,SCG2,SERPINF1,SERPINH1,SLAMF8,SOCS3,TGFA,THBS2,TNFRSF8,TREM2,TXN,VIPR1,VTN,XCL1	38
Immunological Disease	allergy	Allergy	1.92e-07	2.29e-05		-0.351	-0.479	ANXA1,AQP3,C3,CCL17,CCL22,CCNA2,CCR4,CDC25A,CPNE7,CTSL,FABP4,FKBP4,GZMA,GZMB,HLA-DQB1,HSPA5,IFNG,IL18BP,KEL,LBP,OSM,P4HB,PDK4,PTGES2,PTGS2,S100A11,SMAD7,SOCS3,TBX21,TNFRSF8,TNFSF10	31
Cell Death and Survival	apoptosis	Apoptosis	1.95e-07	2.31e-05		-0.525	-0.22	ABCB1,ACHE,ADAMTS1,ALOX15,ANXA1,ANXA2,APOE,AQP3,ATP2A1,BAK1,BCL6,C1QBP,C3,C6,CCDC86,CCL19,CCNA2,CCNB1,CCNE1,CDC20,CDC25A,CDC25C,CDC6,CKS2,COL1A1,COL4A1,CTSL,CXCL10,DDN,DMP1,DRAM1,DUSP5,E2F7,EDIL3,EIF2AK2,EIF5A,ERCC6L,F2,FAIM2,FAM72A,FKBP4,FMOD,FRZB,FST,GFRA3,GP2,GZMA,GZMB,HAS2,HEBP2,HIGD1A,HK2,HLA-DQB1,HSP90AA1,HSPA5,HSPD1,HSPH1,IFIT3,IFNG,IL27,IRF4,ISM1,LARP1B,LIF,MANF,MCM10,MCM2,MMP7,MOG,MOV10L…	121
Cancer,Organismal Injury and Abnormalities	development	Development of benign tumor	2.05e-07	2.4e-05		-0.852	-0.647	ABCB1,ACHE,ALOX15,ANXA2,BAK1,BYSL,C3,CCKAR,CCNB1,CCNE1,CEMIP,DUSP5,FABP4,IFNG,ISLR,JCHAIN,LAMB3,MMP7,NR3C2,NTMT1,PDK4,PPA1,PTGS2,RET,RNASE1,S100A11,SKA3,SLC7A5,SORD,STX1A,TGFA,THBS2,TRAM2,UBE2S,VTN	35
Cancer,Organismal Injury and Abnormalities	tumorigenesis	Tumorigenesis of epithelial neoplasm	2.11e-07	2.44e-05		-0.876	-0.721	ABCB1,ACHE,ADAMTS1,ADAMTS4,AICDA,ALOX15,ALPK3,ALPL,ANK1,ANKRD22,ANXA1,ANXA2,APOD,APOE,ART5,ASGR2,ATP2A1,BAK1,BATF2,BCL6,BHLHA15,BPIFB3,BYSL,C1QBP,C1QTNF6,C3,C6,CA8,CCKAR,CCNA2,CCNB1,CCNE1,CCR10,CCR4,CCT5,CCT6A,CDC20,CDC25A,CDC25C,CDC6,CDH10,CEMIP,CHST1,CKAP4,CKS2,CLDN3,CNTN1,COL1A1,COL1A2,COL4A1,COL4A6,CPAMD8,CPNE7,CTSL,CTXN3,CUX2,CXCL11,CYP1A1,DDO,DEPDC1B,DLGAP1,DLGAP3,DNER,DPEP2,DRAM1,DSCAML1,D…	257
Tissue Development	accumulation	Accumulation of cells	2.15e-07	2.46e-05		0.498	0.339	AICDA,ANXA1,APOE,C3,C6,CCL17,CCL22,CLEC4A,CXCL10,DSC1,EDIL3,F2,HAS2,IFNG,IRF4,MMP7,MOG,OSM,P4HB,PTGS2,PTX3,RET,SMAD7,TNFRSF8,TNFSF10,XBP1,ZIC2	27
Connective Tissue Disorders,Inflammatory Disease,Inflammatory Response,Organismal Injury and Abnormalities,Skeletal and Muscular Disorders	osteoarthritis	Osteoarthritis	2.73e-07	3.1e-05				ACHE,ADAMTS1,ADAMTS4,ADAMTS5,ALOX15,ANXA1,C3,CEMIP,FMOD,FRZB,GABRD,MMP7,PTGS2,PTX3,SDC1,SDC3,SLC1A2,SNAP25,TF,TUBB3,XBP1	21
Cancer,Organismal Injury and Abnormalities	serous adenocarcinoma	Serous adenocarcinoma	2.78e-07	3.13e-05				ABCB1,ANXA2,APOD,APOE,C3,CA8,CCNA2,CCNB1,CCNE1,CDC20,CDC6,CKAP4,CLDN3,CNN1,COL4A6,EMILIN1,F2,FRZB,GPR75,GZMA,HAS2,HPDL,HSP90AA1,INSRR,IQSEC3,LAMB3,MAML3,MCM10,MFAP4,MOXD1,MTFR2,NTRK3,PDK4,POLQ,PTGS2,RGS20,RIMBP2,SCG2,SDS,SEMA3C,SLC7A5,STRA6,TGFA,THBS2,TK1,TRAM2,TRIP13,TUBB3,UBA7,UBE2S,VCAN,VNN1	52
Cell-To-Cell Signaling and Interaction,Hematological System Development and Function,Immune Cell Trafficking,Inflammatory Response	activation	Activation of leukocytes	2.95e-07	3.29e-05		1.668	1.246	ACHE,AICDA,ANXA1,ANXA2,APOE,BAK1,C3,C6,CCL17,CCL22,CCL8,CGAS,CLEC4E,CTSL,CXCL10,DDOST,F2,GP2,GZMA,HLA-DQB1,HSPD1,HSPH1,IFNG,IL12RB2,IL27,IRF4,LBP,MFSD2A,MOG,MST1R,NPY,OSM,PDK4,PTGS2,RET,RORA,SERPINF1,TBX21,TNFSF10,TREM2,VCAN,VIPR1,VTN	43
Cell Death and Survival,Neurological Disease,Organismal Injury and Abnormalities	cell death	Cell death of cerebral cortex cells	3.05e-07	3.35e-05		-1.101	-1.118	ACHE,ALOX15,APOE,BAK1,CCNB1,CDC25A,F2,GZMB,HK2,HSPA5,HSPD1,MMP7,NTRK3,OSM,P4HB,PTGS2,SLC1A2,STIP1,TCP1,TF,TGFA	21
Cell Death and Survival	cell viability	Cell viability	3.06e-07	3.35e-05	Increased	2.716	1.826	ABCB1,ACHE,ADAMTS1,AICDA,APOD,APOE,AQP3,BAK1,BCL6,C3,CCNA2,CCNB1,CLDN3,COL1A1,CXCL10,CXCL11,DUSP5,F2,FAIM2,GFRA2,GFRA3,HK2,HSPA5,HSPA6,HSPD1,IFNG,IL27,INSRR,IRF4,LAMB3,LIF,LRFN1,MCM2,MMS22L,MOG,MST1R,NAMPT,NPHS1,NPY,NTN1,NTRK3,NUPR1,OSM,P4HB,PDK4,PHB,PTGS2,RET,SDC1,SERPINF1,SFRP2,SHMT2,SKA1,SKA3,SLC16A1,SLC1A2,SLC1A5,SLC40A1,SNAP25,SOCS3,STX1A,TBX21,TCP1,TF,TGFA,THBS2,TNFRSF8,TNFSF10,TRPM8,TUBB3,…	74
Cell-To-Cell Signaling and Interaction,Inflammatory Response	immune response	Immune response of leukocytes	3.18e-07	3.44e-05		1.893	1.48	ALOX15,ANXA1,APOE,BAK1,C3,CCL19,CCL22,CLEC6A,CXCL10,GZMB,HLA-DQB1,HSP90AA1,IFNG,NAMPT,NTN1,OSM,PGLYRP1,PTX3,RET,RORA,SLC1A5,SOCS3,TBX21,TREM2,VTN,XBP1	26
Cancer,Hematological Disease,Immunological Disease,Organismal Injury and Abnormalities	mature T-cell neoplasm	Mature T-cell neoplasm	3.3e-07	3.54e-05				ANXA1,BAK1,BCL6,C3,CCL17,CCL19,CCL22,CCL8,CCR4,COL1A1,COL1A2,COL4A1,CXCL10,CXCL11,DUSP5,GZMB,HSP90AA1,IFIT3,IRF4,LIF,MST1R,OAS1,OAS2,RET,SDC1,SERPINF1,SERPINH1,SLAMF8,TBX21,TNFRSF8,TUBB3,VTN	32
Cellular Movement,Hematological System Development and Function,Immune Cell Trafficking	migration	Migration of antigen presenting cells	3.34e-07	3.55e-05		-0.319	-0.743	ALOX15,APOE,BCL6,C3,CCL17,CCL19,CCL22,CXCL10,CXCL11,IFNG,NPY,NTN1,PTGS2,SCG2,SDC1,TREM2,VCAN,VTN	18
Hematological System Development and Function,Immune Cell Trafficking,Inflammatory Response,Tissue Development	accumulation	Accumulation of leukocytes	3.45e-07	3.63e-05		0.125	-0.086	AICDA,ANXA1,APOE,C3,C6,CCL17,CCL22,CLEC4A,CXCL10,DSC1,EDIL3,IFNG,IRF4,MMP7,MOG,OSM,PTGS2,PTX3,RET,SMAD7,TNFRSF8,TNFSF10,XBP1	23
Molecular Transport	secretion	Secretion of molecule	3.54e-07	3.7e-05		-0.863	-1.241	ABCB1,ACHE,ANXA1,ANXA2,APOE,CCKAR,CLEC4E,CLEC6A,ELL2,F2,FABP4,FGF23,FST,HAS2,HSPA5,IFNG,LIF,MCHR1,NMUR2,NPY,OSM,P2RY1,P4HB,PHB,PLA2G4F,PTGES2,PTGS2,RET,SCG2,SLC1A2,SNAP25,SOCS3,STX1A,SYN1,SYT7,TGFA,TREM2,UNC13A	38
Cardiovascular System Development and Function	neovascularization	Neovascularization of organ	3.89e-07	4e-05		0.306	0.077	ALOX15,APOE,C3,C6,IFNG,LIF,MMP7,NTN1,PTGS2,RORA,SCG2,SERPINF1,SOCS3,TGFA	14
Cancer,Organismal Injury and Abnormalities	subcutaneous tumor	Subcutaneous tumor	3.9e-07	4e-05				ACHE,ADAMTS1,AK2,CCNE1,CLDN11,COL1A1,COL1A2,COL4A1,COL4A6,FABP4,FMOD,IFIT1,IFIT3,IFNG,MST1R,MYBL1,NR3C2,NUPR1,PDK4,PTGS2,RET,RORA,S100A11,SCG2,SOCS3,TPBG,TUBB3,VCAN	28
Antimicrobial Response,Inflammatory Response	antiviral response	Antiviral response	4.39e-07	4.46e-05		1.829	1.5	CCL19,CCL22,CCL8,CGAS,CXCL10,EIF2AK2,IFIT1,IFIT3,IFIT5,IFNG,IL27,MST1R,MX2,OAS1,OAS2,OSM,RTP4,SOCS3,XCL1	19
Cancer,Organismal Injury and Abnormalities,Reproductive System Disease	breast cancer	Breast cancer	4.49e-07	4.53e-05		1.109	1.041	ABCB1,ADAMTS1,ADAMTS4,ADAMTS5,AICDA,ALOX15,ALPL,ANXA1,APOD,APOE,ART5,ATP2A1,BAK1,BCL6,C1QBP,C3,CCL17,CCL19,CCNB1,CCNE1,CCR4,CDC20,CDC25A,CDC6,CDH10,CKAP4,CLDN1,CLDN3,CLEC10A,CMPK2,CNN1,CNTN1,COL1A1,COL1A2,CTXN3,CXCL10,CYP1A1,DCTPP1,DTL,E2F7,EIF2AK2,ELOVL6,EMILIN1,ENTPD2,ERCC6L,FABP4,FNDC4,FRZB,GABRD,GFPT2,GRID1,HAPLN3,HERC5,HIGD1A,HK2,HSP90AA1,HSPA5,HSPD1,IFIT1,LAMB3,LBP,LIF,LMAN1,MCM10,MCM2,MMP7…	103
Cell-To-Cell Signaling and Interaction,Cellular Movement,Immune Cell Trafficking	attraction	Attraction of phagocytes	4.88e-07	4.88e-05		1.591	1.071	ANXA1,C3,CCL17,CCL19,CCL22,CXCL10,CXCL11,VCAN,XCL1	9
Cardiovascular System Development and Function	vascularization	Vascularization	5.51e-07	5.46e-05		0.086	-0.234	ADAMTS1,ALOX15,ANXA2,APOE,C3,C6,IFNG,IL12RB2,LIF,MMP7,MST1R,NPY,NTN1,PTGS2,RORA,SCG2,SERPINF1,SOCS3,TGFA,THBS2,TNFSF10	21
Cell Morphology	polarization	Polarization of leukocytes	6.01e-07	5.9e-05		1.916	1.486	APOE,CCL17,CCL19,CCL22,IFNG,IL12RB2,IL27,IRF4,NAMPT,NPY,SOCS3,TBX21,TXN,ZBP1	14
Cellular Function and Maintenance	clearance	Clearance by phagocytes	6.09e-07	5.93e-05		0.152	0.079	ANXA2,APOE,C3,PTX3	4
Cellular Growth and Proliferation,Connective Tissue Development and Function,Tissue Development	proliferation	Proliferation of connective tissue cells	6.18e-07	5.97e-05		0.456	0.084	ANXA2,CCNA2,CCNB1,CCNE1,CDC6,CLEC4A,COL1A1,CTHRC1,DMP1,EIF2AK2,ERCC6L,F2,FGF23,FST,HAS2,IFNG,LIF,MMP7,MST1R,NPY,NTRK3,NUPR1,OSM,PTGS2,RET,S100A11,SERPINF1,SERPINH1,SMAD7,SOCS3,STIP1,TF,TGFA,TNFSF10,TREM2,TXN,VCAN,VTN,XBP1	39
Cell Death and Survival	survival	Cell survival	6.5e-07	6.23e-05	Increased	2.417	1.513	ABCB1,ACHE,ADAMTS1,AICDA,APOD,APOE,AQP3,BAK1,BCL6,C3,CCNA2,CCNB1,CLDN3,COL1A1,CXCL10,CXCL11,DUSP5,F2,FAIM2,GFRA2,GFRA3,GZMB,HK2,HSPA5,HSPA6,HSPD1,IFNG,IL27,INSRR,IRF4,LAMB3,LIF,LRFN1,MCM2,MMS22L,MOG,MST1R,NAMPT,NPHS1,NPY,NTN1,NTRK3,NUPR1,OSM,P4HB,PDK4,PHB,PTGS2,RET,SDC1,SERPINF1,SFRP2,SHMT2,SKA1,SKA3,SLC16A1,SLC1A2,SLC1A5,SLC40A1,SMAD7,SNAP25,SOCS3,STX1A,TBX21,TCP1,TF,TGFA,THBS2,TNFRSF8,TNFSF10,T…	76
Cell-To-Cell Signaling and Interaction,Hematological System Development and Function,Immune Cell Trafficking,Inflammatory Response,Nervous System Development and Function	activation	Activation of microglia	7e-07	6.66e-05		0.255	0.046	ANXA2,APOE,C3,CXCL10,F2,HSPD1,IFNG,MFSD2A,MOG,PDK4,PTGS2,TREM2,VTN	13
Cell Morphology	polarization	Polarization of mononuclear leukocytes	7.13e-07	6.73e-05		1.239	0.817	CCL17,CCL19,CCL22,IFNG,IL12RB2,IL27,IRF4,NAMPT,NPY,SOCS3,TBX21	11
Cardiovascular System Development and Function,Organismal Development	vascularization	Vascularization of absolute anatomical region	7.74e-07	7.24e-05		-0.284	-0.52	ADAMTS1,APOE,C3,C6,IFNG,LIF,MMP7,NPY,PTGS2,RORA,SCG2,SERPINF1,SOCS3,TGFA,THBS2	15
Infectious Diseases	infection	Infection of mammalia	7.89e-07	7.32e-05	Decreased	-2.636	-2.121	APOE,ASGR2,BCL6,C3,CCR4,CLEC4E,CLEC6A,CXCL10,EIF2AK2,GZMA,HLA-DQB1,IFNG,IL12RB2,IRF4,JCHAIN,LBP,MMP7,MST1R,OLFM4,PTX3,RET,SDC1,SLAMF8,TBX21,TNFSF10	25
Cancer,Organismal Injury and Abnormalities	breast or colorectal cancer	Breast or colorectal cancer	8.3e-07	7.64e-05		1.765	1.718	ABCB1,ADAMTS1,ADAMTS4,ADAMTS5,AICDA,ALOX15,ALPK3,ALPL,ANK1,ANKRD22,ANXA1,ANXA2,APOD,APOE,AQP3,ART5,ATP2A1,BAK1,BATF2,BCL6,BYSL,C1QBP,C1QTNF6,C3,CCKAR,CCL17,CCL19,CCNA2,CCNB1,CCNE1,CCR10,CCR4,CCT5,CDC20,CDC25A,CDC25C,CDC6,CDH10,CEMIP,CKAP4,CLDN1,CLDN3,CLEC10A,CMPK2,CNN1,CNTN1,COL1A1,COL1A2,COL4A1,COL4A6,CPAMD8,CTSL,CTXN3,CUX2,CXCL10,CYP1A1,DCTPP1,DEPDC1B,DLGAP1,DLGAP3,DPEP2,DRAM1,DSCAML1,DTL,DUSP5…	217
Organismal Injury and Abnormalities,Reproductive System Disease	benign pelvic disease	Benign pelvic disease	8.58e-07	7.84e-05				AK2,APOE,BCL6,BYSL,CCL19,CCL22,CCNA2,CCR10,CEMIP,CLDN11,CNTN1,CXCL10,ELL2,FMOD,FST,GZMA,IFIT1,IFIT3,INSRR,LIF,MMP7,MST1R,NR3C2,PDK4,PTGS2,RORA,SCG2,SLC16A1,SMAD7,SOCS3,STRA6,THBS2,TK1,TPBG,TREM2,VCAN,XCL1	37
Organismal Injury and Abnormalities,Tissue Morphology	morphology	Morphology of lesion	9.09e-07	8.24e-05				ALOX15,ANXA1,APOD,APOE,BAK1,C3,CCL19,CCNE1,F2,FABP4,FAIM2,HSPH1,IFNG,IL12RB2,IL18BP,MMP7,MOG,MST1R,NAMPT,NR3C2,OSM,PTGS2,PTX3,RET,SOCS3,STIP1,TGFA,TNFSF10,TXN	29
Tissue Morphology	quantity	Quantity of cells	9.26e-07	8.33e-05		0.77	0.216	ABCB1,ACHE,ADAMTS1,ADAMTS4,AICDA,ALOX15,ALPL,ANXA1,APOD,APOE,BAK1,BCL6,C3,C6,CCKAR,CCL19,CCL22,CCNA2,CCNB1,CCNE1,CCR4,CDC20,CDC25A,CHST1,CLEC10A,CLEC4A,CLEC4E,CNN1,COL1A1,CUX2,CXCL10,CYP1A1,DLGAP3,DUSP5,EIF2AK2,F2,FAIM2,FGF23,FST,GFRA2,GRID1,HLA-DQB1,HSPA5,HSPD1,IFNG,IL12RB2,IL18BP,IL27,IRF4,JCHAIN,KEL,LHX8,LIF,MMP7,MOG,MYBL1,MYMK,NPY,NR3C2,NTN1,NTRK3,OSM,PDK4,PGLYRP1,PTGS2,RET,RORA,SDC1,SDC3,SER…	88
Cell Morphology	polarization	Polarization of T lymphocytes	9.47e-07	8.4e-05		0.997	0.559	CCL17,CCL19,CCL22,IFNG,IL12RB2,IL27,IRF4,NPY,SOCS3,TBX21	10
Cell-To-Cell Signaling and Interaction,Cellular Movement,Immune Cell Trafficking	attraction	Attraction of leukocytes	9.47e-07	8.4e-05		1.313	0.775	ANXA1,C3,CCL17,CCL19,CCL22,CCR4,CXCL10,CXCL11,VCAN,XCL1	10
Cell-mediated Immune Response,Cellular Movement,Hematological System Development and Function,Immune Cell Trafficking	cell movement	Cell movement of T lymphocytes	1.02e-06	8.93e-05		0.86	0.466	AQP3,C3,C6,CCL17,CCL19,CCL22,CCL8,CCR4,COL1A1,COL4A1,CXCL10,CXCL11,HSPD1,IFNG,IL18BP,MOG,PTGS2,SOCS3,THBS2,TNFRSF8,XCL1	21
Organismal Injury and Abnormalities	growth	Growth of lesion	1.08e-06	9.42e-05		1.831	1.507	ADAMTS1,AICDA,ANXA1,ANXA2,APOE,BATF2,CCNE1,CGAS,CISD1,COL4A1,CXCL11,F2,FST,GZMA,HSPA5,HSPD1,HSPH1,IFNG,IL12RB2,IL27,IRF4,LIF,LRG1,LRRC4,MMP7,MST1R,NAMPT,NPY,NTRK3,NUPR1,OSM,PHB,PTGS2,PYCR1,RET,RORA,SDC1,SERPINF1,SFRP2,SLC13A5,SLC16A1,SLC1A5,SLC7A5,SMAD7,SOCS3,TGFA,TNFSF10,TRIM17,TUBB3,TXN,VCAN,XBP1	52
Cell-To-Cell Signaling and Interaction,Cellular Movement,Hematological System Development and Function,Immune Cell Trafficking	attraction	Attraction of T lymphocytes	1.11e-06	9.64e-05		0.574	0.128	CCL17,CCL19,CCL22,CCR4,CXCL10,CXCL11,XCL1	7
Nervous System Development and Function	morphology	Morphology of nervous system	1.14e-06	9.83e-05				ACHE,ADAMTS4,ALPL,ANXA1,APOE,BAK1,C3,CCKAR,CCR10,CDH10,CNTN1,COL1A1,CUX2,DLGAP3,DNER,F2,FAIM2,FRZB,FST,GFRA2,GFRA3,GRID1,HEPACAM,HSPA5,HSPD1,IFNG,KEL,LHX8,LIF,MFSD2A,MOG,MYH7B,NAMPT,NTN1,NTRK3,OSM,PAK5,PVALB,RET,RORA,SDC3,SLC1A2,SLC6A15,SNAP25,SNTA1,SPR,SRGAP3,STIP1,STRA6,STX1A,SYN1,TGFA,TREM2,UNC13A,VCAN	55
Cell-To-Cell Signaling and Interaction,Cellular Movement,Immune Cell Trafficking	attraction	Attraction of mononuclear leukocytes	1.2e-06	0.000102		0.929	0.466	ANXA1,CCL17,CCL19,CCL22,CCR4,CXCL10,CXCL11,XCL1	8
Cellular Movement,Hematological System Development and Function,Immune Cell Trafficking	cell movement	Cell movement of mononuclear leukocytes	1.2e-06	0.000102		1.326	0.878	ANXA1,ANXA2,APOE,AQP3,C3,C6,CCL17,CCL19,CCL22,CCL8,CCR10,CCR4,COL1A1,COL4A1,CXCL10,CXCL11,F2,HSPD1,IFNG,IL18BP,MOG,NTN1,OLFM4,OSM,PTGS2,SERPINF1,SOCS3,THBS2,TNFRSF8,TNFSF10,VIPR1,VTN,XCL1	33
Cellular Movement	cellular infiltration	Cellular infiltration by myeloid cells	1.25e-06	0.000105		-0.167	-0.368	ANXA1,ANXA2,APOE,C1QTNF6,C3,C6,CCL19,CXCL10,EDIL3,F2,FABP4,HSPA5,IFNG,LBP,MOG,NR3C2,NTN1,OLFM4,OSM,PDK4,PTGS2,PTX3,SMAD7,SOCS3,XCL1	25
Cellular Movement,Hematological System Development and Function,Immune Cell Trafficking	cellular infiltration	Cellular infiltration by granulocytes	1.25e-06	0.000105		-0.193	-0.368	ANXA1,ANXA2,APOE,C3,CCL19,CXCL10,EDIL3,F2,FABP4,IFNG,LBP,MOG,NTN1,OLFM4,OSM,PDK4,PTGS2,PTX3,SOCS3,XCL1	20
Cancer,Hematological Disease,Organismal Injury and Abnormalities	mature lymphocytic neoplasm	Mature lymphocytic neoplasm	1.33e-06	0.00011				ABCB1,AICDA,ALPL,ANXA1,ANXA2,APOE,BAK1,BCL6,BCL7A,C3,CCDC86,CCL17,CCL19,CCL22,CCL8,CCNB1,CCR4,CDC20,CDH10,CLEC4A,COL1A1,COL1A2,COL4A1,CTSL,CXCL10,CXCL11,DLGAP3,DNER,DUSP5,E2F7,FRZB,GRIK3,GZMB,HCAR3,HSP90AA1,HSPA12A,IFIT3,IFNG,IL12RB2,IRF4,JCHAIN,LIF,MEF2B,MST1R,MTHFD1L,MYO5B,NAMPT,OAS1,OAS2,POLQ,PTGES2,PTGS2,RET,SDC1,SEC24D,SERPINF1,SERPINH1,SHMT2,SLAMF8,SLC16A1,SMAD7,STIP1,STMN2,TBX21,TENT5C,TF,…	73
Cellular Movement,Hematological System Development and Function,Immune Cell Trafficking	cell movement	Cell movement of granulocytes	1.42e-06	0.000116		0.42	0.003	ANXA1,ANXA2,APOE,C1QBP,C3,CCL17,CCL19,CCL8,CXCL10,CXCL11,EDIL3,F2,FABP4,IFNG,LBP,MMP7,MOG,NTN1,OLFM4,OSM,PDK4,PTGS2,PTX3,SCG2,SOCS3,TXN,VTN,XCL1	28
Organismal Injury and Abnormalities,Tissue Morphology	size	Size of lesion	1.42e-06	0.000116				ALOX15,ANXA1,APOD,APOE,BAK1,C3,CCL19,CCNE1,F2,FABP4,FAIM2,HSPH1,IFNG,IL18BP,MOG,MST1R,NAMPT,NR3C2,OSM,PTGS2,PTX3,RET,SOCS3,STIP1,TGFA,TNFSF10,TXN	27
Cell-mediated Immune Response,Cellular Movement,Hematological System Development and Function,Immune Cell Trafficking,Inflammatory Response,Lymphoid Tissue Structure and Development	chemotaxis	Chemotaxis of T lymphocytes	1.5e-06	0.000122		0.878	0.467	CCL17,CCL19,CCL22,CCL8,CCR4,CXCL10,CXCL11,HSPD1,IFNG,SOCS3,THBS2,XCL1	12
Cellular Movement,Hematological System Development and Function,Immune Cell Trafficking	migration	Migration of mononuclear leukocytes	1.52e-06	0.000123		1.076	0.606	ANXA1,ANXA2,AQP3,C3,C6,CCL17,CCL19,CCL22,CCL8,CCR10,CCR4,COL1A1,COL4A1,CXCL10,CXCL11,F2,HSPD1,IFNG,IL18BP,MOG,NTN1,OSM,PTGS2,SERPINF1,SOCS3,THBS2,TNFRSF8,XCL1	28
Metabolic Disease,Organismal Injury and Abnormalities	glucose metabolism disorder	Glucose metabolism disorder	1.65e-06	0.000132		-1.549	-1.202	ACHE,ALOX15,ALPL,ANXA1,ANXA2,APOD,APOE,C1QTNF6,C3,CCL19,CCL22,CISD1,CLEC4A,CLEC6A,COL1A1,COL1A2,COL4A1,COL4A6,CTHRC1,CTSL,CUX2,CXCL10,EIF2AK2,F2,FABP3,FABP4,FGF23,FKBP4,GABRD,GBP6,GZMA,HCAR3,HK2,HLA-DQB1,HSD17B13,HSPA5,IFIT1,IFIT3,IFNG,IL18BP,INSRR,IRF4,KIRREL3,LBP,MCHR1,MOG,NPHS1,NPY,NR3C2,OAS1,OSM,P2RY1,PHB,PTGS2,RTP4,SERPINF1,SLC16A1,SMAD7,SOCS3,SYN1,TF,THBS2,TNFSF10,TXN,VIPR1,XBP1,XCL1,ZBP1	68
Cellular Development,Cellular Growth and Proliferation	cell proliferation	Cell proliferation of tumor cell lines	1.7e-06	0.000136	Increased	2.571	2.203	ABCB1,ACHE,ADAMTS1,ADAMTS4,ADAMTS5,AICDA,ANXA1,ANXA2,BAK1,BATF2,BCL6,C1QBP,CCL17,CCL22,CCNA2,CCNB1,CCNE1,CCR4,CDC25A,CDT1,CISD1,CKS2,CNN1,COL1A1,CXCL10,CYP1A1,DTL,DUSP5,EIF5A,EMILIN1,F2,FAIM2,FKBP4,FST,GZMB,HAS2,HK2,HSP90AA1,HSPA5,IFNG,IRF4,LIF,MASP1,MCM2,MMP7,MST1R,MYBL1,NAMPT,NDUFAF2,NMUR2,NPY,NTN1,NTRK3,OSM,PDK4,PHB,PTGS2,PYCR1,RASAL1,RET,RORA,S100A11,SDC1,SERPINF1,SHMT2,SLC13A5,SLC16A1,SLC1A5…	84
Cancer,Organismal Injury and Abnormalities,Reproductive System Disease	breast or gynecological cancer	Breast or gynecological cancer	1.73e-06	0.000137		0.64	0.602	ABCB1,ADAMTS1,ADAMTS4,ADAMTS5,AICDA,ALOX15,ALPK3,ALPL,ANK1,ANXA1,ANXA2,APOD,APOE,ART5,ASGR2,ATP2A1,BAK1,BCL6,BHLHA15,C16orf45,C1QBP,C3,C6,CA8,CCKAR,CCL17,CCL19,CCNA2,CCNB1,CCNE1,CCR4,CCT5,CCT6A,CDC20,CDC25A,CDC25C,CDC6,CDH10,CKAP4,CLDN1,CLDN3,CLEC10A,CLEC4F,CMPK2,CNN1,CNTN1,COL1A1,COL1A2,COL4A1,COL4A6,CPAMD8,CTSL,CTXN3,CUX2,CXCL10,CXCL11,CYP1A1,DCTPP1,DEPDC1B,DLGAP1,DNER,DTL,DUSP26,DUSP5,E2F7,EDE…	197
Gastrointestinal Disease,Inflammatory Response	inflammation	Inflammation of gastrointestinal tract	1.81e-06	0.000142		0.346	0.725	ABCB1,ALOX15,ANXA1,C3,CGAS,CLEC4A,COL1A1,COL1A2,CXCL10,FNDC4,GABRD,IFNG,JCHAIN,LBP,MMP7,OLFM4,PHB,PTGS2,RET,SMAD7,SOCS3,STRA6,TBX21,TF,TGFA,TKTL1,TRAM2,TRPM8,UBA7,VNN1,XBP1,XCL1	32
Cancer,Organismal Injury and Abnormalities,Reproductive System Disease	breast or ovarian cancer	Breast or ovarian cancer	1.82e-06	0.000142		0.64	0.586	ABCB1,ADAMTS1,ADAMTS4,ADAMTS5,AICDA,ALOX15,ALPL,ANXA1,APOD,APOE,ART5,ATP2A1,BAK1,BCL6,C1QBP,C3,CA8,CCL17,CCL19,CCNB1,CCNE1,CCR4,CCT5,CCT6A,CDC20,CDC25A,CDC6,CDH10,CKAP4,CLDN1,CLDN3,CLEC10A,CMPK2,CNN1,CNTN1,COL1A1,COL1A2,COL4A1,COL4A6,CTXN3,CUX2,CXCL10,CXCL11,CYP1A1,DCTPP1,DTL,DUSP5,E2F7,EFCAB12,EIF2AK2,ELOVL6,EMILIN1,ENTPD2,ERCC6L,F2,FABP4,FBP2,FNDC4,FRZB,GABRD,GFPT2,GPR75,GRID1,HAPLN3,HAS2,HERC5…	138
Cancer,Hematological Disease,Immunological Disease,Organismal Injury and Abnormalities	T-cell non-Hodgkin disease	T-cell non-Hodgkin lymphoma	1.86e-06	0.000144				ANXA1,BAK1,BCL6,C3,CCL19,CCL22,CCL8,CCR4,COL1A1,COL1A2,COL4A1,CXCL10,CXCL11,DUSP5,GZMB,HSP90AA1,IFIT3,IFNG,IRF4,LIF,MST1R,OAS1,OAS2,SDC1,SERPINF1,SERPINH1,SLAMF8,TBX21,TNFRSF8,TUBB3,VTN	31
Cellular Movement,Hematological System Development and Function,Immune Cell Trafficking,Inflammatory Response	cellular infiltration	Infiltration by neutrophils	1.88e-06	0.000144		-0.287	-0.443	ANXA1,ANXA2,APOE,C3,CXCL10,EDIL3,F2,FABP4,IFNG,LBP,MOG,NTN1,PDK4,PTGS2,PTX3,SOCS3,XCL1	17
Cellular Movement,Hematological System Development and Function,Immune Cell Trafficking,Inflammatory Response	cellular infiltration	Cellular infiltration by phagocytes	1.89e-06	0.000144		-0.048	-0.262	ANXA1,ANXA2,APOE,C1QTNF6,C3,C6,CCL19,CXCL10,EDIL3,F2,FABP4,HSPA5,IFNG,LBP,MOG,NR3C2,NTN1,PDK4,PTGS2,PTX3,SMAD7,SOCS3,XCL1	23
Cancer,Gastrointestinal Disease,Organismal Injury and Abnormalities	intestinal adenoma	Intestinal adenoma	1.92e-06	0.000146				ABCB1,ALOX15,BYSL,CCNB1,CEMIP,ISLR,JCHAIN,MMP7,NR3C2,NTMT1,PDK4,PPA1,PTGS2,S100A11,SKA3,SLC7A5,SORD,UBE2S	18
Cellular Function and Maintenance	ion homeostasis	Ion homeostasis of cells	2e-06	0.000151		0.927	0.535	ADAMTS1,ANK1,ANXA1,ANXA2,APOE,BAK1,C3,CCKAR,CCL17,CCL19,CCL22,CCL8,CCR10,CXCL10,DMP1,EIF5A,F2,FGF23,HSPA5,IFNG,KEL,MCHR1,NMUR2,NPY,NR3C2,P2RY1,PKHD1,SLC16A1,SLC40A1,SLC4A11,SNTA1,SYPL2,TF,TNFRSF8,TRPM8,VTN,XBP1	37
Organismal Survival	morbidity or mortality	Morbidity or mortality	2.06e-06	0.000154	Decreased	-2.478	-0.901	ABCB1,ACHE,ADAMTS1,ADAMTS4,AICDA,ALOX15,ALPL,ANXA1,ANXA2,APOD,APOE,ASGR2,ATP2A1,BAK1,BATF2,BCL6,BYSL,C1QBP,C3,CCDC86,CCL22,CCNA2,CCNE1,CCR10,CCR4,CDC20,CDC25A,CGAS,CKS2,CLDN1,CLEC4E,CLEC6A,CNTN1,COL4A1,CUX2,CXCL10,CXCL11,CYP1A1,DBNDD1,DTL,E2F7,EIF2AK2,ERCC6L,F2,FABP3,FGF23,FKBP4,FST,GABRD,GZMA,HAS2,HK2,HSP90AA1,HSPA5,IFNG,IL12RB2,INSRR,JCHAIN,LHX8,LIF,MAML3,MCM10,MCM2,MFSD2A,MMP7,MST1R,NPY,NR3C2,…	110
Cellular Movement,Hematological System Development and Function,Immune Cell Trafficking,Inflammatory Response	migration	Migration of macrophages	2.18e-06	0.000162		0.123	-0.22	ALOX15,BCL6,CCL19,CCL22,CXCL10,IFNG,NTN1,PTGS2,SDC1,TREM2,VCAN,VTN	12
Cancer,Organismal Injury and Abnormalities	growth	Growth of tumor	2.32e-06	0.000172		1.831	1.51	ADAMTS1,AICDA,ANXA1,ANXA2,BATF2,CCNE1,CGAS,CISD1,COL4A1,CXCL11,F2,FST,GZMA,HSPA5,HSPD1,HSPH1,IFNG,IL12RB2,IL27,IRF4,LIF,LRG1,LRRC4,MMP7,MST1R,NAMPT,NPY,NTRK3,NUPR1,OSM,PHB,PTGS2,PYCR1,RET,RORA,SDC1,SERPINF1,SFRP2,SLC13A5,SLC16A1,SLC1A5,SLC7A5,SMAD7,SOCS3,TGFA,TNFSF10,TRIM17,TUBB3,TXN,VCAN,XBP1	51
Cancer,Gastrointestinal Disease,Organismal Injury and Abnormalities	colorectal adenoma	Colorectal adenoma	2.37e-06	0.000175				ABCB1,ALOX15,BYSL,CCNB1,CEMIP,JCHAIN,MMP7,NR3C2,NTMT1,PDK4,PPA1,PTGS2,S100A11,SKA3,SLC7A5,SORD,UBE2S	17
Hematological System Development and Function,Inflammatory Response,Tissue Morphology	quantity	Quantity of neutrophils	2.4e-06	0.000175		0.463	0.51	ABCB1,ANXA1,C3,C6,CCR4,CLEC10A,CLEC4A,CLEC4E,CYP1A1,IFNG,IL18BP,MOG,PGLYRP1,RORA,SDC1,SOCS3,TF,TGFA,TNFSF10,VTN	20
Hematological System Development and Function,Immune Cell Trafficking,Inflammatory Response,Tissue Development	accumulation	Accumulation of phagocytes	2.42e-06	0.000176		0.342	0.156	ANXA1,APOE,C3,C6,CXCL10,DSC1,EDIL3,IFNG,IRF4,MMP7,MOG,PTX3,SMAD7,TNFSF10,XBP1	15
Cardiovascular Disease,Organismal Injury and Abnormalities	abdominal aortic aneurysm	Abdominal aortic aneurysm	2.43e-06	0.000176		0.192	0.134	APOE,COL1A1,CTSL,CXCL10,IFNG,MMP7,PTGS2,SDC1	8
Cardiovascular System Development and Function,Organismal Development,Visual System Development and Function	vascularization	Vascularization of eye	2.55e-06	0.000181		-0.077	-0.245	ADAMTS1,APOE,C3,C6,IFNG,LIF,MMP7,PTGS2,RORA,SCG2,SERPINF1,SOCS3,TGFA	13
Endocrine System Development and Function,Molecular Transport,Small Molecule Biochemistry	secretion	Secretion of hormone	2.55e-06	0.000181		-1.839	-1.949	ANXA1,CCKAR,FGF23,FST,LIF,MCHR1,NPY,OSM,P2RY1,PHB,SNAP25,STX1A,TGFA	13
Connective Tissue Development and Function,Tissue Development	growth	Growth of connective tissue	2.55e-06	0.000181		0.707	0.335	ANXA2,CCNA2,CCNB1,CCNE1,CDC6,CLEC4A,COL1A1,CTHRC1,DMP1,EIF2AK2,ERCC6L,F2,FGF23,FST,GP2,HAS2,IFNG,LIF,MMP7,MST1R,NPY,NTRK3,NUPR1,OSM,PTGS2,RET,S100A11,SERPINF1,SERPINH1,SMAD7,SOCS3,STIP1,TF,TGFA,TNFSF10,TREM2,TXN,VCAN,VTN,XBP1	40
Cell-To-Cell Signaling and Interaction,Cellular Movement	attraction	Attraction of cells	2.6e-06	0.000184		1.51	0.962	ANXA1,C3,CCL17,CCL19,CCL22,CCR4,CXCL10,CXCL11,NTN1,SCG2,VCAN,XCL1	12
Lipid Metabolism,Molecular Transport,Small Molecule Biochemistry	release	Release of lipid	2.66e-06	0.000187		0.052	-0.39	ABCB1,ANXA1,APOD,APOE,BCL6,C3,F2,FABP4,IFNG,NAMPT,NPY,PLA2G4F,PTGS2,SNTA1,STRA6,SYN1,TGFA,TNFSF10	18
Cellular Movement	cell movement	Cell movement of tumor cell lines	2.77e-06	0.000193	Increased	3.015	2.468	ADAMTS5,ANXA1,ANXA2,C1QBP,C3,CCL17,CCL19,CCL22,CCL8,CCR4,CLDN1,CLDN3,CNN1,COL1A1,CTSL,CXCL10,CXCL11,DRAM1,DUSP5,EIF2AK2,F2,FAIM2,GZMB,HAS2,HSP90AA1,IFNG,LAMB3,LIF,MMP7,MOV10L1,MST1R,MYBPH,NTN1,NTRK3,OSM,PHB,PTGS2,PTPRH,RET,S100A11,SDC1,SDC3,SEMA3C,SERPINF1,SLC16A1,SOCS3,TGFA,THBS2,TNFRSF8,TNFSF10,TRPM8,TXN,VCAN,VTN,XCL1	55
Cellular Movement,Hematological System Development and Function,Immune Cell Trafficking,Inflammatory Response	cell movement	Cell movement of monocytes	2.87e-06	0.000199		-0.194	-0.585	ANXA1,ANXA2,APOE,CCL17,CCL19,CCL22,CCL8,COL1A1,COL4A1,CXCL10,F2,IFNG,MOG,NTN1,SERPINF1,VIPR1	16
Vitamin and Mineral Metabolism	metabolism	Metabolism of vitamin	3.08e-06	0.000211		-0.534	-0.869	APOE,CXCL10,CYP1A1,FGF23,GPC2,IFNG,LIF,MTHFD1L,SDC1,SDC3,SHMT2,SLC23A1,STRA6,TKTL1	14
Cell-To-Cell Signaling and Interaction,Nervous System Development and Function	activation	Activation of neuroglia	3.08e-06	0.000211		0.388	0.171	ANXA2,APOE,C3,CCL22,CXCL10,F2,HSPD1,IFNG,MFSD2A,MOG,PDK4,PTGS2,TREM2,VTN	14
Cell Death and Survival	cell death	Cell death of tumor cell lines	3.3e-06	0.000224		-1.756	-1.606	ABCB1,ACHE,ALOX15,ANXA2,APOE,ATP2A1,BAK1,BCL6,CCNB1,CCNE1,CCT5,CCT6A,CDC20,CDC25A,CDC25C,CDC6,CDT1,CKS2,COL1A1,COL4A1,DRAM1,DTL,EIF2AK2,EIF5A,FAIM2,FST,GZMB,HK2,HLA-DQB1,HSPA5,HSPD1,IFNG,IRF4,LARP1B,LIF,MANF,MCM10,MMP7,MMS22L,MST1R,MYBL1,NAMPT,NPY,NR3C2,NTN1,NTRK3,NUPR1,OSM,P4HB,PGLYRP1,PHB,PLD5,PTGS2,RET,RNASE1,S100A11,SDC1,SERPINF1,SFRP2,SKA3,SLC9B2,SMAD7,SOCS3,TCP1,TF,TGFA,TK1,TNFRSF8,TNFSF10,…	78
Cellular Movement,Hematological System Development and Function,Immune Cell Trafficking	migration	Lymphocyte migration	3.32e-06	0.000224		0.986	0.522	ANXA1,AQP3,C3,C6,CCL17,CCL19,CCL22,CCL8,CCR10,CCR4,COL1A1,COL4A1,CXCL10,CXCL11,F2,HSPD1,IFNG,IL18BP,MOG,NTN1,OSM,PTGS2,SOCS3,THBS2,TNFRSF8,XCL1	26
Cancer,Organismal Injury and Abnormalities	development	Development of malignant tumor	3.49e-06	0.000234		-0.42	-0.256	ABCB1,ADAMTS1,ADAMTS4,ADAMTS5,AICDA,ALOX15,ALPK3,ALPL,ANK1,ANKRD22,ANXA1,ANXA2,APOD,APOE,ART5,ASGR2,ATP2A1,BAK1,BATF2,BCL6,BHLHA15,BPIFB3,C1QBP,C1QTNF6,C3,C6,CA8,CCKAR,CCNA2,CCNB1,CCNE1,CCR10,CCR4,CCT5,CCT6A,CDC20,CDC25A,CDC25C,CDC6,CDH10,CHST1,CKAP4,CKS2,CLDN3,CNN1,CNTN1,COL1A1,COL1A2,COL4A1,COL4A6,CPAMD8,CPNE7,CTHRC1,CTSL,CTXN3,CUX2,CXCL11,CYP1A1,DDO,DEPDC1B,DLGAP1,DLGAP3,DNER,DPEP2,DRAM1,DSCAM…	251
Gastrointestinal Disease,Organismal Injury and Abnormalities	colorectal disorder	Colorectal disorder	3.72e-06	0.000249		0.97	1.135	ABCB1,ADAMTS1,ADAMTS4,AICDA,ALOX15,ALPK3,ALPL,ANK1,ANKRD22,ANXA1,ANXA2,APOD,AQP3,ART5,ATP2A1,BAK1,BATF2,BCL6,BYSL,C1QBP,C1QTNF6,C3,CCKAR,CCNA2,CCNB1,CCR10,CCR4,CCT5,CDC25C,CDC6,CDH10,CEMIP,CKAP4,CLDN1,CLDN3,CNN1,CNTN1,COL1A1,COL1A2,COL4A1,COL4A6,CPAMD8,CPNE7,CTSL,CUX2,CXCL10,DEPDC1B,DLGAP1,DLGAP3,DPEP2,DRAM1,DSCAML1,DUSP5,E2F7,EDEM3,EDIL3,EIF2AK2,ELFN2,EMILIN1,ENTPD2,EPHX4,F2,FABP4,FAM155A,FAM209…	189
Cellular Development,Digestive System Development and Function,Hepatic System Development and Function	differentiation	Differentiation of liver	3.95e-06	0.000263		1.709	1.462	E2F7,FGF23,FRZB,IFNG,OSM,SMAD7,SOCS3,XBP1	8
Cell-To-Cell Signaling and Interaction,Cellular Movement,Hematological System Development and Function,Immune Cell Trafficking	recruitment	Recruitment of leukocytes	4.11e-06	0.000271		0.248	-0.18	ALOX15,ANXA1,APOE,C3,CCL17,CCL19,CCL22,CCR4,CLEC10A,CLEC4E,CXCL10,CXCL11,CYP1A1,EDIL3,IFNG,LIF,MOG,NTN1,OSM,PTX3,SDC1,THBS2,TNFRSF8,TXN	24
Cell-To-Cell Signaling and Interaction,Cellular Movement,Immune Cell Trafficking	attraction	Attraction of natural killer cells	4.14e-06	0.000272		0.988	0.623	CCL22,CXCL10,CXCL11,XCL1	4
Carbohydrate Metabolism	flux	Flux of carbohydrate	4.33e-06	0.000281		-1.664	-2.032	ABCB1,APOE,FGF23,IFNG,NPY,PTGS2	6
Cell-mediated Immune Response,Cellular Movement,Hematological System Development and Function,Immune Cell Trafficking	migration	Migration of CD4+ T-lymphocytes	4.33e-06	0.000281		1.026	0.784	AQP3,CCL17,CCL19,CCR4,CXCL10,CXCL11	6
Cancer,Organismal Injury and Abnormalities	advanced malignant tumor	Advanced malignant tumor	4.53e-06	0.000293		0.338	0.128	ABCB1,ADAMTS1,ALPL,ANXA1,ANXA2,APOE,BAK1,C1QBP,C3,CCL19,CCL8,CCNE1,CCR10,CCR4,CDC25A,CEMIP,CLDN3,CLEC6A,CNN1,COL4A1,CTHRC1,F2,FST,GABRD,HSP90AA1,IFNG,IL18BP,IRF4,ISLR,LAMB3,MEF2B,MMP7,MST1R,MTFR2,MYBPH,NTN1,NTRK3,P2RY1,PHB,PTGS2,PTPN4,PTX3,RET,RNASE1,S100A11,SDC1,SEMA3C,SERPINF1,SMAD7,SOCS3,STMN2,TBX21,TGFA,TNFRSF8,TUBB3,VCAN	56
Cardiovascular System Development and Function,Organismal Development,Visual System Development and Function	neovascularization	Neovascularization of eye	4.75e-06	0.000304		0.335	0.155	APOE,C3,C6,IFNG,LIF,MMP7,PTGS2,RORA,SCG2,SERPINF1,SOCS3,TGFA	12
Dermatological Diseases and Conditions,Inflammatory Disease,Organismal Injury and Abnormalities,Skeletal and Muscular Disorders	dermatomyositis	Dermatomyositis	4.75e-06	0.000304				C3,COL1A1,COL1A2,COL4A1,CXCL10,CXCL11,EMILIN1,IFIT3,RET,S100A11,SDC3,SERPINH1	12
Molecular Transport	release	Release of metal	4.99e-06	0.000317		1.784	1.393	ANXA1,BAK1,C3,CCKAR,CCL17,CCL19,F2,FAIM2,IFNG,LIF,OSM,P2RY1,S100A11,SLC40A1,TF,TRPM8,XCL1,ZDHHC21	18
Hematological System Development and Function,Tissue Morphology	quantity	Quantity of leukocytes	5.04e-06	0.000319		0.11	-0.271	ABCB1,ACHE,AICDA,ALOX15,ALPL,ANXA1,APOE,BAK1,BCL6,C3,C6,CCL19,CCL22,CCR4,CHST1,CLEC10A,CLEC4A,CLEC4E,CXCL10,CYP1A1,DUSP5,FGF23,HLA-DQB1,HSPD1,IFNG,IL12RB2,IL18BP,IL27,IRF4,JCHAIN,LIF,MOG,MYBL1,NPY,NR3C2,OSM,PGLYRP1,PTGS2,RORA,SDC1,SOCS3,TBX21,TF,TGFA,TNFRSF8,TNFSF10,TREM2,TXN,VTN,XBP1,XCL1	51
Gastrointestinal Disease,Inflammatory Disease	gastroenteritis	Gastroenteritis	5.1e-06	0.000321		0.407	0.758	ABCB1,ALOX15,ANXA1,C3,COL1A1,COL1A2,CXCL10,FNDC4,GABRD,IFNG,LBP,MMP7,OLFM4,PHB,PTGS2,RET,SMAD7,SOCS3,STRA6,TBX21,TF,TGFA,TKTL1,TRAM2,TRPM8,UBA7,VNN1,XBP1,XCL1	29
Dermatological Diseases and Conditions,Organismal Injury and Abnormalities	chronic skin disorder	Chronic skin disorder	5.25e-06	0.000326				APOE,C1QBP,C3,CCT5,CNN1,CTSL,DSC1,EIF5A,ELL2,HSPH1,IFIT1,MALL,MANF,PHB,S100A11	15
Cancer,Organismal Injury and Abnormalities	lymphoid cancer	Lymphoid cancer	5.26e-06	0.000326		-1.542	-1.432	ABCB1,ACHE,AICDA,ALPL,ANXA1,ANXA2,APOE,BAG2,BAK1,BCL6,BCL7A,C3,CCDC86,CCL17,CCL19,CCL22,CCL8,CCNA2,CCNB1,CCR4,CDC20,CDH10,CLEC4A,COL1A1,COL1A2,COL4A1,CTSL,CXCL10,CXCL11,CYP1A1,DLGAP3,DNER,DUSP5,E2F7,F2,FRZB,GRIK3,GZMB,HCAR3,HK2,HSP90AA1,HSPA12A,HSPA5,IFIT3,IFNG,IL12RB2,IRF4,JCHAIN,LAMB3,LIF,MEF2B,MST1R,MTHFD1L,MYO5B,NAMPT,NTN1,NTRK3,OAS1,OAS2,POLQ,PTGES2,PTGS2,RET,SDC1,SEC24D,SERPINF1,SERPINH1,SH…	85
Cancer,Organismal Injury and Abnormalities	metastasis	Secondary tumor	5.26e-06	0.000326		0.338	0.129	ABCB1,ADAMTS1,ALPL,ANXA1,ANXA2,APOE,C1QBP,C3,CCL19,CCL8,CCNE1,CCR10,CCR4,CDC25A,CEMIP,CLDN3,CLEC6A,CNN1,COL4A1,CTHRC1,F2,FST,HSP90AA1,IFNG,IL18BP,IRF4,ISLR,LAMB3,MEF2B,MMP7,MST1R,MYBPH,NTN1,NTRK3,P2RY1,PHB,PTGS2,PTPN4,PTX3,RET,RNASE1,S100A11,SDC1,SERPINF1,SMAD7,SOCS3,STMN2,TBX21,TGFA,TNFRSF8,TUBB3,VCAN	52
Cancer,Organismal Injury and Abnormalities	neoplasia	Lymphatic system tumor	5.6e-06	0.000345		-1.542	-1.443	ABCB1,ACHE,AICDA,ALPL,ANXA1,ANXA2,APOE,BAG2,BAK1,BCL6,BCL7A,C3,CCDC86,CCL17,CCL19,CCL22,CCL8,CCNA2,CCNB1,CCR4,CDC20,CDH10,CLEC4A,COL1A1,COL1A2,COL4A1,CTSL,CXCL10,CXCL11,CYP1A1,DLGAP3,DNER,DUSP5,E2F7,F2,FRZB,GRIK3,GZMB,HCAR3,HK2,HSP90AA1,HSPA12A,HSPA5,IFIT3,IFNG,IL12RB2,IRF4,JCHAIN,LAMB3,LIF,MEF2B,MST1R,MTHFD1L,MYO5B,NAMPT,NTN1,NTRK3,OAS1,OAS2,PLEKHH1,POLQ,PTGES2,PTGS2,RET,SDC1,SEC24D,SERPINF1,SER…	86
Molecular Transport	transport	Transport of metal	5.64e-06	0.000346		-1.383	-1.616	ABCB1,ANK1,ATP2A1,BHLHA15,CCL8,CISD1,CNTN1,CXCL10,F2,FGF23,FKBP4,IFNG,KCNN1,NMUR1,NMUR2,NPY,NR3C2,OSM,PHB,SLC1A2,SLC23A1,SLC40A1,SLC4A11,SLC7A5,SLC9B2,TF,TRPM8	27
Cell Death and Survival	apoptosis	Apoptosis of skin cell lines	5.92e-06	0.000359				BAK1,HSPD1,PTGS2,SERPINF1,TNFSF10	5
Cell Cycle	interphase	Re-entry into interphase of tumor cell lines	5.92e-06	0.000359		1.977	1.744	CCNE1,CDC25A,CDC25C,TF,TGFA	5
Cell-To-Cell Signaling and Interaction	binding	Binding of lymphatic system cells	6.17e-06	0.000372		0.589	0.211	ANXA1,ANXA2,APOE,CCL17,CCL19,CCL22,CLEC10A,CXCL10,CXCL11,F2,IFNG,LIF,NPY,NTN1,OSM,THBS2	16
Cancer,Hematological Disease,Immunological Disease,Organismal Injury and Abnormalities	neoplasia	Neoplasia of leukocytes	6.5e-06	0.00039		-1.977	-1.866	ABCB1,ACHE,AICDA,ALPL,ANXA1,ANXA2,APOE,BAG2,BAK1,BCL6,BCL7A,C3,CCDC86,CCL17,CCL19,CCL22,CCL8,CCNA2,CCNB1,CCR4,CDC20,CDH10,CLEC4A,COL1A1,COL1A2,COL4A1,CTSL,CXCL10,CXCL11,CYP1A1,DLGAP3,DNER,DUSP5,E2F7,F2,FRZB,GRIK3,GZMB,HCAR3,HK2,HSP90AA1,HSPA12A,HSPA5,IFIT3,IFNG,IL12RB2,IRF4,JCHAIN,LIF,MEF2B,MST1R,MTHFD1L,MYO5B,NAMPT,NTRK3,OAS1,OAS2,POLQ,PTGES2,PTGS2,RET,SDC1,SEC24D,SEMA3C,SERPINF1,SERPINH1,SHMT2,…	84
Cellular Development,Hematological System Development and Function,Lymphoid Tissue Structure and Development	maturation	Maturation of effector T lymphocytes	6.62e-06	0.000395				IFNG,IL27,IRF4	3
Cancer,Organismal Injury and Abnormalities	development	Development of carcinoma	6.8e-06	0.000402		-0.072	0.063	ABCB1,ADAMTS1,ADAMTS4,AICDA,ALOX15,ALPK3,ALPL,ANK1,ANKRD22,ANXA1,ANXA2,APOD,APOE,ART5,ASGR2,ATP2A1,BAK1,BATF2,BCL6,BHLHA15,BPIFB3,C1QBP,C1QTNF6,C3,C6,CA8,CCKAR,CCNA2,CCNB1,CCNE1,CCR10,CCR4,CCT5,CCT6A,CDC20,CDC25A,CDC25C,CDC6,CDH10,CHST1,CKAP4,CKS2,CLDN3,CNTN1,COL1A1,COL1A2,COL4A1,COL4A6,CPAMD8,CPNE7,CTSL,CTXN3,CUX2,CXCL11,CYP1A1,DDO,DEPDC1B,DLGAP1,DLGAP3,DNER,DPEP2,DRAM1,DSCAML1,DUSP26,DUSP5,E2F7…	247
Lipid Metabolism,Molecular Transport,Small Molecule Biochemistry	quantity	Quantity of polyunsaturated fatty acids	6.81e-06	0.000402		0.012	-0.278	ALOX15,APOD,APOE,CYP1A1,F2,HSPA5,IFNG,IL18BP,LIF,MFSD2A,NTN1,PTGS2,TGFA	13
Cancer,Gastrointestinal Disease,Hepatic System Disease,Organismal Injury and Abnormalities	hepatocellular carcinoma	Hepatocellular carcinoma	7.08e-06	0.000416		0.876	0.976	ADAMTS1,AICDA,ANXA1,BAG2,CCL19,CCNA2,CCNB1,CCNE1,CDC6,CKS2,CNTN1,CXCL10,DPEP2,E2F7,EIF2AK2,F2,GABRD,GPC2,HSP90AA1,HSPA5,HSPD1,JCHAIN,LIF,MCM2,MFAP4,MFSD2A,MMP7,NTN1,NUPR1,OSM,PDK4,POLQ,PTGS2,RET,RORA,SDS,SKA3,SOCS3,TBX21,TF,TGFA,TNFSF10,TUBB3,TXN,UBE2S,VCAN,ZIC2	47
Dermatological Diseases and Conditions,Organismal Injury and Abnormalities	alopecia areata	Alopecia areata	7.17e-06	0.000419				ANXA1,CXCL10,CXCL11,HR,IFNG,SNAP25	6
Organismal Injury and Abnormalities	ulcer	Ulcer	7.31e-06	0.000425				ABCB1,ANXA1,COL1A1,COL1A2,COL4A1,COL4A6,CTSL,F2,IFNG,MMP7,PTGS2,TGFA,XBP1	13
Cancer,Gastrointestinal Disease,Organismal Injury and Abnormalities	colorectal neoplasia	Colorectal tumor	7.34e-06	0.000425		1.432	1.475	ABCB1,ADAMTS1,ADAMTS4,AICDA,ALOX15,ALPK3,ALPL,ANK1,ANKRD22,ANXA1,ANXA2,APOD,AQP3,ART5,ATP2A1,BAK1,BATF2,BCL6,BYSL,C1QBP,C1QTNF6,C3,CCKAR,CCNA2,CCNB1,CCR10,CCR4,CCT5,CDC25C,CDC6,CDH10,CEMIP,CKAP4,CLDN1,CLDN3,CNN1,CNTN1,COL1A1,COL1A2,COL4A1,COL4A6,CPAMD8,CPNE7,CTSL,CUX2,CXCL10,DEPDC1B,DLGAP1,DLGAP3,DPEP2,DRAM1,DSCAML1,DUSP5,E2F7,EDEM3,EDIL3,EIF2AK2,ELFN2,EMILIN1,ENTPD2,EPHX4,F2,FABP4,FAM155A,FAM209…	187
Nervous System Development and Function,Neurological Disease	abnormal morphology	Abnormal morphology of nervous system	7.4e-06	0.000425				ACHE,ADAMTS4,ALPL,APOE,BAK1,C3,CCKAR,CCR10,CNTN1,CUX2,DLGAP3,DNER,F2,FRZB,FST,GFRA2,GFRA3,HEPACAM,HSPA5,HSPD1,IFNG,KEL,LHX8,LIF,MFSD2A,MOG,NTN1,NTRK3,OSM,PAK5,PVALB,RET,RORA,SLC1A2,SLC6A15,SNAP25,SNTA1,SPR,SRGAP3,STIP1,STRA6,STX1A,SYN1,TGFA,UNC13A,VCAN	46
Nutritional Disease	overweight disorder	Overweight disorder	7.41e-06	0.000425		1.355	1.374	ABCB1,ADAMTS1,APOE,C1QTNF6,C3,CCNA2,CCNB1,CISD1,CXCL10,CXCL11,F2,FABP4,GABRD,LBP,LIF,MCHR1,MFSD2A,MST1R,NAMPT,NMUR2,NPY,NTN1,P2RY1,PDK4,PHB,PTGS2,SDC1,SDC3,SERPINF1,SLC13A5,SOCS3,SRXN1,TXN	33
Cellular Movement,Hematological System Development and Function,Immune Cell Trafficking	cellular infiltration	Cellular infiltration by mononuclear leukocytes	7.51e-06	0.000428		0.715	0.579	APOE,C3,C6,CCL19,CCL22,CCR4,CXCL10,IFNG,IL18BP,MOG,NTN1,OLFM4,OSM,PTGS2,TNFRSF8,TNFSF10,XCL1	17
Hematological System Development and Function,Tissue Morphology	quantity	Quantity of blood cells	7.68e-06	0.000436		-0.217	-0.591	ABCB1,ACHE,AICDA,ALOX15,ALPL,ANXA1,APOE,BAK1,BCL6,C3,C6,CCL19,CCL22,CCR4,CHST1,CLEC10A,CLEC4A,CLEC4E,CXCL10,CYP1A1,DUSP5,EIF2AK2,F2,FGF23,HLA-DQB1,HSPD1,IFNG,IL12RB2,IL18BP,IL27,IRF4,JCHAIN,KEL,LIF,MOG,MYBL1,NPY,NR3C2,OSM,PGLYRP1,PTGS2,RORA,SDC1,SOCS3,TBX21,TF,TGFA,THBS2,TNFRSF8,TNFSF10,TREM2,TXN,VTN,XBP1,XCL1	55
Cell-To-Cell Signaling and Interaction	adhesion	Adhesion of lymphatic system cells	7.85e-06	0.000444		0.806	0.393	ANXA1,ANXA2,APOE,CCL17,CCL19,CCL22,CXCL11,F2,IFNG,LIF,NTN1,OSM,THBS2	13
Cellular Movement,Immune Cell Trafficking,Lymphoid Tissue Structure and Development	chemotaxis	Chemotaxis of splenocytes	8.15e-06	0.000458		-1.091	-1.454	CCL17,CCL19,CCL22,CCR4	4
Gastrointestinal Disease,Inflammatory Disease,Inflammatory Response,Organismal Injury and Abnormalities	inflammation	Inflammation of large intestine	8.2e-06	0.000459		0.518	0.776	ABCB1,ALOX15,ANXA1,C3,COL1A1,COL1A2,CXCL10,FNDC4,GABRD,IFNG,LBP,MMP7,PHB,PTGS2,RET,SMAD7,SOCS3,STRA6,TBX21,TF,TGFA,TKTL1,TRAM2,TRPM8,UBA7,XBP1	26
Dermatological Diseases and Conditions,Organismal Injury and Abnormalities	psoriasis	Chronic psoriasis	8.42e-06	0.000469				APOE,C1QBP,CCT5,CNN1,CTSL,EIF5A,ELL2,HSPH1,IFIT1,MALL,MANF,PHB,S100A11	13
Organismal Injury and Abnormalities,Reproductive System Disease	endometriosis	Endometriosis	8.48e-06	0.00047				APOE,BCL6,BYSL,CCL19,CCL22,CCNA2,CCR10,CEMIP,CNTN1,CXCL10,ELL2,FST,GZMA,INSRR,LIF,MMP7,MST1R,NR3C2,PTGS2,SLC16A1,SMAD7,STRA6,THBS2,TK1,TREM2,XCL1	26
Molecular Transport	transport	Transport of molecule	8.54e-06	0.000471		0.219	-0.385	ABCB1,ACHE,ALOX15,ANK1,ANXA1,ANXA2,APOE,AQP3,ATP2A1,BHLHA15,C3,CCKAR,CCL8,CISD1,CLEC4E,CLEC6A,CNTN1,COL1A1,CXCL10,EIF5A,ELL2,F2,FABP3,FABP4,FGF23,FKBP4,FST,GRIK4,HAS2,HK2,HSPA5,IFNG,KCNN1,LBP,LIF,MCHR1,MFSD2A,MMP7,MX2,MYO5B,NMUR1,NMUR2,NPY,NR3C2,OSM,P2RY1,P4HB,PHB,PLA2G4F,PTGES2,PTGS2,RET,SCG2,SERPINF1,SLC13A5,SLC16A1,SLC1A2,SLC1A5,SLC23A1,SLC27A2,SLC40A1,SLC4A11,SLC6A15,SLC7A5,SLC9B2,SNAP25,SOCS…	77
Cellular Movement,Hematological System Development and Function,Immune Cell Trafficking,Inflammatory Response	cell movement	Cell movement of neutrophils	8.65e-06	0.000475		0.217	-0.191	ANXA1,ANXA2,APOE,C1QBP,C3,CCL19,CCL8,CXCL10,EDIL3,F2,FABP4,IFNG,LBP,MMP7,MOG,NTN1,PDK4,PTGS2,PTX3,SOCS3,TXN,VTN,XCL1	23
Cellular Development,Cellular Growth and Proliferation,Connective Tissue Development and Function,Skeletal and Muscular System Development and Function,Tissue Development	formation	Formation of osteoclasts	9.03e-06	0.000493		1.142	0.96	ANXA2,BCL6,CXCL11,CYP1A1,EIF2AK2,IFNG,IL27,LIF,PTGS2,SOCS3,TNFSF10,TXN,XBP1	13
Cancer,Organismal Injury and Abnormalities	neoplasia	Neoplasia of cells	9.43e-06	0.000513		-0.528	-0.66	ABCB1,ACHE,ADAMTS1,AICDA,AK2,ALPL,ANXA1,ANXA2,APOD,APOE,ART5,ATP2A1,BAG2,BAK1,BCL6,BCL7A,C16orf45,C3,C6,CCDC86,CCL17,CCL19,CCL22,CCL8,CCNA2,CCNB1,CCNE1,CCR4,CDC20,CDC25A,CDC6,CDH10,CELA1,CLEC4A,CLEC4F,CLEC6A,CMPK2,CNN1,CNTN1,COL1A1,COL1A2,COL4A1,CPAMD8,CPNE7,CTHRC1,CTSL,CXCL10,CXCL11,CYP1A1,DLGAP1,DLGAP3,DNER,DPEP2,DSCAML1,DUSP5,E2F7,EDIL3,EIF2AK2,EMILIN1,ENTPD2,F2,FABP4,FAM155A,FRZB,FST,GABRD,GP…	168
Immunological Disease	immediate hypersensitivity	Immediate hypersensitivity	9.67e-06	0.000523		0	-0.092	ANXA1,C3,CCL17,CCL22,CCNA2,CCR4,CDC25A,CPNE7,CTSL,FABP4,FKBP4,GZMB,IFNG,KEL,LBP,OSM,PDK4,PTGES2,PTGS2,S100A11,SOCS3,TNFRSF8,TNFSF10	23
Cell-To-Cell Signaling and Interaction,Cellular Movement	recruitment	Recruitment of cells	9.73e-06	0.000524		0.576	0.125	ALOX15,ANXA1,APOE,C3,CCL17,CCL19,CCL22,CCR4,CLEC10A,CLEC4E,CXCL10,CXCL11,CYP1A1,EDIL3,IFNG,LIF,MOG,NTN1,OSM,PTGS2,PTX3,SDC1,THBS2,TNFRSF8,TXN	25
Dermatological Diseases and Conditions,Immunological Disease,Organismal Injury and Abnormalities	pemphigus foliaceus	Pemphigus foliaceus	1.02e-05	0.000546				CXCL11,DUSP5,EIF2AK2,IFIT1,IFIT3,OAS1,OAS2,SCG2,TNFSF10	9
Lipid Metabolism,Molecular Transport,Small Molecule Biochemistry	secretion	Secretion of lipid	1.07e-05	0.00057		-0.878	-1.196	ABCB1,ANXA1,APOE,CCKAR,ELL2,F2,FABP4,FST,IFNG,NMUR2,NPY,PHB,PLA2G4F,PTGS2,RET,TGFA	16
Cellular Compromise,Cellular Function and Maintenance	endoplasmic reticulum stress response	Endoplasmic reticulum stress response	1.07e-05	0.000571		0.04	-0.043	ALOX15,ATP2A1,BAK1,BHLHA15,COL4A1,EIF2AK2,HSP90AA1,HSPA5,HSPD1,HSPH1,IFNG,P4HB,SDF2L1,SERPINH1,XBP1	15
Cancer,Hematological Disease,Organismal Injury and Abnormalities	lymphocytic neoplasm	Lymphocytic neoplasm	1.13e-05	0.000598		-1.977	-1.863	ABCB1,ACHE,AICDA,ALPL,ANXA1,ANXA2,APOE,BAG2,BAK1,BCL6,BCL7A,C3,CCDC86,CCL17,CCL19,CCL22,CCL8,CCNA2,CCNB1,CCR4,CDC20,CDH10,CLEC4A,COL1A1,COL1A2,COL4A1,CTSL,CXCL10,CXCL11,CYP1A1,DLGAP3,DNER,DUSP5,E2F7,F2,FRZB,GRIK3,GZMB,HCAR3,HK2,HSP90AA1,HSPA12A,HSPA5,IFIT3,IFNG,IL12RB2,IRF4,JCHAIN,LIF,MEF2B,MST1R,MTHFD1L,MYO5B,NAMPT,NTRK3,OAS1,OAS2,POLQ,PTGES2,PTGS2,RET,SDC1,SEC24D,SERPINF1,SERPINH1,SHMT2,SLAMF8,…	83
Connective Tissue Disorders,Organismal Injury and Abnormalities,Skeletal and Muscular Disorders	Dupuytren contracture	Dupuytren contracture	1.14e-05	0.000599				ADAMTS1,ADAMTS4,ADAMTS5,COL1A1,COL1A2,COL4A1,COL4A6,FST,MMP7	9
Cancer,Organismal Injury and Abnormalities,Reproductive System Disease	invasive breast cancer	Invasive breast cancer	1.16e-05	0.000606				ADAMTS1,ADAMTS4,ADAMTS5,ANXA1,APOD,CDC6,CNN1,COL1A2,CXCL10,E2F7,FABP4,GABRD,HSP90AA1,MCM2,NTRK3,PDK4,POLQ,PYCR1,RET,SKA3,TGFA,TUBB3	22
Embryonic Development,Organ Development,Organismal Development,Skeletal and Muscular System Development and Function,Tissue Development	formation	Formation of muscle	1.18e-05	0.000616		0.687	0.435	ACHE,ADAMTS4,ANXA1,APOE,CCNA2,CXCL10,F2,FMOD,FST,HAS2,HSP90AA1,IFNG,LIF,MEF2B,MOV10L1,MYMK,NPHS1,NTN1,PVALB,SDC1,SMAD7,STIP1,STRA6,SYPL2,TBX20,TXN	26
Cellular Movement,Hematological System Development and Function,Immune Cell Trafficking	trafficking	Trafficking of leukocytes	1.24e-05	0.000643		0.896	0.522	ANXA1,AQP3,CCL19,CCL22,CCR10,CCR4,CXCL10,IFNG	8
Molecular Transport	transport	Transport of metal ion	1.25e-05	0.000645		-1.078	-1.448	ATP2A1,BHLHA15,CCL8,CNTN1,CXCL10,F2,FGF23,FKBP4,KCNN1,NMUR1,NMUR2,NPY,NR3C2,PHB,SLC1A2,SLC23A1,SLC40A1,SLC4A11,SLC7A5,SLC9B2,TF,TRPM8	22
Hematological Disease,Immunological Disease	lymphoproliferative disorder	Lymphoproliferative disorder	1.26e-05	0.000648		-1.977	-1.858	ABCB1,ACHE,AICDA,ALPL,ANXA1,ANXA2,APOE,BAG2,BAK1,BCL6,BCL7A,C3,CCDC86,CCL17,CCL19,CCL22,CCL8,CCNA2,CCNB1,CCR4,CDC20,CDH10,CLEC4A,COL1A1,COL1A2,COL4A1,CTSL,CXCL10,CXCL11,CYP1A1,DLGAP3,DNER,DUSP5,E2F7,F2,FRZB,GRIK3,GZMB,HCAR3,HK2,HSP90AA1,HSPA12A,HSPA5,IFIT3,IFNG,IL12RB2,IRF4,JCHAIN,LIF,MEF2B,MST1R,MTHFD1L,MYO5B,NAMPT,NTRK3,OAS1,OAS2,POLQ,PTGES2,PTGS2,RET,SDC1,SEC24D,SERPINF1,SERPINH1,SHMT2,SLAMF8,…	83
Dermatological Diseases and Conditions,Immunological Disease,Inflammatory Disease,Inflammatory Response,Organismal Injury and Abnormalities	atopic dermatitis	Atopic dermatitis	1.27e-05	0.000653				ANXA1,C3,CCL17,CCL22,CCNA2,CCR4,CDC25A,CPNE7,CTSL,FABP4,FKBP4,GZMB,KEL,OSM,PDK4,PTGS2,S100A11,TNFRSF8,TNFSF10	19
Cardiovascular Disease	vascular lesion	Vascular lesion	1.33e-05	0.000679		0.142	0.175	ALOX15,APOE,COL1A1,CTSL,CXCL10,FABP4,GZMB,HAS2,IFNG,MMP7,NR3C2,PTGS2,PTX3,SDC1,SOCS3,TNFSF10,TREM2,VCAN,VNN1	19
Gastrointestinal Disease,Organismal Injury and Abnormalities	abnormality	Abnormality of large intestine	1.35e-05	0.000684		0.518	0.769	ABCB1,ALOX15,ANXA1,C3,COL1A1,COL1A2,CXCL10,FNDC4,GABRD,IFNG,LBP,MMP7,PHB,PTGS2,RET,SMAD7,SOCS3,STRA6,TBX21,TF,TGFA,TKTL1,TRAM2,TRPM8,UBA7,VIPR1,XBP1	27
Gastrointestinal Disease,Inflammatory Disease,Inflammatory Response,Organismal Injury and Abnormalities	enteritis	Enteritis	1.39e-05	0.000703		0.282	0.59	ABCB1,ALOX15,ANXA1,C3,COL1A1,COL1A2,CXCL10,FNDC4,GABRD,IFNG,LBP,MMP7,PHB,PTGS2,RET,SMAD7,SOCS3,STRA6,TBX21,TF,TGFA,TKTL1,TRAM2,TRPM8,UBA7,VNN1,XBP1	27
Lipid Metabolism,Molecular Transport,Small Molecule Biochemistry	concentration	Concentration of eicosanoid	1.4e-05	0.000708		-0.219	-0.468	ALOX15,APOD,APOE,CYP1A1,F2,HSPA5,IFNG,IL18BP,LIF,NTN1,PTGS2,TGFA	12
Cell-To-Cell Signaling and Interaction,Cellular Movement,Immune Cell Trafficking	attraction	Attraction of antigen presenting cells	1.41e-05	0.000708		0.721	0.274	CCL17,CCL19,CCL22,CXCL10,CXCL11,VCAN	6
Cancer,Organismal Injury and Abnormalities,Reproductive System Disease	invasive breast carcinoma	Invasive breast carcinoma	1.43e-05	0.000712				ADAMTS1,ADAMTS4,ADAMTS5,ANXA1,APOD,CDC6,CNN1,COL1A2,CXCL10,E2F7,FABP4,GABRD,HSP90AA1,MCM2,PDK4,POLQ,PYCR1,RET,SKA3,TGFA,TUBB3	21
Cancer,Organismal Injury and Abnormalities	malignant neoplasm of retroperitoneum	Malignant neoplasm of retroperitoneum	1.5e-05	0.000749				ABCB1,ADAMTS1,ADAMTS5,AICDA,ALPL,ANK1,ANXA1,ANXA2,APOD,ATP2A1,BPIFB3,C1QBP,CCL22,CCR10,CDC6,CDH10,CELA1,CMPK2,CNTN1,COL1A1,COL1A2,COL4A1,COL4A6,CPNE7,CTHRC1,CTSL,CTXN3,CXCL10,CYP1A1,DLGAP1,DLGAP3,DMP1,DNER,DSCAML1,E2F7,EDIL3,EIF2AK2,ELL2,F2,FABP4,FANCI,FIBIN,FKBP14,FMOD,GABRD,GP2,GRID1,GRIK3,GRIK4,GZMB,HAPLN3,HERC5,HS3ST3A1,HSP90AA1,IFIT3,IGLON5,IL12RB2,IL18BP,INSRR,KANK4,KCNN1,KDELR3,KIRREL3,LAM…	121
Cell Death and Survival	cell death	Neuronal cell death	1.54e-05	0.000763		-0.251	-0.215	ACHE,ALOX15,APOE,BAK1,CCNB1,CDC25A,CDC25C,F2,FAIM2,GFRA2,GFRA3,GZMB,HK2,HSPA5,HSPD1,HSPH1,IFNG,LIF,MMP7,MOG,NTN1,NTRK3,NUPR1,OSM,P4HB,PHB,PTGS2,RET,SERPINF1,SLC1A2,SNAP25,STIP1,STX1A,TCP1,TF,TGFA,TNFSF10,VSTM2L,XBP1	39
Cell-To-Cell Signaling and Interaction,Cellular Growth and Proliferation	stimulation	Stimulation of cells	1.56e-05	0.00077	Increased	2.438	1.87	ACHE,BTNL9,C3,CCL19,CCL22,CCNA2,CLEC4E,CXCL10,CXCL11,F2,HSPD1,IFNG,IL27,LIF,NPY,Nrgn,OSM,PTGS2,SLC1A5,STEAP1,TGFA,TNFSF10	22
Lipid Metabolism,Molecular Transport,Small Molecule Biochemistry	transport	Transport of fatty acid	1.57e-05	0.000773				APOE,FABP3,FABP4,MFSD2A,PLA2G4F,SLC13A5,SLC16A1,SLC27A2,STX1A	9
Cell-To-Cell Signaling and Interaction,Hematological System Development and Function	interaction	Interaction of mononuclear leukocytes	1.58e-05	0.000775		0.126	-0.259	ALOX15,ANXA1,CCL17,CCL19,CCL22,CLEC10A,CXCL10,CXCL11,F2,IFNG,LBP,LIF,NPY,NTN1,OSM,THBS2,TNFRSF8	17
Cancer,Organismal Injury and Abnormalities	benign connective or soft tissue neoplasm	Benign connective or soft tissue neoplasm	1.61e-05	0.000779				ACHE,AK2,CCNE1,CLDN11,COL1A1,COL1A2,COL4A1,COL4A6,FABP4,FMOD,IFIT1,IFIT3,MST1R,MYBL1,NR3C2,PDK4,PTGS2,RET,RORA,S100A11,SCG2,SOCS3,TPBG,TUBB3,VCAN	25
Immunological Disease,Inflammatory Disease	atopic disease	Atopic disease	1.61e-05	0.000779				ANXA1,C3,CCL17,CCL22,CCNA2,CCR4,CDC25A,CPNE7,CTSL,FABP4,FKBP4,GZMB,KEL,OSM,PDK4,PTGS2,S100A11,SOCS3,TNFRSF8,TNFSF10	20
Cell-To-Cell Signaling and Interaction,Cellular Movement,Immune Cell Trafficking	attraction	Attraction of dendritic cells	1.61e-05	0.000779		0.328	-0.079	CCL17,CCL19,CCL22,CXCL10,CXCL11	5
Cell Death and Survival	cell death	Cell death of neuroblastoma cell lines	1.62e-05	0.000779		0.565	0.624	ACHE,APOE,BAK1,CCT5,CCT6A,EIF2AK2,FAIM2,HSPA5,IFNG,NPY,RET,TCP1,TNFSF10,TXN,UBE2S,VTN	16
Cell Signaling,Cell-To-Cell Signaling and Interaction	cytokine and chemokine mediated signaling pathway	Cytokine and chemokine mediated signaling pathway	1.66e-05	0.000796				ALOX15,ANXA1,BCL6,CCL19,CCL22,COL1A2,CXCL10,HSP90AA1,IRF4,LBP,LIF,OSM,PTGS2,RORA,SDC1,SOCS3,STX1A	17
Organismal Survival	organismal death	Organismal death	1.67e-05	0.000798	Decreased	-2.441	-0.835	ABCB1,ACHE,ADAMTS1,ADAMTS4,ALOX15,ALPL,ANXA1,ANXA2,APOD,APOE,ASGR2,ATP2A1,BAK1,BCL6,BYSL,C1QBP,C3,CCDC86,CCL22,CCNA2,CCNE1,CCR10,CCR4,CDC20,CDC25A,CGAS,CKS2,CLDN1,CNTN1,COL4A1,CUX2,CXCL10,CXCL11,CYP1A1,DBNDD1,DTL,E2F7,EIF2AK2,ERCC6L,F2,FABP3,FGF23,FKBP4,FST,GABRD,GZMA,HAS2,HK2,HSP90AA1,HSPA5,IFNG,IL12RB2,INSRR,LHX8,LIF,MAML3,MCM10,MCM2,MFSD2A,MMP7,MST1R,NPY,NR3C2,NTN1,NTRK3,NUPR1,OSM,PHB,POLQ,PRD…	105
Cancer	hyperplasia	Hyperplasia of secretory structure	1.68e-05	0.000798		1.06	1.163	ANXA1,CCKAR,CCNE1,IFNG,MST1R,NR3C2,OSM,PTGS2,RET,RORA,SDC1,SNAP25,TGFA,TRPM8,WDR77	15
Cell-mediated Immune Response,Cellular Development,Cellular Function and Maintenance,Cellular Growth and Proliferation,Embryonic Development,Hematological System Development and Function,Hematopoiesis,Lymphoid Tissue Structure and Development,Organ Development,Organismal Development,Tissue Development	differentiation	Differentiation of Th17 cells	1.7e-05	0.000804		-0.689	-0.898	BCL6,CLEC4E,CLEC6A,IFNG,IL27,IRF4,LIF,RORA,SOCS3,TBX21,TNFRSF8	11
Cellular Movement,Hematological System Development and Function,Immune Cell Trafficking	cell movement	Cell movement of lymphocytes	1.72e-05	0.000811		0.958	0.543	ANXA1,AQP3,C3,C6,CCL17,CCL19,CCL22,CCL8,CCR10,CCR4,COL1A1,COL4A1,CXCL10,CXCL11,F2,HSPD1,IFNG,IL18BP,MOG,NTN1,OSM,PTGS2,SOCS3,THBS2,TNFRSF8,TNFSF10,XCL1	27
Cell Death and Survival	cell death	Cell death of CD4+ T-lymphocytes	1.73e-05	0.000811		1.342	1.373	BAK1,DRAM1,IFNG,IL27,MOG,TNFSF10	6
Cell-mediated Immune Response,Cellular Movement,Hematological System Development and Function,Immune Cell Trafficking	trafficking	Trafficking of T lymphocytes	1.73e-05	0.000811		1.342	1.011	AQP3,CCL22,CCR10,CCR4,CXCL10,IFNG	6
Gastrointestinal Disease,Inflammatory Disease,Inflammatory Response,Organismal Injury and Abnormalities	colitis	Colitis	1.77e-05	0.000825		0.906	1.13	ABCB1,ALOX15,ANXA1,C3,COL1A1,COL1A2,CXCL10,FNDC4,GABRD,IFNG,LBP,MMP7,PHB,PTGS2,RET,SMAD7,SOCS3,STRA6,TBX21,TF,TKTL1,TRAM2,TRPM8,UBA7,XBP1	25
Lipid Metabolism,Molecular Transport,Small Molecule Biochemistry	secretion	Secretion of eicosanoid	1.81e-05	0.00084		0.479	0.132	ANXA1,F2,FABP4,IFNG,NMUR2,PLA2G4F,PTGS2,RET	8
Humoral Immune Response,Protein Synthesis	quantity	Quantity of IgG	1.83e-05	0.000844		1.074	0.937	ABCB1,AICDA,BCL6,CCR4,CLEC4A,CLEC4E,CXCL10,HLA-DQB1,IFNG,IRF4,JCHAIN,MYBL1,POLQ,PTGS2,SDC1,TBX21,TNFSF10	17
Cancer,Organismal Injury and Abnormalities	extraadrenal retroperitoneal tumor	Extraadrenal retroperitoneal tumor	1.86e-05	0.000858				ABCB1,ADAMTS1,ADAMTS5,AICDA,ALPL,ANK1,ANXA1,ANXA2,APOD,ATP2A1,BHLHA15,BPIFB3,C1QBP,CCKAR,CCL22,CCR10,CDC6,CDH10,CELA1,CMPK2,CNTN1,COL1A1,COL1A2,COL4A1,COL4A6,CPNE7,CTHRC1,CTSL,CTXN3,CXCL10,CYP1A1,DLGAP1,DLGAP3,DMP1,DNER,DSCAML1,E2F7,EDIL3,EIF2AK2,ELL2,F2,FABP4,FAM155A,FANCI,FIBIN,FKBP14,FMOD,GABRD,GP2,GRID1,GRIK3,GRIK4,GZMB,HAPLN3,HERC5,HS3ST3A1,HSD17B13,HSP90AA1,IFIT3,IGLON5,IL12RB2,IL18BP,INSRR…	131
Cellular Movement	trafficking	Trafficking of cells	1.93e-05	0.000885		0.896	0.52	ANXA1,AQP3,CCL19,CCL22,CCR10,CCR4,CXCL10,EMILIN1,IFNG	9
Cell Death and Survival	cell death	Cell death of T lymphocytes	1.94e-05	0.000885		1.942	2.004	APOE,BAK1,CCDC86,CCL19,CCNB1,CLEC10A,COL1A1,CXCL10,DRAM1,DUSP5,GP2,GZMA,GZMB,IFNG,IL27,IRF4,MOG,SMAD7,TBX21,THBS2,TNFSF10,XCL1	22
Antimicrobial Response	inhibition	Inhibition of virus	1.95e-05	0.000885		0.621	0.26	CCL17,CCL22,EIF2AK2,GZMA,IFNG,IL27,LIF	7
Cell-To-Cell Signaling and Interaction,Cellular Assembly and Organization	cell-cell contact	Cell-cell contact	1.97e-05	0.000892		0.377	-0.007	ACHE,ALOX15,ANXA1,APOE,C1QBP,C3,CDH10,CLDN1,CLDN11,CLDN3,CNTN1,COL4A1,CUX2,DLGAP3,DSCAML1,F2,FST,IFNG,KIRREL3,LRRC4,MFSD2A,MYMK,NPHS1,NTN1,NTRK3,PKHD1,RET,SERPINF1,SNTA1,STIP1,STX1A,SYN1,THBS2,TPBG,TREM2,UNC13A,VNN1	37
Cancer	hyperplasia	Hyperplasia of tissue	1.98e-05	0.000894		0.04	0.214	APOE,C3,CCNA2,FST,IFNG,MMP7,MOV10L1,MYBL1,OSM,PTGS2,RET,RORA,SMAD7,SOCS3,TGFA,WDR77	16
DNA Replication, Recombination, and Repair	synthesis	Synthesis of DNA	2.02e-05	0.000908		0.591	0.322	APOE,CCNA2,CCNE1,CDC25A,CDC25C,CDT1,CXCL10,ELL3,F2,GINS2,IFNG,LIF,MMS22L,MYBL1,NTRK3,OSM,PTGS2,S100A11,SMAD7,STRA6,TF,TGFA,THBS2,TNFSF10,TXN,VTN	26
Cellular Assembly and Organization	formation	Formation of plasma membrane	2.05e-05	0.000917		0.259	-0.143	ACHE,CLDN1,CLDN11,CLDN3,CNTN1,COL4A1,CUX2,DLGAP3,F2,KIRREL3,LRRC4,NTN1,NTRK3,OSM,SMAD7,SNTA1,SYN1,THBS2,TPBG,UNC13A	20
Cellular Movement,Hematological System Development and Function,Immune Cell Trafficking,Inflammatory Response	chemotaxis	Chemotaxis of leukocytes	2.12e-05	0.000944		1.371	0.799	ANXA1,APOE,C1QBP,C3,CCL17,CCL19,CCL22,CCL8,CCR4,CXCL10,CXCL11,F2,HSPD1,IFNG,LBP,MMP7,SCG2,SLAMF8,SOCS3,THBS2,TXN,VIPR1,VTN,XCL1	24
Cell-To-Cell Signaling and Interaction	response	Response of mononuclear leukocytes	2.14e-05	0.000946		1.688	1.411	APOE,BAK1,CCL19,CXCL11,GZMB,HLA-DQB1,IFNG,IL12RB2,IL27,LIF,MOG,NAMPT,OSM,RET,SLC1A5,SOCS3,TBX21,VTN	18
Cell-mediated Immune Response,Cellular Movement,Hematological System Development and Function,Immune Cell Trafficking	infiltration	Infiltration by T lymphocytes	2.14e-05	0.000946		0.736	0.571	C3,C6,CCL19,CCL22,CCR4,CXCL10,IFNG,IL18BP,MOG,PTGS2,TNFRSF8,XCL1	12
Post-Translational Modification,Protein Folding	folding	Folding of protein	2.14e-05	0.000946				BAG2,CCT5,CCT6A,FKBP4,HSP90AA1,HSPA5,HSPA6,HSPD1,LMAN1,TCP1,TXN	11
Cellular Movement	migration	Migration of bone marrow cell lines	2.15e-05	0.000947		-0.577	-0.727	C3,CCL22,CCR4,CXCL10,CXCL11	5
Cell-To-Cell Signaling and Interaction	adhesion	Adhesion of blood cells	2.22e-05	0.000971		0.047	-0.387	ALOX15,ANXA1,APOE,C3,CCL17,CCL19,CCL22,CLEC10A,CXCL10,CXCL11,F2,GZMB,IFNG,LBP,LIF,NPY,NTN1,OSM,PTGS2,PTX3,THBS2,TNFRSF8,TREM2,TXN,VTN	25
Hematological System Development and Function,Tissue Morphology	quantity	Quantity of antigen presenting cells	2.25e-05	0.000983		-0.934	-1.102	APOE,BCL6,CCL19,CCL22,CCR4,CLEC4A,CLEC4E,CXCL10,IFNG,IL12RB2,IRF4,LIF,MOG,NPY,NR3C2,PGLYRP1,SOCS3,TBX21,TREM2,XBP1,XCL1	21
Cell-To-Cell Signaling and Interaction,Hematological System Development and Function	binding	Binding of mononuclear leukocytes	2.3e-05	0.000999		0.126	-0.25	ALOX15,ANXA1,CCL17,CCL19,CCL22,CLEC10A,CXCL10,CXCL11,F2,IFNG,LBP,LIF,NPY,NTN1,OSM,THBS2	16
Lipid Metabolism,Molecular Transport,Small Molecule Biochemistry	transport	Transport of lipid	2.34e-05	0.00101		0.445	0.07	ABCB1,ALOX15,APOE,F2,FABP3,FABP4,IFNG,LBP,MFSD2A,MMP7,OSM,PLA2G4F,SLC13A5,SLC16A1,SLC27A2,STRA6,STX1A,VNN1	18
Molecular Transport	transport	Transport of inorganic cation	2.35e-05	0.00101		-1.078	-1.457	ANK1,ATP2A1,BHLHA15,CCL8,CNTN1,CXCL10,F2,FGF23,FKBP4,KCNN1,NMUR1,NMUR2,NPY,NR3C2,PHB,SLC1A2,SLC23A1,SLC40A1,SLC4A11,SLC7A5,SLC9B2,TF,TRPM8	23
Cell-mediated Immune Response,Cellular Movement,Hematological System Development and Function,Immune Cell Trafficking	migration	Migration of Th2 cells	2.37e-05	0.00102				CCL17,CCL22,CCR4,IFNG	4
Cell-mediated Immune Response,Cellular Development,Cellular Function and Maintenance,Cellular Growth and Proliferation,Embryonic Development,Hematological System Development and Function,Hematopoiesis,Lymphoid Tissue Structure and Development,Organ Development,Organismal Development,Tissue Development	differentiation	Differentiation of Th9 cells	2.37e-05	0.00102		-0.192	-0.045	BCL6,IFNG,IL27,TBX21	4
Cell-To-Cell Signaling and Interaction,Inflammatory Response	immune response	Immune response of antigen presenting cells	2.41e-05	0.00103		1.127	0.778	ALOX15,ANXA1,C3,CCL19,CCL22,CLEC6A,HSP90AA1,IFNG,NTN1,PGLYRP1,PTX3,RORA,SOCS3,TREM2,VTN,XBP1	16
Connective Tissue Disorders,Immunological Disease,Inflammatory Disease,Organismal Injury and Abnormalities,Skeletal and Muscular Disorders	lupus erythematosus	Lupus erythematosus	2.44e-05	0.00104				ABCB1,ANXA1,APOE,BAK1,C3,CTSL,CXCL10,CXCL11,DUSP5,EIF2AK2,GZMA,GZMB,HCAR3,HERC5,HLA-DQB1,IFIT1,IFIT3,IFNG,OAS1,OAS2,PTGS2,SCG2,TNFSF10,XBP1,ZBP1	25
Endocrine System Disorders,Gastrointestinal Disease,Organismal Injury and Abnormalities	endocrine pancreatic dysfunction	Endocrine pancreatic dysfunction	2.48e-05	0.00105		-1.482	-1.488	ALOX15,ALPL,ANXA1,ANXA2,APOD,APOE,C1QTNF6,C3,CCL19,CCL22,CLEC4A,CLEC6A,COL1A1,COL1A2,COL4A1,COL4A6,CTSL,CUX2,CXCL10,FABP4,GABRD,GBP6,GZMA,HCAR3,HK2,HLA-DQB1,HSD17B13,HSPA5,IFIT1,IFIT3,IFNG,IL18BP,IRF4,KIRREL3,MCHR1,MOG,NPHS1,NPY,NR3C2,OAS1,P2RY1,PTGS2,RET,RTP4,SERPINF1,SMAD7,SOCS3,SYN1,TF,THBS2,TNFSF10,TXN,XBP1,XCL1,ZBP1	55
Cell Death and Survival,Neurological Disease,Organismal Injury and Abnormalities	cell death	Cell death of hippocampal cells	2.48e-05	0.00105		-1.426	-1.362	ACHE,APOE,BAK1,F2,MMP7,NTRK3,P4HB,SLC1A2,STIP1,TF	10
Cancer,Organismal Injury and Abnormalities	lymphohematopoietic cancer	Lymphohematopoietic cancer	2.51e-05	0.00105		-1.187	-1.117	ABCB1,ACHE,ADAMTS5,AICDA,ALOX15,ALPK3,ALPL,ANKRD22,ANXA1,ANXA2,APOE,BAG2,BAK1,BCL6,BCL7A,BTNL9,C3,C6,CCDC86,CCL17,CCL19,CCL22,CCL8,CCNA2,CCNB1,CCR4,CDC20,CDC25A,CDH10,CDT1,CLEC4A,COL1A1,COL1A2,COL4A1,COL4A6,CTSL,CUX2,CXCL10,CXCL11,CYP1A1,DLGAP3,DNER,DSC1,DUSP5,E2F7,EIF2AK2,ENTPD2,F2,FRZB,GABRD,GFPT2,GRIK3,GRIK4,GZMB,HAPLN3,HCAR3,HK2,HLA-DQB1,HSP90AA1,HSPA12A,HSPA5,HSPA6,HSPD1,IFIT1,IFIT3,IFNG,IL1…	124
Infectious Diseases	infection	Viral Infection	2.51e-05	0.00105		-0.642	-1.428	ABCB1,ADAMTS5,ANXA1,ANXA2,APOE,ASGR2,BAK1,C3,CCL17,CCL22,CCL8,CCNA2,CCR4,CHST1,CLDN3,CLEC10A,CLEC4A,CLEC4E,CTSL,CXCL10,CXCL11,CYP1A1,DDO,DDOST,DLGAP1,EDEM3,EIF2AK2,F2,GABRD,GZMA,HERC5,HLA-DQB1,HSP90AA1,HSPA5,HSPA6,HSPD1,IFIT1,IFIT3,IFNG,IL27,IRF4,JCHAIN,KEL,MPP2,MST1R,MX2,MYO5B,NDUFAF2,NTN1,OAS1,OAS2,P2RY1,PGLYRP1,PTGS2,PTX3,PVALB,RAB6B,SDC1,SOCS3,SPCS3,STAC2,STIP1,TBX21,TNFSF10,TOR2A,TRMT61A,TUB…	73
Lipid Metabolism,Small Molecule Biochemistry	metabolism	Fatty acid metabolism	2.51e-05	0.00105		0.98	0.422	ABCB1,ALOX15,ANXA1,APOE,CYP1A1,ELOVL6,F2,FABP3,FABP4,IFNG,IL27,LBP,LIF,MFSD2A,MMP7,NTN1,OSM,PDK4,PLA2G4F,PTGES2,PTGS2,PVALB,SLC13A5,SLC16A1,SLC27A2,SOCS3,STRA6,STX1A,TGFA,TNFSF10,TXN,VNN1,VTN,XBP1	34
Cell-mediated Immune Response,Cell-To-Cell Signaling and Interaction,Cellular Movement,Hematological System Development and Function,Immune Cell Trafficking	recruitment	Recruitment of memory T lymphocytes	2.61e-05	0.00108				CCL17,CCL22,CCR4	3
Cancer,Gastrointestinal Disease,Organismal Injury and Abnormalities,Tumor Morphology	progression	Progression of gastric carcinoma	2.61e-05	0.00108				APOE,COL1A1,COL1A2	3
Cell-To-Cell Signaling and Interaction,Cellular Growth and Proliferation,Nervous System Development and Function	induction	Induction of astrocytes	2.61e-05	0.00108				IFNG,LIF,OSM	3
Cell-To-Cell Signaling and Interaction,Hematological System Development and Function	interaction	Interaction of lymphocytes	2.7e-05	0.00111		0.449	0.068	ANXA1,CCL17,CCL19,CCL22,CLEC10A,CXCL10,CXCL11,F2,IFNG,LIF,NPY,NTN1,OSM,THBS2,TNFRSF8	15
Cancer,Organismal Injury and Abnormalities	thoracic cancer	Thoracic cancer	2.71e-05	0.00111		-1.019	-0.999	ABCB1,ACHE,ADAMTS1,AICDA,AK2,ANXA1,ANXA2,APOD,APOE,BCL6,C1QBP,CCKAR,CCL17,CCL19,CCL22,CCNA2,CCNB1,CCNE1,CDC20,CDC6,CDH10,CKS2,CLDN3,COL4A1,CPAMD8,CPNE7,CTXN3,CUX2,CYP1A1,DSCAML1,E2F7,EPHX4,F2,FABP4,FAIM2,GABRD,GFRA3,GRIK4,HLA-DQB1,HR,HSP90AA1,HSPD1,IFNG,IL12RB2,IRF4,KANK4,KDELR3,KEL,KRT35,LAMB3,LGR6,MCHR1,MCM2,MEF2B,MMP7,MOV10L1,MST1R,MYBL1,MYBPH,NAMPT,NPY,NTRK3,NUPR1,OLFM4,ORC1,P4HB,PDK4,PHB,PKH…	92
Cell Death and Survival,Nervous System Development and Function	cell viability	Cell viability of neurons	2.77e-05	0.00113		0.731	0.287	APOE,FAIM2,GFRA2,HK2,IFNG,LIF,MOG,NTN1,NTRK3,OSM,PHB,RET,SERPINF1,SLC1A2,SNAP25,STX1A,TGFA,XBP1	18
Cancer,Dermatological Diseases and Conditions,Hematological Disease,Immunological Disease,Organismal Injury and Abnormalities	non-Hodgkin cutaneous lymphoma	Non-Hodgkin cutaneous lymphoma	2.81e-05	0.00114				ANXA1,BAK1,BCL6,CCL8,CCR4,CXCL10,CXCL11,IRF4,OAS1,OAS2,TNFRSF8,TUBB3	12
Humoral Immune Response,Protein Synthesis	quantity	Quantity of IgG1	2.81e-05	0.00114		0.341	0.197	ABCB1,AICDA,CCR4,CLEC4A,HLA-DQB1,IFNG,IRF4,MYBL1,POLQ,PTGS2,SDC1,TNFSF10	12
Cancer,Organismal Injury and Abnormalities,Respiratory Disease	respiratory system tumor	Respiratory system tumor	2.85e-05	0.00115		-0.699	-0.68	ABCB1,ACHE,ADAMTS1,AICDA,AK2,ALOX15,ANXA1,ANXA2,APOD,APOE,BCL6,C1QBP,CCKAR,CCL17,CCL19,CCL22,CCNA2,CCNB1,CCNE1,CDC20,CDC6,CDH10,CKS2,CLDN3,CNTN1,COL1A2,COL4A1,CPAMD8,CPNE7,CTXN3,CUX2,CYP1A1,DSCAML1,E2F7,EDEM3,EDIL3,EPHX4,F2,FABP4,FAIM2,FAM155A,GABRD,GFRA3,GP2,GPC2,GRID1,GRIK4,HK2,HLA-DQB1,HR,HS3ST3A1,HSP90AA1,HSPD1,IFNG,IL12RB2,KANK4,KDELR3,KEL,KRT35,LAMB3,LGR6,LYPD1,MCHR1,MCM2,MEF2B,MMP7,MMS22L,…	110
Organismal Survival	survival	Survival of organism	2.85e-05	0.00115		-0.249	-0.597	ABCB1,ACHE,AICDA,ALOX15,ANXA1,APOE,BAK1,BCL6,C3,CCR4,CDC25A,CLEC10A,CNTN1,CXCL10,CXCL11,F2,FST,GZMA,HK2,IFNG,IL27,LBP,LIF,MCM2,MOG,NTRK3,P2RY1,PHB,PTGS2,PTX3,RET,SLC1A2,SLC40A1,SNAP25,SOCS3,STIP1,THBS2,TNFRSF8,TNFSF10,TREM2,TUBB3,XBP1	42
Cancer,Organismal Injury and Abnormalities	lymphohematopoietic neoplasia	Lymphohematopoietic neoplasia	2.91e-05	0.00117		-0.073	-0.013	ABCB1,ACHE,ADAMTS5,AICDA,ALOX15,ALPK3,ALPL,ANKRD22,ANXA1,ANXA2,APOE,BAG2,BAK1,BCL6,BCL7A,BTNL9,C3,C6,CCDC86,CCL17,CCL19,CCL22,CCL8,CCNA2,CCNB1,CCR4,CDC20,CDC25A,CDH10,CDT1,CLEC4A,COL1A1,COL1A2,COL4A1,COL4A6,CTSL,CUX2,CXCL10,CXCL11,CYP1A1,DLGAP3,DNER,DSC1,DUSP5,E2F7,EIF2AK2,ENTPD2,F2,FRZB,GABRD,GFPT2,GRIK3,GRIK4,GZMB,HAPLN3,HCAR3,HK2,HLA-DQB1,HSP90AA1,HSPA12A,HSPA5,HSPA6,HSPD1,IFIT1,IFIT3,IFNG,IL1…	125
Cellular Movement,Hematological System Development and Function,Immune Cell Trafficking,Inflammatory Response	chemotaxis	Chemotaxis of mononuclear leukocytes	2.99e-05	0.0012		0.791	0.318	ANXA1,CCL17,CCL19,CCL22,CCL8,CCR4,CXCL10,CXCL11,F2,HSPD1,IFNG,SOCS3,THBS2,VIPR1,XCL1	15
Molecular Transport	transport	Transport of carboxylic acid	3.11e-05	0.00124		1.357	0.982	ABCB1,APOE,FABP3,FABP4,MFSD2A,PLA2G4F,SLC13A5,SLC16A1,SLC23A1,SLC27A2,STX1A	11
Cancer,Gastrointestinal Disease,Organismal Injury and Abnormalities	colorectal cancer	Colorectal cancer	3.21e-05	0.00128		1.387	1.428	ABCB1,ADAMTS1,ADAMTS4,AICDA,ALOX15,ALPK3,ALPL,ANK1,ANKRD22,ANXA1,ANXA2,APOD,AQP3,ART5,ATP2A1,BAK1,BATF2,BCL6,BYSL,C1QBP,C1QTNF6,C3,CCKAR,CCNA2,CCR10,CCR4,CCT5,CDC25C,CDC6,CDH10,CEMIP,CKAP4,CLDN1,CLDN3,CNTN1,COL1A1,COL1A2,COL4A1,COL4A6,CPAMD8,CTSL,CUX2,CXCL10,DEPDC1B,DLGAP1,DLGAP3,DPEP2,DRAM1,DSCAML1,DUSP5,E2F7,EDEM3,EDIL3,EIF2AK2,ELFN2,EMILIN1,ENTPD2,EPHX4,F2,FABP4,FAM155A,FAM209B,FBP2,FGF23,FNDC…	181
Cell Death and Survival	cell death	Cell death of lymphoid cells	3.22e-05	0.00128		1.768	1.899	APOE,BAK1,CCDC86,CCL19,CCNB1,CLEC10A,COL1A1,CXCL10,DRAM1,DUSP5,EIF2AK2,GP2,GZMA,GZMB,HSPA5,IFNG,IL27,IRF4,MOG,SMAD7,TBX21,THBS2,TNFSF10,TXN,XCL1	25
Cell-To-Cell Signaling and Interaction,Cellular Function and Maintenance,Hematological System Development and Function	phagocytosis	Phagocytosis of granulocytes	3.25e-05	0.00129		1.508	1.188	ANXA1,C3,CLEC6A,CXCL10,IFNG,PTX3,TREM2,VTN	8
Cardiovascular Disease,Neurological Disease,Organismal Injury and Abnormalities	cerebrovascular dysfunction	Cerebrovascular dysfunction	3.36e-05	0.00132		0.152	0.188	ACHE,APOE,BCL6,CKAP4,COL4A1,F2,FABP3,GABRD,HCAR3,HSPH1,NPY,NR3C2,P2RY1,PTGS2,SLC16A6,SLC1A2,SNAP25,SNTA1,STIP1,THBS2,TUBB3	21
Cellular Development,Cellular Growth and Proliferation,Connective Tissue Development and Function,Tissue Development	development	Development of connective tissue cells	3.44e-05	0.00135		1.456	1.222	ANXA2,BCL6,CXCL11,CYP1A1,EIF2AK2,FRZB,FST,IFNG,IL27,LIF,PTGS2,SFRP2,SMAD7,SOCS3,TNFSF10,TXN,VCAN,VNN1,XBP1	19
Cell-To-Cell Signaling and Interaction,Hematological System Development and Function	binding	Binding of lymphocytes	3.46e-05	0.00135		0.449	0.074	ANXA1,CCL17,CCL19,CCL22,CLEC10A,CXCL10,CXCL11,F2,IFNG,LIF,NPY,NTN1,OSM,THBS2	14
Cellular Movement,Hematological System Development and Function,Immune Cell Trafficking,Inflammatory Response	migration	Migration of monocytes	3.46e-05	0.00135		-0.152	-0.424	ANXA2,CCL19,CCL22,CCL8,COL1A1,COL4A1,F2,IFNG,NTN1,SERPINF1	10
Cardiovascular Disease,Organismal Injury and Abnormalities	aortic aneurysm	Aortic aneurysm	3.47e-05	0.00135		0.179	0.231	APOE,COL1A1,CTSL,CXCL10,IFNG,MMP7,PTGS2,SDC1,VCAN	9
Cell-mediated Immune Response,Cell-To-Cell Signaling and Interaction,Cellular Movement,Hematological System Development and Function,Immune Cell Trafficking	recruitment	Recruitment of T lymphocytes	3.47e-05	0.00135		0.496	0.137	CCL17,CCL19,CCL22,CCR4,CXCL10,CXCL11,IFNG,OSM,TNFRSF8	9
Hematological System Development and Function,Immune Cell Trafficking,Inflammatory Response,Tissue Development	accumulation	Accumulation of granulocytes	3.6e-05	0.00139		0.245	0.073	ANXA1,CCL17,CXCL10,DSC1,EDIL3,IFNG,MMP7,OSM,PTX3,TNFSF10,XBP1	11
Lipid Metabolism,Small Molecule Biochemistry	synthesis	Synthesis of fatty acid	3.65e-05	0.0014		0.947	0.559	ALOX15,ANXA1,APOE,CYP1A1,ELOVL6,F2,IFNG,IL27,LIF,NTN1,OSM,PDK4,PLA2G4F,PTGES2,PTGS2,PVALB,SOCS3,TGFA,TNFSF10,TXN,VTN,XBP1	22
Cancer,Hematological Disease,Immunological Disease,Organismal Injury and Abnormalities	T-cell malignant neoplasm	T-cell malignant neoplasm	3.67e-05	0.0014				ACHE,ANXA1,BAK1,BCL6,C3,CCL17,CCL19,CCL22,CCL8,CCR4,COL1A1,COL1A2,COL4A1,CXCL10,CXCL11,DUSP5,GZMB,HSP90AA1,IFIT3,IFNG,IRF4,LIF,MST1R,OAS1,OAS2,RET,SDC1,SERPINF1,SERPINH1,SLAMF8,TBX21,TNFRSF8,TUBB3,VTN	34
Cell-To-Cell Signaling and Interaction,Cellular Growth and Proliferation,Nervous System Development and Function	stimulation	Stimulation of astrocytes	3.67e-05	0.0014				IFNG,LIF,OSM,TGFA	4
Cell Death and Survival	apoptosis	Apoptosis of thyroid tumor cell lines	3.69e-05	0.0014		0.92	0.935	BAK1,HSPA5,IFNG,RET,RNASE1,TNFSF10	6
Cellular Growth and Proliferation,Lymphoid Tissue Structure and Development	proliferation	Proliferation of lymphatic system cells	3.72e-05	0.00141		-0.054	-0.369	ACHE,ANXA1,APOE,BCL6,BTNL9,C1QBP,C3,CCL17,CCL19,CCL22,CCNB1,CDC25A,CLEC10A,CLEC4A,CXCL10,DUSP5,EIF2AK2,F2,FABP4,GP2,HLA-DQB1,HR,HSPA5,HSPD1,IFNG,IL12RB2,IL27,IRF4,LIF,MOG,MYBL1,NPY,OSM,PTGES2,PTGS2,SDC1,SMAD7,SOCS3,TBX21,TNFSF10,TXN,XCL1,ZBTB32	43
Cell-To-Cell Signaling and Interaction,Hematological System Development and Function	interaction	Interaction of T lymphocytes	3.87e-05	0.00146		0.307	-0.066	ANXA1,CCL17,CCL19,CCL22,CLEC10A,CXCL10,CXCL11,F2,IFNG,NPY,NTN1,THBS2,TNFRSF8	13
Cell Death and Survival	cell viability	Cell viability of tumor cell lines	3.91e-05	0.00147	Increased	2.36	1.629	ABCB1,ACHE,ADAMTS1,APOE,AQP3,BCL6,CCNA2,CCNB1,CLDN3,COL1A1,DUSP5,GFRA3,HK2,HSPA5,HSPA6,IFNG,INSRR,IRF4,LAMB3,LIF,LRFN1,MCM2,MMS22L,MST1R,NAMPT,NPY,NTN1,NTRK3,NUPR1,P4HB,PHB,PTGS2,RET,SDC1,SKA1,SKA3,SLC1A5,SLC40A1,SOCS3,TCP1,TF,TGFA,TNFSF10,TRPM8,TUBB3,TXN,VCAN,VTN	48
Nutritional Disease	obesity	Obesity	4.19e-05	0.00158		1.355	1.374	ADAMTS1,APOE,C1QTNF6,C3,CCNA2,CCNB1,CISD1,CXCL10,CXCL11,F2,FABP4,GABRD,LBP,LIF,MCHR1,MFSD2A,MST1R,NAMPT,NMUR2,NPY,NTN1,PDK4,PHB,PTGS2,SDC1,SDC3,SERPINF1,SLC13A5,SOCS3,SRXN1,TXN	31
Cellular Movement,Hematological System Development and Function,Immune Cell Trafficking,Inflammatory Response	cellular infiltration	Cellular infiltration by macrophages	4.25e-05	0.00159		-0.299	-0.491	ANXA1,APOE,C1QTNF6,C3,C6,CXCL10,F2,HSPA5,IFNG,MOG,NR3C2,PDK4,PTGS2,PTX3,SMAD7	15
Neurological Disease,Organismal Injury and Abnormalities	demyelination	Demyelination of spinal cord	4.38e-05	0.00163		-0.749	-0.824	C3,CXCL10,IFNG,IL12RB2,LIF,MOG	6
Cellular Development,Digestive System Development and Function,Hepatic System Development and Function	differentiation	Differentiation of liver cells	4.38e-05	0.00163	Increased	2.19	1.92	E2F7,FRZB,IFNG,OSM,SMAD7,XBP1	6
Cellular Development,Cellular Growth and Proliferation,Digestive System Development and Function,Hepatic System Development and Function,Organ Development	proliferation	Proliferation of liver cells	4.46e-05	0.00165		0.86	0.699	C3,CCNE1,COL1A1,F2,FST,IFNG,OSM,PTGS2,SERPINH1,SLC7A5,SMAD7,SOCS3,TF,TGFA,XBP1	15
Neurological Disease	demyelination	Demyelination of central nervous system	4.5e-05	0.00166		-0.792	-0.916	C3,CXCL10,HSPA5,IFNG,IL12RB2,LIF,MOG	7
Infectious Diseases	quantity	Quantity of virus	4.51e-05	0.00166		-1.935	-1.821	ANXA2,APOE,HSPA5,IFIT3,IFNG,IRF4,PTGS2,TNFSF10	8
Cancer,Organismal Injury and Abnormalities,Respiratory Disease	non-small cell lung cancer	Non-small cell lung carcinoma	4.57e-05	0.00168				ABCB1,ADAMTS1,AICDA,AK2,ANXA2,APOD,BCL6,C1QBP,CCKAR,CCNA2,CCNB1,CCNE1,CDC20,CDC6,CDH10,CKS2,CLDN3,COL4A1,CPNE7,CTXN3,CUX2,DSCAML1,E2F7,EPHX4,F2,FABP4,FAIM2,GABRD,GFRA3,GRIK4,HLA-DQB1,HR,HSP90AA1,HSPD1,IFNG,IL12RB2,KANK4,KEL,LGR6,MCHR1,MCM2,MOV10L1,MST1R,MYBL1,NAMPT,NPY,NTRK3,NUPR1,OLFM4,ORC1,P4HB,PDK4,PHB,PKHD1,PLA2G4F,POLQ,PPA1,PTGS2,PTPRH,RET,RNASE1,SCG2,SKA3,SLC6A15,SLC7A5,SRGAP3,TGFA,TK1,TUBB…	72
Inflammatory Response	inflammation	Inflammation of secretory structure	4.68e-05	0.00172		-1.572	-1.319	ANXA1,CLEC4A,CYP1A1,F2,GABRD,HLA-DQB1,HSPA5,IFNG,P4HB,PTGS2,TBX21,TK1,TXN,XBP1,XCL1	15
Endocrine System Disorders,Gastrointestinal Disease,Metabolic Disease,Organismal Injury and Abnormalities	diabetes mellitus	Diabetes mellitus	4.69e-05	0.00172		-1.482	-1.488	ALOX15,ALPL,ANXA1,ANXA2,APOD,APOE,C1QTNF6,C3,CCL19,CCL22,CLEC4A,CLEC6A,COL1A1,COL1A2,COL4A1,COL4A6,CTSL,CUX2,CXCL10,FABP4,GABRD,GBP6,GZMA,HCAR3,HK2,HLA-DQB1,HSD17B13,HSPA5,IFIT1,IFIT3,IFNG,IL18BP,IRF4,KIRREL3,MCHR1,MOG,NPHS1,NPY,NR3C2,OAS1,P2RY1,PTGS2,RTP4,SERPINF1,SMAD7,SOCS3,SYN1,TF,THBS2,TNFSF10,TXN,XBP1,XCL1,ZBP1	54
Cell Morphology,Nervous System Development and Function,Tissue Morphology	morphology	Morphology of neurons	4.74e-05	0.00173				ACHE,ADAMTS4,APOE,C3,CCKAR,CCR10,CDH10,CNTN1,F2,FAIM2,FST,GFRA2,GRID1,HSPD1,IFNG,KEL,LHX8,MOG,MYH7B,NAMPT,NTRK3,PAK5,PVALB,RET,SLC1A2,SLC6A15,SNTA1,SPR,SRGAP3,STIP1,STX1A,SYN1,TGFA,UNC13A,VCAN	35
Cancer,Hematological Disease,Organismal Injury and Abnormalities	hematologic cancer	Hematologic cancer	4.77e-05	0.00173		-1.563	-1.487	ABCB1,ACHE,ADAMTS5,AICDA,ALOX15,ALPK3,ALPL,ANKRD22,ANXA1,ANXA2,APOE,BAG2,BAK1,BCL6,BCL7A,BTNL9,C3,C6,CCDC86,CCL17,CCL19,CCL22,CCL8,CCNA2,CCNB1,CCR4,CDC20,CDC25A,CDH10,CDT1,CLEC4A,COL1A1,COL1A2,COL4A1,COL4A6,CTSL,CUX2,CXCL10,CXCL11,CYP1A1,DLGAP3,DNER,DSC1,DUSP5,E2F7,EIF2AK2,ENTPD2,F2,FRZB,GABRD,GFPT2,GRIK3,GRIK4,GZMB,HAPLN3,HCAR3,HK2,HLA-DQB1,HSP90AA1,HSPA12A,HSPA5,HSPA6,HSPD1,IFIT1,IFIT3,IFNG,IL1…	122
Molecular Transport	transport	Transport of cation	4.83e-05	0.00175		-1.386	-1.796	ABCB1,ANK1,ATP2A1,BHLHA15,CCL8,CNTN1,CXCL10,F2,FGF23,FKBP4,KCNN1,NMUR1,NMUR2,NPY,NR3C2,PHB,SLC1A2,SLC23A1,SLC40A1,SLC4A11,SLC7A5,SLC9B2,TF,TRPM8	24
Inflammatory Response,Respiratory Disease	inflammation	Inflammation of respiratory system component	4.84e-05	0.00175		0.626	0.742	ALOX15,ANXA1,APOE,BCL6,C3,CCL17,CCL22,CCR4,CXCL10,CXCL11,DRC1,F2,GZMA,GZMB,HSPA5,IFNG,LBP,OSM,P4HB,PTGS2,RET,RORA,RTKN2,SDC1,SHMT2,SMAD7,SOCS3,STRA6,TBX21,TGFA,THBS2,TK1,TNFRSF8,TNFSF10,TUBB3	35
Cardiovascular Disease,Neurological Disease,Organismal Injury and Abnormalities	stroke	Stroke	4.93e-05	0.00177				ACHE,APOE,BCL6,CKAP4,COL4A1,F2,FABP3,GABRD,HCAR3,NPY,NR3C2,P2RY1,PTGS2,SLC16A6,SLC1A2,SNAP25,THBS2,TUBB3	18
Cell-To-Cell Signaling and Interaction,Hematological System Development and Function,Immune Cell Trafficking	adhesion	Adhesion of immune cells	4.99e-05	0.00177		0.22	-0.237	ALOX15,ANXA1,APOE,C3,CCL17,CCL19,CCL22,CLEC10A,CXCL10,CXCL11,F2,IFNG,LBP,LIF,NPY,NTN1,OSM,PTGS2,THBS2,TNFRSF8,TREM2,TXN,VTN	23
Hematological System Development and Function,Immune Cell Trafficking,Inflammatory Response,Tissue Development	accumulation	Accumulation of neutrophils	4.99e-05	0.00177		0.168	-0.034	ANXA1,CXCL10,DSC1,EDIL3,IFNG,MMP7,PTX3,TNFSF10,XBP1	9
Connective Tissue Disorders,Metabolic Disease,Organismal Injury and Abnormalities,Skeletal and Muscular Disorders	metabolic bone disease	Metabolic bone disease	4.99e-05	0.00177				ADAMTS4,ALPL,COL1A1,COL1A2,DMP1,FGF23,FKBP14,SERPINF1,SERPINH1	9
Cancer	hyperplasia	Hyperplasia of exocrine gland	4.99e-05	0.00177		1.168	1.004	CCKAR,IFNG,MST1R,OSM,PTGS2,RORA,SDC1,TGFA,WDR77	9
Lipid Metabolism,Molecular Transport,Small Molecule Biochemistry	release	Release of prostaglandin	5.01e-05	0.00177	Increased	2.101	1.806	BCL6,C3,F2,IFNG,NAMPT,PTGS2,TGFA,TNFSF10	8
Immunological Disease,Inflammatory Disease,Inflammatory Response,Neurological Disease,Organismal Injury and Abnormalities	experimental autoimmune encephalomyelitis	Experimental autoimmune encephalomyelitis	5.09e-05	0.0018		-0.665	-0.78	BCL6,C3,C6,CCR4,CLEC4E,CXCL10,HLA-DQB1,HSPA5,IFNG,IL12RB2,IL18BP,IL27,IRF4,LIF,MOG,NPY,RORA,SDC1,TBX21,TGFA,TNFSF10,XBP1	22
Cellular Movement	cell movement	Cell movement of muscle cells	5.15e-05	0.0018		0.662	0.352	APOE,COL1A1,CXCL10,CXCL11,F2,HAS2,IFNG,MMP7,NAMPT,PTGS2,TBX21,TNFSF10,TXN,VCAN,VTN	15
Connective Tissue Disorders,Hereditary Disorder,Organismal Injury and Abnormalities	hereditary connective tissue disorder	Hereditary connective tissue disorder	5.15e-05	0.0018				ADAMTS4,ADAMTSL2,ALDH18A1,ALPL,APOE,CCL17,CDC6,CDT1,CNN1,COL1A1,COL1A2,COL4A1,DMP1,FGF23,FKBP14,FRZB,LAMB3,MASP1,MFAP4,MFSD2A,MYMK,ORC1,P4HB,PYCR1,SEC24D,SERPINF1,SERPINH1,SFRP2,THBS2,TREM2,VCAN,VNN1,ZIC2	33
Inflammatory Response	immune response	Immune response of cells	5.15e-05	0.0018	Increased	2.395	1.949	ABCB1,ALOX15,ANXA1,APOE,BAK1,BCL6,C3,CCL19,CCL22,CLEC6A,CXCL10,EIF2AK2,GZMB,HLA-DQB1,HSP90AA1,IFNG,NAMPT,NPY,NTN1,OSM,PGLYRP1,PTX3,RET,RORA,SLC1A5,SMAD7,SOCS3,SYT7,TBX21,TNFSF10,TREM2,VTN,XBP1	33
Cell Death and Survival	cell death	Cell death of lymphatic system cells	5.19e-05	0.00181		1.602	1.737	ACHE,APOE,BAK1,CCDC86,CCL19,CCNB1,CLEC10A,COL1A1,CXCL10,DRAM1,DUSP5,EIF2AK2,GP2,GZMA,GZMB,HSPA5,IFNG,IL27,IRF4,MOG,SMAD7,TBX21,THBS2,TNFSF10,TXN,XCL1	26
Cancer,Organismal Injury and Abnormalities	thoracic neoplasm	Thoracic neoplasm	5.31e-05	0.00185		-1.019	-1	ABCB1,ACHE,ADAMTS1,AICDA,AK2,ALOX15,ANXA1,ANXA2,APOD,APOE,BCL6,C1QBP,CCKAR,CCL17,CCL19,CCL22,CCNA2,CCNB1,CCNE1,CDC20,CDC6,CDH10,CKS2,CLDN3,COL4A1,CPAMD8,CPNE7,CTXN3,CUX2,CYP1A1,DSCAML1,E2F7,EPHX4,F2,FABP4,FAIM2,GABRD,GFRA3,GRIK4,HLA-DQB1,HR,HSP90AA1,HSPD1,IFNG,IL12RB2,IRF4,KANK4,KDELR3,KEL,KRT35,LAMB3,LGR6,MCHR1,MCM2,MEF2B,MMP7,MOV10L1,MST1R,MYBL1,MYBPH,NAMPT,NPY,NTRK3,NUPR1,OLFM4,ORC1,P4HB,PDK4,…	93
Cancer,Organismal Injury and Abnormalities	pelvic tumor	Pelvic tumor	5.38e-05	0.00187		0.97	1.025	ABCB1,ADAMTS4,ADAMTS5,AGBL3,AICDA,AK2,ALDH18A1,ALOX15,ALPK3,ALPL,ANK1,ANXA1,ANXA2,APOD,APOE,ART5,ASGR2,ATP2A1,BCL6,BHLHA15,BTNL9,C16orf45,C3,C6,CA8,CCKAR,CCNA2,CCNB1,CCNE1,CCR4,CCT5,CCT6A,CDC20,CDC25A,CDC25C,CDC6,CDH10,CDT1,CENPP,CKAP4,CLDN11,CLDN3,CLEC4A,CLEC4F,CNN1,CNTN1,COL1A1,COL1A2,COL4A1,COL4A6,CPAMD8,CPNE7,CTSL,CUX2,CXCL10,CXCL11,CYP1A1,DDO,DEPDC1B,DLGAP1,DLGAP3,DNER,DSC1,DSCAML1,DUSP26,DU…	228
Cancer,Organismal Injury and Abnormalities,Respiratory Disease	lung cancer	Lung cancer	5.4e-05	0.00187		-1.019	-1.003	ABCB1,ACHE,ADAMTS1,AICDA,AK2,ANXA1,ANXA2,APOD,APOE,BCL6,C1QBP,CCKAR,CCL17,CCL19,CCL22,CCNA2,CCNB1,CCNE1,CDC20,CDC6,CDH10,CKS2,CLDN3,COL4A1,CPAMD8,CPNE7,CTXN3,CUX2,CYP1A1,DSCAML1,E2F7,EPHX4,F2,FABP4,FAIM2,GABRD,GFRA3,GRIK4,HLA-DQB1,HR,HSP90AA1,HSPD1,IFNG,IL12RB2,KANK4,KDELR3,KEL,KRT35,LAMB3,LGR6,MCHR1,MCM2,MEF2B,MMP7,MOV10L1,MST1R,MYBL1,MYBPH,NAMPT,NPY,NTRK3,NUPR1,OLFM4,ORC1,P4HB,PDK4,PHB,PKHD1,PL…	90
Cancer,Cell-To-Cell Signaling and Interaction,Organismal Injury and Abnormalities	response	Response of cancer cells	5.43e-05	0.00187				ANXA1,GZMB,IFNG,TNFSF10	4
Cellular Function and Maintenance,Small Molecule Biochemistry	homeostasis	Homeostasis of ion	5.44e-05	0.00187		-0.069	-0.075	ADAMTS1,ANK1,APOE,BAK1,CCL19,CCL8,CXCL10,DMP1,FGF23,HSPA5,KEL,NR3C2,PKHD1,SLC40A1,SLC4A11,SYPL2,TF,TRPM8,XBP1	19
Cell Death and Survival,Organismal Injury and Abnormalities	apoptosis	Apoptosis of epithelial cell lines	5.52e-05	0.00189		-0.29	-0.451	ALOX15,BAK1,BCL6,DDN,EIF2AK2,F2,HK2,HSPA5,HSPD1,IFNG,PTGS2,SERPINF1,SRXN1,TGFA,TNFSF10,VTN,XBP1	17
Cellular Movement,Skeletal and Muscular System Development and Function	migration	Migration of muscle cells	5.54e-05	0.00189		1.023	0.703	APOE,COL1A1,CXCL11,F2,HAS2,IFNG,MMP7,NAMPT,PTGS2,TBX21,TNFSF10,TXN,VCAN,VTN	14
Endocrine System Disorders,Organismal Injury and Abnormalities,Reproductive System Disease	pituitary lesion	Pituitary lesion	5.54e-05	0.00189				ACHE,ANXA1,ANXA2,C3,CCNE1,FABP4,FRZB,IFNG,LAMB3,RNASE1,SFRP2,STX1A,TGFA,VTN	14
Cancer,Hematological Disease,Organismal Injury and Abnormalities	hematological neoplasia	Hematopoietic neoplasm	5.67e-05	0.00193		-0.336	-0.268	ABCB1,ACHE,ADAMTS5,AICDA,ALOX15,ALPK3,ALPL,ANKRD22,ANXA1,ANXA2,APOE,BAG2,BAK1,BCL6,BCL7A,BTNL9,C3,C6,CCDC86,CCL17,CCL19,CCL22,CCL8,CCNA2,CCNB1,CCR4,CDC20,CDC25A,CDH10,CDT1,CLEC4A,COL1A1,COL1A2,COL4A1,COL4A6,CTSL,CUX2,CXCL10,CXCL11,CYP1A1,DLGAP3,DNER,DSC1,DUSP5,E2F7,EIF2AK2,ENTPD2,F2,FRZB,GABRD,GFPT2,GRIK3,GRIK4,GZMB,HAPLN3,HCAR3,HK2,HLA-DQB1,HSP90AA1,HSPA12A,HSPA5,HSPA6,HSPD1,IFIT1,IFIT3,IFNG,IL1…	123
Protein Synthesis	production	Production of protein	5.86e-05	0.00198		1.499	1.423	ABCB1,AICDA,APOE,BCL6,CCR10,CCR4,CLEC4A,CLEC4E,CXCL10,HLA-DQB1,IFNG,IRF4,JCHAIN,MYBL1,PGLYRP1,POLQ,PTGS2,SDC1,TBX21,TNFSF10,WDR77	21
Cellular Movement,Hematological System Development and Function,Hematopoiesis	chemotaxis	Chemotaxis of hematopoietic progenitor cells	5.86e-05	0.00198		0.305	0.037	CCL19,CCL22,CCL8,CCR4,CXCL10	5
Cell-To-Cell Signaling and Interaction,Hematological System Development and Function	binding	Binding of T lymphocytes	5.98e-05	0.00201		0.07	-0.275	ANXA1,CCL17,CCL19,CCL22,CLEC10A,CXCL10,CXCL11,F2,IFNG,NPY,NTN1,THBS2	12
Cancer,Organismal Injury and Abnormalities,Tumor Morphology	progression	Progression of tumor	6.06e-05	0.00203		0.243	0.121	ABCB1,ADAMTS1,ANXA1,ANXA2,APOE,CCL19,CCNE1,CLDN1,CLDN3,COL1A1,COL1A2,GZMB,HSP90AA1,MMP7,MST1R,NTRK3,PTGS2,RET,SERPINF1,TNFSF10,TUBB3	21
Dermatological Diseases and Conditions,Hematological Disease,Immunological Disease,Organismal Injury and Abnormalities	lymphoproliferative disorder of the skin	Lymphoproliferative disorder of the skin	6.06e-05	0.00203				ANXA1,BAK1,BCL6,CCL8,CCR4,CXCL10,CXCL11,DUSP5,IRF4,OAS1,OAS2,TNFRSF8,TUBB3	13
Cell-To-Cell Signaling and Interaction,Skeletal and Muscular System Development and Function	binding	Binding of smooth muscle cells	6.08e-05	0.00203		0.896	0.679	ALOX15,CKAP4,F2,IFNG,NPY,VTN	6
Cardiovascular System Development and Function,Tissue Morphology	permeability	Permeability of vascular system	6.13e-05	0.00204		-0.058	-0.18	ALOX15,ANXA1,APOE,C3,F2,IFNG,IL18BP,MOG,P2RY1,PTGS2,PTX3,RNASE1,SERPINF1,TNFSF10	14
Cancer,Organismal Injury and Abnormalities,Skeletal and Muscular Disorders	smooth muscle tumor	Smooth muscle tumor	6.27e-05	0.00208				ACHE,AK2,CKS2,CLDN11,CTSL,FMOD,IFIT1,IFIT3,MST1R,MYBL1,NR3C2,PDK4,PTGS2,RET,RORA,S100A11,SCG2,SOCS3,TPBG,TUBB3,VCAN	21
Cell-To-Cell Signaling and Interaction,Cellular Movement,Hematological System Development and Function,Immune Cell Trafficking	recruitment	Recruitment of mononuclear leukocytes	6.34e-05	0.0021		1.318	0.929	ANXA1,APOE,CCL17,CCL19,CCL22,CCR4,CLEC4E,CXCL10,CXCL11,IFNG,OSM,TNFRSF8	12
Cellular Assembly and Organization,Cellular Compromise	retraction	Retraction of plasma membrane projections	6.43e-05	0.00213				F2,MOG,NTN1	3
Cell Death and Survival,Organismal Injury and Abnormalities	cell death	Cell death of epithelial cell lines	6.46e-05	0.00213		-0.295	-0.497	ALOX15,BAK1,BCL6,DDN,EIF2AK2,F2,HK2,HSPA5,HSPD1,IFNG,NAMPT,NTRK3,PTGS2,SERPINF1,SRXN1,TGFA,TNFSF10,VTN,XBP1,ZBP1	20
Organismal Injury and Abnormalities	sclerotic lesion	Sclerotic lesion	6.51e-05	0.00214		0.142	0.108	ALOX15,APOE,CXCL10,FABP4,GZMB,IFNG,NR3C2,PTX3,RET,SOCS3,TNFSF10,TREM2,TUBB3,VCAN,VNN1	15
Drug Metabolism,Lipid Metabolism,Molecular Transport,Small Molecule Biochemistry	release	Release of prostaglandin E2	6.56e-05	0.00215	Increased	2.591	2.315	BCL6,C3,IFNG,NAMPT,PTGS2,TGFA,TNFSF10	7
Dermatological Diseases and Conditions,Immunological Disease,Organismal Injury and Abnormalities	pemphigus	Pemphigus	6.65e-05	0.00217				ANXA1,CXCL11,DUSP5,EIF2AK2,IFIT1,IFIT3,OAS1,OAS2,PTGS2,SCG2,TNFSF10	11
Infectious Diseases	tuberculosis	Tuberculosis	6.65e-05	0.00217				ANXA1,CCL8,CXCL10,IFIT1,IFIT3,IFIT5,IFNG,OAS1,OAS2,OLFM4,PTGS2	11
Cellular Movement,Skeletal and Muscular System Development and Function	migration	Migration of smooth muscle cells	6.76e-05	0.00219		1.464	1.162	APOE,COL1A1,CXCL11,F2,HAS2,IFNG,NAMPT,PTGS2,TBX21,TNFSF10,TXN,VCAN,VTN	13
Cellular Growth and Proliferation	inhibition	Inhibition of cells	7.13e-05	0.00231		1.628	1.222	ANXA1,C1QBP,CXCL10,GZMA,HK2,IFNG,IL27,NPY,OSM,PTGS2,SDC1,TBX21,TNFSF10	13
Cardiovascular System Development and Function,Cell-To-Cell Signaling and Interaction	binding	Binding of endothelial cells	7.14e-05	0.00231		0.239	0.008	ALOX15,ANXA2,C1QBP,C3,CXCL11,EDIL3,F2,HAS2,HSPA5,IFNG,NPY,SLC7A5,TRPM8,TXN,VTN	15
Cellular Movement,Hematological System Development and Function,Immune Cell Trafficking,Inflammatory Response	chemotaxis	Chemotaxis of phagocytes	7.17e-05	0.00231		1.28	0.733	ANXA1,APOE,C1QBP,C3,CCL17,CCL19,CCL22,CCL8,CXCL10,CXCL11,F2,IFNG,LBP,MMP7,SCG2,SLAMF8,THBS2,VIPR1,VTN,XCL1	20
Cancer,Organismal Injury and Abnormalities,Reproductive System Disease	uterine tumor	Uterine tumor	7.24e-05	0.00233				ABCB1,ADAMTS5,AK2,ALPK3,ANK1,ANXA1,ANXA2,APOD,ASGR2,ATP2A1,BCL6,BHLHA15,C16orf45,C3,C6,CA8,CCKAR,CCNA2,CCNB1,CCNE1,CCT5,CDC20,CDC25A,CDC6,CDH10,CLDN11,CLDN3,CLEC4F,CNN1,CNTN1,COL4A6,CPAMD8,CTSL,CUX2,CXCL10,CYP1A1,DEPDC1B,DLGAP1,DNER,DUSP26,E2F7,EDEM3,EIF2AK2,ELL2,EMILIN1,EPHX4,FABP4,FAM72A,FMOD,FRZB,GAL3ST4,GP2,GPR75,GRIK4,GZMA,HAS2,HEPACAM,HERC5,HSP90AA1,HSPD1,HSPH1,IFIT1,IFIT3,IFNG,INSRR,IQSEC3…	128
Cancer,Organismal Injury and Abnormalities,Respiratory Disease	lung adenocarcinoma	Lung adenocarcinoma	7.26e-05	0.00233				BCL6,C1QBP,CCKAR,CCNA2,CCNB1,CCNE1,CDC20,CDC6,CDH10,CKS2,CLDN3,COL4A1,CPNE7,CTXN3,CUX2,DSCAML1,E2F7,EPHX4,FABP4,FAIM2,GFRA3,GRIK4,HR,HSP90AA1,HSPD1,IFNG,IL12RB2,KANK4,KEL,LGR6,MCM2,MOV10L1,MST1R,MYBL1,NAMPT,NPY,NTRK3,OLFM4,ORC1,P4HB,PDK4,PKHD1,PLA2G4F,POLQ,PPA1,PTGS2,PTPRH,RET,SCG2,SKA3,SLC6A15,SRGAP3,TK1,TUBB3,UBA7,WDR77,ZIC2	57
Cancer,Gastrointestinal Disease,Organismal Injury and Abnormalities	development	Development of digestive organ tumor	7.37e-05	0.00235		-0.579	-0.387	ABCB1,ADAMTS1,ADAMTS4,AICDA,ALOX15,ALPK3,ALPL,ANK1,ANKRD22,ANXA1,APOD,APOE,ART5,ATP2A1,BAK1,BATF2,BCL6,BHLHA15,BPIFB3,C1QBP,C1QTNF6,C3,C6,CCKAR,CCNA2,CCNE1,CCR10,CCR4,CDC25C,CDC6,CDH10,CHST1,CKAP4,CNTN1,COL1A1,COL1A2,COL4A6,CPAMD8,CUX2,DDO,DEPDC1B,DLGAP1,DLGAP3,DPEP2,DRAM1,DSCAML1,DUSP5,E2F7,EDEM3,EDIL3,EIF2AK2,ELFN2,EMILIN1,ENTPD2,EPHX4,F2,FABP4,FAM155A,FAM209B,FBP2,FGF23,FNDC4,FRZB,GABRD,GFRA2,…	178
Cancer,Organismal Injury and Abnormalities,Reproductive System Disease	genital tumor	Genital tumor	7.43e-05	0.00236		0.97	1.027	ABCB1,ACHE,ADAMTS4,ADAMTS5,AGBL3,AK2,ALDH18A1,ALOX15,ALPK3,ALPL,ANK1,ANXA1,ANXA2,APOD,APOE,ASGR2,ATP2A1,BCL6,BHLHA15,BTNL9,C16orf45,C3,C6,CA8,CCKAR,CCNA2,CCNB1,CCNE1,CCR4,CCT5,CCT6A,CDC20,CDC25A,CDC25C,CDC6,CDH10,CENPP,CKAP4,CLDN11,CLDN3,CLEC4A,CLEC4F,CNN1,CNTN1,COL1A1,COL1A2,COL4A1,COL4A6,CPAMD8,CPNE7,CTSL,CUX2,CXCL10,CXCL11,CYP1A1,DDO,DEPDC1B,DLGAP1,DLGAP3,DNER,DSCAML1,DUSP26,DUSP5,E2F7,EDEM3,E…	215
Connective Tissue Disorders,Organismal Injury and Abnormalities	damage	Damage of connective tissue	7.44e-05	0.00236	Increased	2.36	2.235	ADAMTS4,ADAMTS5,APOE,F2,IFNG,NAMPT,OSM,PTGS2,TGFA,VCAN	10
Cancer,Endocrine System Disorders,Gastrointestinal Disease,Organismal Injury and Abnormalities	pancreatic cancer	Pancreatic cancer	7.55e-05	0.00239				ADAMTS1,ADAMTS5,AICDA,ALPL,ANK1,ANXA1,BPIFB3,C1QBP,CCL22,CCR10,CDH10,CELA1,CMPK2,CNTN1,COL1A1,COL1A2,COL4A1,COL4A6,CPNE7,CTHRC1,CXCL10,DLGAP1,DLGAP3,DMP1,DNER,DSCAML1,EDIL3,EIF2AK2,ELL2,F2,FANCI,FIBIN,FKBP14,FMOD,GABRD,GP2,GRID1,GRIK3,GZMB,HAPLN3,HERC5,HS3ST3A1,HSP90AA1,IL18BP,INSRR,KANK4,KCNN1,KDELR3,KIRREL3,LRFN1,LRRC4,MAML3,MANF,MASP1,MISP,MMP7,MOV10L1,MOXD1,MYO5B,NMUR1,NTRK3,P2RY1,PDK4,PKHD1,…	94
Cell-To-Cell Signaling and Interaction,Cellular Growth and Proliferation	induction	Induction of cells	7.57e-05	0.00239		1.839	1.312	CCNA2,CLEC4E,F2,IFNG,IL27,LIF,OSM,PTGS2,SLC1A5,STEAP1,TNFSF10	11
Cell Cycle	S phase	Re-entry into S phase of tumor cell lines	7.72e-05	0.00243		1.977	1.685	CCNE1,CDC25A,TF,TGFA	4
Carbohydrate Metabolism,Lipid Metabolism,Molecular Transport,Small Molecule Biochemistry	transport	Transport of choline-phospholipid	7.72e-05	0.00243				ABCB1,APOE,IFNG,MFSD2A	4
Inflammatory Response,Neurological Disease	inflammation	Inflammation of central nervous system	7.97e-05	0.0025		-1.061	-1.133	ANXA1,BCL6,C3,C6,CCR4,CLEC4E,CXCL10,HLA-DQB1,HSPA5,IFNG,IL12RB2,IL18BP,IL27,IRF4,LIF,MOG,NPY,PTGS2,RORA,SDC1,TBX21,TGFA,TNFSF10,TREM2,XBP1	25
Infectious Diseases	infection	Parasitic Infection	8.24e-05	0.00258		-1.643	-1.343	ANXA1,APOE,C3,EIF2AK2,GZMA,HLA-DQB1,IFNG,IL27,JCHAIN,NTRK3,PTGS2,SDC1,SOCS3,TBX21	14
Cancer,Organismal Injury and Abnormalities,Reproductive System Disease	carcinoma	Breast carcinoma	8.45e-05	0.00263				ADAMTS1,ADAMTS4,ADAMTS5,AICDA,ANXA1,APOD,ART5,ATP2A1,BAK1,BCL6,C1QBP,C3,CCL17,CCNB1,CCR4,CDC25A,CDC6,CDH10,CKAP4,CLDN1,CLEC10A,CNN1,CNTN1,COL1A2,CTXN3,CXCL10,DCTPP1,E2F7,ENTPD2,ERCC6L,FABP4,FNDC4,GABRD,GFPT2,GRID1,HAPLN3,HERC5,HK2,HSP90AA1,HSPD1,IFIT1,LMAN1,MCM10,MCM2,MST1R,MYO5B,NTRK3,P2RY1,P4HB,PDK4,PKHD1,POLQ,PPA1,PROCA1,PRSS42P,PTGS2,PYCR1,RET,RHEX,SDC1,SEMA3C,SERPINF1,SKA3,SLC16A1,SLC40A1,SL…	72
Tissue Development	organization	Organization of extracellular matrix	8.54e-05	0.00266				ADAMTS4,ADAMTS5,ADAMTSL2,COL1A1,COL1A2,COL4A1,COL4A6,CTSL,DMP1,EMILIN1,FMOD,LAMB3,MMP7,PTX3,VCAN,VTN	16
Cell-To-Cell Signaling and Interaction,Cellular Movement,Hematological System Development and Function,Immune Cell Trafficking	recruitment	Recruitment of lymphocytes	8.59e-05	0.00266		0.792	0.445	CCL17,CCL19,CCL22,CCR4,CLEC4E,CXCL10,CXCL11,IFNG,OSM,TNFRSF8	10
Cell Morphology,Cellular Function and Maintenance	permeability	Permeability of cells	8.59e-05	0.00266		-0.761	-0.903	ANXA1,AQP3,CLDN1,COL4A1,F2,IFNG,P2RY1,PHB,RNASE1,SERPINF1,TGFA	11
Cell-To-Cell Signaling and Interaction,Inflammatory Response	immune response	Immune response of phagocytes	8.91e-05	0.00275		1.307	0.951	ALOX15,ANXA1,C3,CCL19,CCL22,CLEC6A,CXCL10,IFNG,NTN1,OSM,PGLYRP1,PTX3,RORA,TREM2,VTN,XBP1	16
Cancer,Organismal Injury and Abnormalities,Respiratory Disease	lung tumor	Lung tumor	9.15e-05	0.00281		-1.019	-0.998	ABCB1,ACHE,ADAMTS1,AICDA,AK2,ALOX15,ANXA1,ANXA2,APOD,APOE,BCL6,C1QBP,CCKAR,CCL17,CCL19,CCL22,CCNA2,CCNB1,CCNE1,CDC20,CDC6,CDH10,CKS2,CLDN3,COL4A1,CPAMD8,CPNE7,CTXN3,CUX2,CYP1A1,DSCAML1,E2F7,EPHX4,F2,FABP4,FAIM2,GABRD,GFRA3,GRIK4,HLA-DQB1,HR,HSP90AA1,HSPD1,IFNG,IL12RB2,KANK4,KDELR3,KEL,KRT35,LAMB3,LGR6,MCHR1,MCM2,MEF2B,MMP7,MOV10L1,MST1R,MYBL1,MYBPH,NAMPT,NPY,NTRK3,NUPR1,OLFM4,ORC1,P4HB,PDK4,PHB,P…	91
Immunological Disease	delayed hypersensitive reaction	Delayed hypersensitive reaction	9.15e-05	0.00281		-1.706	-1.958	ANXA1,APOE,CLEC4E,CXCL10,EIF2AK2,IFNG,IL27,MOG,MST1R,SDC1,TNFSF10	11
Dermatological Diseases and Conditions,Inflammatory Disease,Organismal Injury and Abnormalities,Skeletal and Muscular Disorders	juvenile dermatomyositis	Juvenile dermatomyositis	9.34e-05	0.00285				COL1A1,COL1A2,COL4A1,EMILIN1,S100A11,SDC3,SERPINH1	7
Hematological System Development and Function,Organismal Functions	coagulation	Coagulation of blood	9.36e-05	0.00285		-1.079	-1.224	ABCB1,ANXA2,APOE,ASGR2,C1QBP,C3,CCL17,CCL22,COL1A1,COL1A2,ENTPD2,F2,LMAN1,P2RY1,PTGS2,SERPINF1,THBS2,VCAN,VTN	19
Cell Signaling,Small Molecule Biochemistry	synthesis	Synthesis of nitric oxide	9.36e-05	0.00285		1.661	1.414	APOE,BCL6,F2,HSP90AA1,HSPD1,IFNG,IL12RB2,LIF,MOG,NPY,NTN1,PTGS2,PTX3,RORA,SNTA1,SOCS3,SPR,TNFSF10,ZDHHC21	19
Endocrine System Disorders,Gastrointestinal Disease,Organismal Injury and Abnormalities	pancreatic mass	Pancreatic mass	9.45e-05	0.00287				ADAMTS1,ADAMTS5,AICDA,ALPL,ANK1,ANXA1,BHLHA15,BPIFB3,C1QBP,CCKAR,CCL22,CCR10,CDH10,CELA1,CMPK2,CNTN1,COL1A1,COL1A2,COL4A1,COL4A6,CPNE7,CTHRC1,CXCL10,DLGAP1,DLGAP3,DMP1,DNER,DSCAML1,EDIL3,EIF2AK2,ELL2,F2,FAM155A,FANCI,FIBIN,FKBP14,FMOD,GABRD,GP2,GRID1,GRIK3,GZMB,HAPLN3,HERC5,HS3ST3A1,HSD17B13,HSP90AA1,IL18BP,INSRR,IQSEC3,KANK4,KCNN1,KDELR3,KIRREL3,LRFN1,LRRC4,MAML3,MANF,MASP1,MISP,MMP7,MOV10L1,MOX…	105
Cell Cycle,Reproductive System Development and Function	meiosis I	Meiosis I of germ cells	9.56e-05	0.0029				CDC20,CKS2,MOV10L1,MYBL1,TDRD9,TRIP13	6
Cell Death and Survival	cell death	Cell death of blood cells	9.62e-05	0.00291	Increased	3.556	3.481	ABCB1,AICDA,ANXA1,APOE,BAK1,BCL6,C3,CCDC86,CCL19,CCNB1,CLEC10A,COL1A1,CXCL10,DRAM1,DUSP5,EIF2AK2,F2,FABP4,GP2,GZMA,GZMB,HSPA5,IFNG,IL27,IRF4,MOG,NAMPT,OSM,SERPINF1,SMAD7,TBX21,THBS2,TNFRSF8,TNFSF10,TREM2,XBP1,XCL1	37
Connective Tissue Disorders,Immunological Disease,Inflammatory Disease,Organismal Injury and Abnormalities,Skeletal and Muscular Disorders	systemic lupus erythematosus	Systemic lupus erythematosus	9.75e-05	0.00294				ABCB1,ANXA1,APOE,BAK1,CXCL10,CXCL11,DUSP5,EIF2AK2,GZMA,GZMB,HCAR3,HERC5,HLA-DQB1,IFIT1,IFIT3,IFNG,OAS1,OAS2,PTGS2,SCG2,TNFSF10,XBP1,ZBP1	23
Cancer,Gastrointestinal Disease,Organismal Injury and Abnormalities	pancreatobiliary tumor	Pancreatobiliary tumor	0.0001	0.00302		0.218	0.192	ADAMTS1,ADAMTS5,AICDA,ALPL,ANK1,ANXA1,ANXA2,BHLHA15,BPIFB3,C1QBP,CCKAR,CCL22,CCNE1,CCR10,CDH10,CELA1,CMPK2,CNN1,CNTN1,COL1A1,COL1A2,COL4A1,COL4A6,CPNE7,CTHRC1,CXCL10,CYP1A1,DLGAP1,DLGAP3,DMP1,DNER,DSC1,DSCAML1,EDIL3,EIF2AK2,ELL2,F2,FAM155A,FANCI,FIBIN,FKBP14,FMOD,GABRD,GP2,GRID1,GRIK3,GZMB,HAPLN3,HERC5,HS3ST3A1,HSD17B13,HSP90AA1,IL18BP,INSRR,IQSEC3,KANK4,KCNN1,KDELR3,KIAA1522,KIRREL3,LMAN1,LRFN1,…	116
Cell-To-Cell Signaling and Interaction,Hematological System Development and Function,Immune Cell Trafficking	adhesion	Adhesion of lymphocytes	0.000104	0.00311		0.565	0.171	ANXA1,CCL17,CCL19,CCL22,CXCL11,F2,IFNG,LIF,NTN1,OSM,THBS2	11
Humoral Immune Response,Protein Synthesis	quantity	Quantity of immunoglobulin	0.000104	0.00311		1.172	1.16	ABCB1,AICDA,APOE,BCL6,CCR10,CCR4,CLEC4A,CLEC4E,CXCL10,HLA-DQB1,IFNG,IRF4,JCHAIN,MYBL1,POLQ,PTGS2,SDC1,TBX21,TNFSF10	19
Gastrointestinal Disease,Inflammatory Disease,Inflammatory Response,Organismal Injury and Abnormalities	ulcerative colitis	Ulcerative colitis	0.000109	0.00327		1.067	1.251	ABCB1,ANXA1,COL1A1,COL1A2,CXCL10,GABRD,IFNG,PTGS2,RET,SMAD7,SOCS3,STRA6,TF,TRAM2,UBA7,XBP1	16
Cardiovascular Disease,Organismal Injury and Abnormalities	peripheral vascular disease	Peripheral vascular disease	0.00011	0.00327		0.152	0.186	ACHE,APOE,BCL6,CEMIP,CKAP4,CLEC4A,COL1A1,COL1A2,COL4A1,CYP1A1,F2,FABP3,GABRD,HCAR3,HEBP2,HSPH1,NPY,NR3C2,P2RY1,PTGS2,SLC16A6,SLC1A2,SNAP25,SNTA1,STIP1,THBS2,TUBB3	27
Cell Cycle	G2 phase	G2 phase of cervical cancer cell lines	0.00011	0.00327				ANXA2,CCNA2,CCNB1,CDC25A,CDC25C,TCP1	6
Cell Death and Survival	apoptosis	Apoptosis of lymphoblastoid cell lines	0.00011	0.00327		1.187	1.012	CCNE1,GZMB,IFNG,IRF4,LARP1B,TNFSF10	6
Cell Morphology,Nervous System Development and Function,Neurological Disease,Tissue Morphology	abnormal morphology	Abnormal morphology of neurons	0.000111	0.00327				ADAMTS4,APOE,C3,CCKAR,CCR10,CNTN1,F2,FST,GFRA2,HSPD1,IFNG,KEL,LHX8,MOG,NTRK3,PAK5,PVALB,RET,SLC1A2,SLC6A15,SNTA1,SPR,SRGAP3,STIP1,STX1A,SYN1,TGFA,UNC13A,VCAN	29
Cell-To-Cell Signaling and Interaction,Hematological System Development and Function	response	T cell response	0.000114	0.00335	Increased	2.321	2.123	CCL19,CXCL11,GZMB,HLA-DQB1,IFNG,IL12RB2,IL27,LIF,MOG,NAMPT,RET,SOCS3,TBX21	13
Cell-To-Cell Signaling and Interaction,Hematological System Development and Function	response	Response of lymphocytes	0.000116	0.00342	Increased	2.157	1.922	CCL19,CXCL11,GZMB,HLA-DQB1,IFNG,IL12RB2,IL27,LIF,MOG,NAMPT,RET,SLC1A5,SOCS3,TBX21,VTN	15
Cardiovascular System Development and Function,Ophthalmic Disease,Organismal Development,Organismal Injury and Abnormalities,Visual System Development and Function	neovascularization	Neovascularization of choroid	0.000117	0.00342		1.067	0.951	APOE,C3,C6,IFNG,LIF,MMP7,PTGS2	7
Cellular Development,Cellular Growth and Proliferation	proliferation	Proliferation of blood cells	0.000117	0.00342		-0.048	-0.355	ABCB1,ACHE,ANXA1,APOE,BCL6,BTNL9,C1QBP,C3,CCL17,CCL19,CCL22,CCNA2,CDC25A,CLEC10A,CLEC4A,CXCL10,DUSP5,EIF2AK2,F2,FABP4,GP2,HLA-DQB1,HR,HSPA5,HSPD1,IFNG,IL12RB2,IL27,IRF4,LIF,MOG,MYBL1,NPY,OSM,PTGS2,SDC1,SFRP2,SMAD7,SOCS3,TBX21,TNFSF10,TXN,XCL1,ZBTB32	44
Connective Tissue Disorders,Inflammatory Disease,Organismal Injury and Abnormalities,Skeletal and Muscular Disorders	rheumatic disease	Rheumatic disease of joint	0.000119	0.00346				BCL6,FRZB,HSPD1,IFNG,NPY,PTGS2,SLC1A2,SNAP25,SOCS3,TF,TNFSF10,TUBB3	12
Cellular Assembly and Organization,Cellular Function and Maintenance	organization	Organization of cytoskeleton	0.000124	0.00362		1.67	1.076	ACHE,ADAMTS4,ALOX15,ANXA1,APOE,BCL6,C16orf45,C1QBP,C3,CCKAR,CCL19,CCNA2,CCNB1,CDC20,CDC6,CDH10,CKAP4,CNTN1,COL1A1,CUX2,CXCL10,DNER,F2,FKBP4,GFRA2,GZMB,HAS2,HSP90AA1,IFNG,INSRR,KIRREL3,LIF,LRRC4,MMP7,MOG,MST1R,MYBPH,MYH7B,MYO5B,NPHS1,NPY,NTMT1,NTN1,NTRK3,OSM,PAK5,PKHD1,PTGS2,PVALB,REM1,RET,RIMS3,S100A11,SDC3,SERPINF1,SRGAP3,STIP1,STMN2,SYN1,TF,TNFSF10,TPBG,TREM2,TUBB3,VTN	65
Cancer,Organismal Injury and Abnormalities	invasion	Invasion of tissue	0.000126	0.00363		0.843	0.629	CLDN11,F2,FMOD,FST,HAS2,IFNG,MMP7,OSM,RET,RORA,SLC16A1,SOCS3,THBS2,TNFSF10	14
Cell-To-Cell Signaling and Interaction,Cellular Movement,Hematological System Development and Function,Immune Cell Trafficking,Inflammatory Response	chemoattraction	Chemoattraction of phagocytes	0.000127	0.00363		1.598	1.155	ANXA1,C3,CCL19,CCL22,CXCL10,XCL1	6
Cell-mediated Immune Response,Cellular Development,Cellular Function and Maintenance,Cellular Growth and Proliferation,Embryonic Development,Hematological System Development and Function,Hematopoiesis,Lymphoid Tissue Structure and Development,Organ Development,Organismal Development,Tissue Development	development	Development of Th17 cells	0.000127	0.00363		-0.849	-1.019	BCL6,IFNG,IL27,RORA,SOCS3,TBX21	6
Cell Signaling,Molecular Transport,Small Molecule Biochemistry,Vitamin and Mineral Metabolism	release	Release of Ca2+	0.000127	0.00363		1.712	1.367	ANXA1,BAK1,C3,CCKAR,CCL17,CCL19,F2,FAIM2,LIF,OSM,P2RY1,S100A11,TRPM8,XCL1,ZDHHC21	15
Cellular Growth and Proliferation,Hematological System Development and Function	inhibition	Inhibition of Th17 cells	0.000127	0.00363				IFNG,IL27,PTGS2	3
Cell Morphology,Cellular Function and Maintenance,Organismal Injury and Abnormalities,Tissue Morphology	permeability	Permeability of epithelial cells	0.000127	0.00363				CLDN1,F2,SERPINF1	3
Lipid Metabolism,Molecular Transport,Small Molecule Biochemistry	transport	Transport of sphingomyelin	0.000127	0.00363				ABCB1,IFNG,OSM	3
Cell-To-Cell Signaling and Interaction,Cellular Assembly and Organization	formation	Formation of cell-cell contacts	0.000128	0.00364		0.096	-0.238	ACHE,CLDN1,CLDN11,CLDN3,CNTN1,COL4A1,CUX2,DLGAP3,F2,KIRREL3,LRRC4,NTN1,NTRK3,PKHD1,SNTA1,SYN1,THBS2,TPBG,UNC13A	19
Cell Death and Survival	cell death	Cell death of immune cells	0.000129	0.00366	Increased	3.605	3.474	AICDA,ANXA1,APOE,BAK1,BCL6,C3,CCDC86,CCL19,CCNB1,CLEC10A,COL1A1,CXCL10,DRAM1,DUSP5,EIF2AK2,F2,FABP4,GP2,GZMA,GZMB,HSPA5,IFNG,IL27,IRF4,MOG,NAMPT,SERPINF1,SMAD7,TBX21,THBS2,TNFRSF8,TNFSF10,TREM2,XBP1,XCL1	35
Cancer,Gastrointestinal Disease,Hepatic System Disease,Organismal Injury and Abnormalities	cancer	Liver cancer	0.000129	0.00367		1.116	1.192	ADAMTS1,ADAMTS4,ADAMTS5,AICDA,AK2,ALPL,ANK1,ANXA1,ANXA2,APOE,B3GNT7,BAG2,BCL6,BTNL9,C3,CCL19,CCNA2,CCNB1,CCNE1,CCR10,CCT6A,CDC20,CDC6,CDH10,CENPP,CKS2,CLEC4A,CNN1,CNTN1,COL1A1,COL1A2,COL4A1,COL4A6,CPAMD8,CTHRC1,CUX2,CXCL10,DCTPP1,DDO,DLGAP1,DLGAP3,DMP1,DPEP2,DSCAML1,E2F7,EDIL3,EIF2AK2,ELL2,ELL3,F2,FAM131B,FAM155A,FAM170B,FANCI,FBP2,GABRD,GPC2,GPR75,GRIK3,GRIK4,GZMB,HEPACAM,HK2,HPCAL4,HR,HSP90AA1,…	159
Cell Morphology	polarization	Polarization of antigen presenting cells	0.00013	0.00367		1.709	1.435	APOE,IFNG,NAMPT,NPY,SOCS3,TXN,ZBP1	7
Developmental Disorder,Hereditary Disorder,Organismal Injury and Abnormalities,Skeletal and Muscular Disorders	autosomal dominant Emery-Dreifuss muscular dystrophy	Autosomal dominant Emery-Dreifuss muscular dystrophy	0.00013	0.00367				COL1A1,COL1A2,COL4A1,EMILIN1,S100A11,SDC3,SERPINH1	7
Cellular Movement	chemotaxis	Chemotaxis of myeloid cells	0.000137	0.00385		1.599	1.097	ANXA1,APOE,C1QBP,C3,CCL17,CCL19,CCL22,CCL8,CXCL10,F2,IFNG,LBP,MMP7,SCG2,SLAMF8,THBS2,VIPR1,VTN,XCL1	19
Cancer,Organismal Injury and Abnormalities	cancer	Cancer of cells	0.000138	0.00386		-0.624	-0.676	ABCB1,ACHE,ADAMTS1,AICDA,AK2,ANXA1,ANXA2,APOD,ART5,ATP2A1,BAG2,BAK1,BCL6,BCL7A,C16orf45,C3,C6,CCDC86,CCL17,CCL19,CCL22,CCL8,CCNA2,CCNB1,CCNE1,CCR4,CDC20,CDC25A,CDC6,CDH10,CELA1,CLEC4F,CLEC6A,CMPK2,CNN1,CNTN1,COL1A1,COL1A2,COL4A1,CPAMD8,CPNE7,CTHRC1,CTSL,CXCL10,CXCL11,CYP1A1,DLGAP1,DLGAP3,DNER,DPEP2,DSCAML1,DUSP5,E2F7,EDIL3,EMILIN1,ENTPD2,F2,FABP4,FAM155A,FRZB,FST,GABRD,GP2,GPC2,GRID1,GRIK3,GZMB,H…	158
Cell-To-Cell Signaling and Interaction,Cellular Movement,Hematological System Development and Function,Immune Cell Trafficking,Inflammatory Response	recruitment	Recruitment of neutrophils	0.000138	0.00386		0.043	-0.233	ALOX15,ANXA1,APOE,CCL19,CCL22,CLEC10A,CLEC4E,CXCL10,CYP1A1,EDIL3,IFNG,LIF,NTN1,PTX3	14
Cancer,Gastrointestinal Disease,Hepatic System Disease,Organismal Injury and Abnormalities	liver carcinoma	Liver carcinoma	0.000138	0.00386		0.876	0.99	ADAMTS1,ADAMTS4,ADAMTS5,AICDA,AK2,ANK1,ANXA1,ANXA2,APOE,B3GNT7,BAG2,BTNL9,C3,CCL19,CCNA2,CCNB1,CCNE1,CCR10,CCT6A,CDC20,CDC6,CDH10,CENPP,CKS2,CLEC4A,CNN1,CNTN1,COL1A1,COL1A2,COL4A1,COL4A6,CPAMD8,CTHRC1,CUX2,CXCL10,DCTPP1,DDO,DLGAP1,DLGAP3,DMP1,DPEP2,DSCAML1,E2F7,EDIL3,EIF2AK2,ELL2,ELL3,F2,FAM131B,FAM155A,FAM170B,FANCI,FBP2,GABRD,GPC2,GPR75,GRIK3,GRIK4,GZMB,HEPACAM,HK2,HPCAL4,HR,HSP90AA1,HSPA5,HSPA…	154
Gastrointestinal Disease,Immunological Disease,Ophthalmic Disease,Organismal Injury and Abnormalities	Sjï¿½gren syndrome	SjÃ¶gren syndrome	0.000138	0.00386				C3,CCL19,CCL22,CXCL10,IFIT3,LIF,OSM,SOCS3,TNFSF10,XCL1	10
Lipid Metabolism,Molecular Transport,Small Molecule Biochemistry	uptake	Uptake of lipid	0.000138	0.00386		1.392	1.011	ABCB1,APOD,APOE,C3,CCKAR,CISD1,FABP3,FABP4,SLC16A1,SLC27A2,STRA6,STX1A,TNFSF10	13
Cell-To-Cell Signaling and Interaction,Cellular Assembly and Organization,Cellular Function and Maintenance	assembly	Assembly of intercellular junctions	0.00014	0.0039		0.096	-0.25	ACHE,CLDN1,CLDN11,CLDN3,CNTN1,COL4A1,CUX2,DLGAP3,F2,KIRREL3,LRRC4,NTN1,NTRK3,SNTA1,SYN1,THBS2,TPBG,UNC13A	18
Cell-mediated Immune Response,Cellular Movement,Hematological System Development and Function,Immune Cell Trafficking,Inflammatory Response,Lymphoid Tissue Structure and Development	chemotaxis	Chemotaxis of helper T lymphocytes	0.000143	0.00395				CCL17,CCL22,CCR4,CXCL10	4
Hematological System Development and Function,Immune Cell Trafficking,Inflammatory Response,Tissue Development	accumulation	Accumulation of CD8+ T lymphocyte	0.000143	0.00395		-1.131	-1.272	CLEC4A,IFNG,SMAD7,TNFSF10	4
Amino Acid Metabolism,Small Molecule Biochemistry	incorporation	Incorporation of leucine	0.000143	0.00395		-0.577	-0.791	F2,MOV10L1,NR3C2,TGFA	4
Cancer,Endocrine System Disorders,Gastrointestinal Disease,Organismal Injury and Abnormalities	pancreatic tumor	Pancreatic tumor	0.000145	0.00398				ADAMTS1,ADAMTS5,AICDA,ALPL,ANK1,ANXA1,BHLHA15,BPIFB3,C1QBP,CCKAR,CCL22,CCR10,CDH10,CELA1,CMPK2,CNTN1,COL1A1,COL1A2,COL4A1,COL4A6,CPNE7,CTHRC1,CXCL10,DLGAP1,DLGAP3,DMP1,DNER,DSCAML1,EDIL3,EIF2AK2,ELL2,F2,FAM155A,FANCI,FIBIN,FKBP14,FMOD,GABRD,GP2,GRID1,GRIK3,GZMB,HAPLN3,HERC5,HS3ST3A1,HSD17B13,HSP90AA1,IL18BP,INSRR,IQSEC3,KANK4,KCNN1,KDELR3,KIRREL3,LRFN1,LRRC4,MAML3,MANF,MASP1,MISP,MMP7,MOV10L1,MOX…	104
Cell-To-Cell Signaling and Interaction,Inflammatory Response	immune response	Immune response of macrophages	0.000145	0.00399		0.733	0.443	ALOX15,ANXA1,C3,CCL22,CLEC6A,IFNG,NTN1,PGLYRP1,PTX3,RORA,TREM2,VTN,XBP1	13
Cell Death and Survival,Organismal Injury and Abnormalities,Renal and Urological Disease	cell death	Cell death of kidney cells	0.000146	0.00399		-0.311	-0.486	APOE,BAK1,BCL6,CCNB1,DDN,EIF2AK2,F2,HK2,HSPA5,IFNG,IRF4,NAMPT,NPHS1,NTN1,NTRK3,PTGS2,SMAD7,SRXN1,STRA6,TNFSF10,VTN,ZBP1	22
Cellular Movement	migration	Migration of tumor cell lines	0.000147	0.004	Increased	2.685	2.223	ANXA1,ANXA2,C1QBP,CCL17,CCL19,CCL22,CCR4,CTSL,CXCL10,CXCL11,DUSP5,EIF2AK2,F2,FAIM2,GZMB,HAS2,HSP90AA1,IFNG,LAMB3,MMP7,MOV10L1,MST1R,NTN1,NTRK3,OSM,PHB,PTGS2,PTPRH,S100A11,SDC1,SDC3,SEMA3C,SERPINF1,SLC16A1,SOCS3,TGFA,THBS2,TNFSF10,TRPM8,TXN,VCAN,VTN,XCL1	43
Cellular Movement,Hematological System Development and Function,Hypersensitivity Response,Immune Cell Trafficking	cell movement	Cell movement of eosinophils	0.000148	0.00402		0.744	0.482	C3,CCL17,CCL19,CXCL10,CXCL11,FABP4,IFNG,OSM,SCG2,TXN	10
Gastrointestinal Disease,Inflammatory Disease	inflammatory bowel disease	Inflammatory Bowel Disease	0.000148	0.00402		1.131	1.286	ABCB1,ANK1,ANXA1,ASPHD2,C16orf45,CCL17,CCR4,COL1A1,COL1A2,CXCL10,GABRD,IFNG,LBP,PTGS2,RET,RTKN2,SMAD7,SOCS3,STRA6,TF,TRAM2,TRPM8,UBA7,XBP1	24
Carbohydrate Metabolism,Small Molecule Biochemistry	synthesis	Synthesis of glycosaminoglycan	0.000148	0.00402				B3GNT7,CEMIP,CHST1,CXCL10,FMOD,GPC2,HAS2,HS3ST3A1,SDC1,SDC3,VCAN	11
Cellular Assembly and Organization,Cellular Function and Maintenance	organization	Organization of cytoplasm	0.00015	0.00405		1.775	1.172	ACHE,ADAMTS4,ALOX15,ANXA1,APOE,BCL6,BHLHA15,C16orf45,C1QBP,C3,CCKAR,CCL19,CCNA2,CCNB1,CDC20,CDC6,CDH10,CKAP4,CNTN1,COL1A1,CUX2,CXCL10,DNER,F2,FKBP4,GFRA2,GZMB,HAS2,HSP90AA1,IFNG,INSRR,KIRREL3,LIF,LMAN1,LRRC4,MMP7,MOG,MST1R,MTFR2,MYBPH,MYH7B,MYO5B,NPHS1,NPY,NTMT1,NTN1,NTRK3,OSM,PAK5,PHB,PKHD1,PTGS2,PTX3,PVALB,REM1,RET,RIMS3,S100A11,SDC3,SERPINF1,SRGAP3,STIP1,STMN2,SYN1,TF,TNFSF10,TPBG,TREM2,TUBB3,…	70
Cellular Development,Cellular Growth and Proliferation,Organ Development,Skeletal and Muscular System Development and Function,Tissue Development	proliferation	Proliferation of muscle cells	0.00015	0.00405		-0.248	-0.431	ALOX15,APOD,APOE,CCNE1,COL1A1,CXCL10,F2,FST,HAS2,HSPD1,IFNG,LIF,MMP7,NAMPT,ORC1,OSM,PTGS2,SOCS3,TBX20,TNFSF10,TXN,VCAN,VTN	23
Cancer,Organismal Injury and Abnormalities	genitourinary carcinoma	Genitourinary carcinoma	0.000153	0.00411				ABCB1,ACHE,ADAMTS4,ADAMTS5,AGBL3,AICDA,AK2,ALDH18A1,ALOX15,ALPK3,ANK1,ANXA1,ANXA2,APOD,APOE,ASGR2,ATP2A1,BCL6,BHLHA15,BTNL9,C3,C6,CA8,CCKAR,CCNA2,CCNB1,CCNE1,CCR4,CCT5,CCT6A,CDC20,CDC25A,CDC25C,CDC6,CDH10,CDT1,CENPP,CKAP4,CLDN11,CLDN3,CLEC4A,CLEC4F,CNN1,CNTN1,COL1A1,COL1A2,COL4A1,COL4A6,CPAMD8,CPNE7,CTSL,CTXN3,CUX2,CXCL10,CXCL11,CYP1A1,DDO,DEPDC1B,DLGAP1,DLGAP3,DNER,DSC1,DSCAML1,DUSP26,DUSP5,E2F7…	217
Inflammatory Disease,Inflammatory Response,Neurological Disease,Organismal Injury and Abnormalities	encephalitis	Encephalitis	0.000154	0.00415		-0.833	-0.923	BCL6,C3,C6,CCR4,CLEC4E,CXCL10,HLA-DQB1,HSPA5,IFNG,IL12RB2,IL18BP,IL27,IRF4,LIF,MOG,NPY,RORA,SDC1,TBX21,TGFA,TNFSF10,TREM2,XBP1	23
Dermatological Diseases and Conditions,Organismal Injury and Abnormalities	loss	Loss of hair	0.000157	0.00421		1.977	2.336	ANXA1,APOE,CXCL10,CXCL11,DLGAP3,DSC1,HR,IFNG,PTGS2,SNAP25,TGFA	11
Cancer,Dermatological Diseases and Conditions,Hematological Disease,Immunological Disease,Organismal Injury and Abnormalities	cutaneous T-cell lymphoma	Cutaneous T-cell lymphoma	0.000158	0.00422				ANXA1,BAK1,CCL8,CCR4,CXCL10,CXCL11,OAS1,OAS2,TNFRSF8,TUBB3	10
Cell Signaling	cell surface receptor linked signal transduction	Cell surface receptor linked signal transduction	0.000163	0.00435				ADAMTS1,ALOX15,ANXA1,BCL6,CCL19,CCL22,COL1A2,CXCL10,GFRA2,GFRA3,GPC2,HSP90AA1,IRF4,LBP,LIF,NTRK3,OSM,PTGS2,RET,RORA,SDC1,SOCS3,STX1A	23
Cancer,Hematological Disease,Immunological Disease,Organismal Injury and Abnormalities	lymphocytic cancer	Lymphocytic cancer	0.000164	0.00438		-1.977	-1.86	ACHE,AICDA,ANXA1,ANXA2,BAG2,BAK1,BCL6,BCL7A,C3,CCDC86,CCL17,CCL19,CCL22,CCL8,CCNA2,CCNB1,CCR4,CDC20,CDH10,COL1A1,COL1A2,COL4A1,CTSL,CXCL10,CXCL11,CYP1A1,DLGAP3,DNER,DUSP5,E2F7,F2,FRZB,GRIK3,GZMB,HK2,HSP90AA1,HSPA12A,HSPA5,IFIT3,IFNG,IL12RB2,IRF4,JCHAIN,LIF,MEF2B,MST1R,MTHFD1L,MYO5B,NAMPT,NTRK3,OAS1,OAS2,POLQ,PTGES2,PTGS2,RET,SDC1,SEC24D,SERPINF1,SERPINH1,SHMT2,SLAMF8,SLC16A1,SMAD7,SORD,STIP1,STMN…	76
Humoral Immune Response,Protein Synthesis	quantity	Quantity of IgM	0.000166	0.00442		1.27	1.298	ABCB1,AICDA,APOE,BCL6,HLA-DQB1,IFNG,IRF4,JCHAIN,POLQ,PTGS2,TBX21	11
Inflammatory Disease,Inflammatory Response,Organismal Injury and Abnormalities,Respiratory Disease	inflammation	Inflammation of lung	0.000167	0.00443		0.428	0.584	ANXA1,APOE,BCL6,C3,CCL17,CCL22,CCR4,CXCL11,F2,GZMA,GZMB,HSPA5,IFNG,LBP,OSM,P4HB,PTGS2,RET,RORA,RTKN2,SDC1,SHMT2,TGFA,THBS2,TK1,TNFSF10	26
Cancer,Organismal Injury and Abnormalities	pelvic cancer	Pelvic cancer	0.000168	0.00446				ABCB1,ADAMTS4,ADAMTS5,AGBL3,AICDA,AK2,ALDH18A1,ALOX15,ALPK3,ALPL,ANK1,ANXA1,ANXA2,APOD,APOE,ART5,ASGR2,ATP2A1,BCL6,BHLHA15,BTNL9,C16orf45,C3,C6,CA8,CCKAR,CCNA2,CCNB1,CCNE1,CCR4,CCT5,CCT6A,CDC20,CDC25A,CDC25C,CDC6,CDH10,CDT1,CENPP,CKAP4,CLDN11,CLDN3,CLEC4A,CLEC4F,CNN1,CNTN1,COL1A1,COL1A2,COL4A1,COL4A6,CPAMD8,CPNE7,CTSL,CUX2,CXCL10,CXCL11,CYP1A1,DDO,DEPDC1B,DLGAP1,DLGAP3,DNER,DSC1,DSCAML1,DUSP26,DU…	222
Cell Morphology,Nervous System Development and Function	morphology	Morphology of central nervous system cells	0.000172	0.00454				ACHE,ADAMTS4,ANXA1,CCR10,CNTN1,FAIM2,GFRA2,LIF,NTRK3,PVALB,SLC1A2,SNTA1,SYN1,TGFA	14
Cancer,Endocrine System Disorders,Gastrointestinal Disease,Organismal Injury and Abnormalities	carcinoma	Pancreatic carcinoma	0.000173	0.00454				ADAMTS5,AICDA,ALPL,ANK1,ANXA1,BPIFB3,C1QBP,CCL22,CCR10,CDH10,CMPK2,CNTN1,COL1A1,COL1A2,COL4A1,COL4A6,CPNE7,CTHRC1,CXCL10,DLGAP1,DLGAP3,DMP1,DNER,DSCAML1,EDIL3,EIF2AK2,ELL2,F2,FANCI,FIBIN,FKBP14,FMOD,GP2,GRID1,GRIK3,GZMB,HAPLN3,HERC5,HS3ST3A1,HSP90AA1,IL18BP,INSRR,KANK4,KCNN1,KDELR3,KIRREL3,LRFN1,LRRC4,MAML3,MANF,MASP1,MISP,MMP7,MOV10L1,MOXD1,MYO5B,NMUR1,NTRK3,P2RY1,PDK4,PKHD1,POLQ,PTGS2,PVALB,RET…	88
Cancer,Endocrine System Disorders,Organismal Injury and Abnormalities,Reproductive System Disease	pituitary gland tumor	Pituitary gland tumor	0.000176	0.00463				ACHE,ANXA2,C3,CCNE1,FABP4,FRZB,IFNG,LAMB3,RNASE1,SFRP2,STX1A,TGFA,VTN	13
Cell Cycle	interphase	Interphase of epithelial cell lines	0.000177	0.00465				ALOX15,ANXA2,CCNB1,CCNE1,CDC25C,CDC6,MCM10	7
Cell Morphology	sprouting	Sprouting	0.000182	0.00477		-0.084	-0.399	ADAMTS1,ADAMTS4,ANXA1,ANXA2,APOE,C3,CCL19,CDH10,IFNG,LRRC4,MOG,MYH7B,MYO5B,NPY,NTN1,NTRK3,PTGS2,PVALB,REM1,RET,RIMS3,SERPINF1,SRGAP3,TGFA,TPBG	25
Cellular Growth and Proliferation,Connective Tissue Development and Function,Tissue Development	proliferation	Proliferation of synovial cells	0.000188	0.00484		0.609	0.336	F2,LIF,OSM,SOCS3,TNFSF10,VTN	6
Cellular Assembly and Organization,Tissue Development	formation	Formation of fibrils	0.000188	0.00484		-0.246	-0.287	APOE,CTSL,FMOD,HSPA5,PTGS2,SERPINH1	6
Cellular Movement,Hematological System Development and Function,Immune Cell Trafficking,Inflammatory Response	cell movement	Cell movement of monocyte-derived dendritic cells	0.000188	0.00484		-0.562	-0.966	CCL19,CCL22,CXCL10,CXCL11,IFNG,NPY	6
Lipid Metabolism,Small Molecule Biochemistry	synthesis	Synthesis of 12-hydroxyeicosatetraenoic acid	0.000188	0.00484		-0.485	-0.844	ALOX15,F2,IFNG,NTN1	4
Cell-To-Cell Signaling and Interaction,Skeletal and Muscular System Development and Function	binding	Binding of vascular smooth muscle cells	0.000188	0.00484				ALOX15,CKAP4,IFNG,VTN	4
Small Molecule Biochemistry	quantity	Quantity of hydroxyproline	0.000188	0.00484		1.981	1.81	CXCL10,IL27,SMAD7,TGFA	4
Cancer,Hematological Disease,Immunological Disease,Organismal Injury and Abnormalities	mature B-cell neoplasm	Mature B-cell neoplasm	0.000188	0.00484				ABCB1,AICDA,ALPL,ANXA1,ANXA2,APOE,BAK1,BCL6,BCL7A,CCDC86,CCL17,CCNB1,CDC20,CDH10,CLEC4A,COL1A1,COL1A2,CTSL,CXCL11,DLGAP3,DNER,E2F7,FRZB,GRIK3,HCAR3,HSP90AA1,HSPA12A,IFIT3,IFNG,IL12RB2,IRF4,JCHAIN,MEF2B,MTHFD1L,MYO5B,NAMPT,POLQ,PTGES2,PTGS2,RET,SDC1,SEC24D,SHMT2,SLC16A1,SMAD7,STIP1,STMN2,TBX21,TENT5C,TF,THBS2,TNFRSF8,TRAM2,TUBB3,VCAN,VTN,XBP1	57
Cell Death and Survival	apoptosis	Apoptosis of tumor cell lines	0.00019	0.00488		-1.092	-0.964	ABCB1,ALOX15,ANXA2,APOE,ATP2A1,BAK1,BCL6,CCNB1,CCNE1,CDC20,CDC25A,CDC6,CKS2,COL1A1,COL4A1,EIF2AK2,FAIM2,FST,GZMB,HK2,HLA-DQB1,HSPA5,HSPD1,IFNG,IRF4,LARP1B,LIF,MANF,MCM10,MMP7,MST1R,MYBL1,NR3C2,NTN1,NTRK3,NUPR1,OSM,P4HB,PHB,PTGS2,RET,RNASE1,S100A11,SDC1,SERPINF1,SFRP2,SMAD7,SOCS3,TCP1,TF,TGFA,TNFRSF8,TNFSF10,TXN,UBA7,VCAN,VNN1,VTN,XBP1	59
Gastrointestinal Disease,Inflammatory Disease,Inflammatory Response,Organismal Injury and Abnormalities	experimental colitis	Experimental colitis	0.000192	0.00491		-1.387	-1.244	C3,IFNG,LBP,PHB,SMAD7,SOCS3,TBX21,TRPM8,XBP1	9
Cardiovascular Disease,Organismal Injury and Abnormalities	atherosclerotic lesion	Atherosclerotic lesion	0.000193	0.00495		0.142	0.108	ALOX15,APOE,CXCL10,FABP4,GZMB,IFNG,NR3C2,PTX3,SOCS3,TNFSF10,TREM2,VCAN,VNN1	13
Cell-To-Cell Signaling and Interaction,Cellular Function and Maintenance,Hematological System Development and Function,Inflammatory Response	phagocytosis	Phagocytosis of neutrophils	0.000196	0.005		1.227	0.939	C3,CLEC6A,CXCL10,IFNG,PTX3,TREM2,VTN	7
Cancer,Endocrine System Disorders,Gastrointestinal Disease,Organismal Injury and Abnormalities	pancreatic adenocarcinoma	Pancreatic adenocarcinoma	0.0002	0.0051				ADAMTS5,AICDA,ALPL,ANK1,ANXA1,BPIFB3,C1QBP,CCL22,CCR10,CDH10,CMPK2,CNTN1,COL1A1,COL1A2,COL4A1,COL4A6,CPNE7,CTHRC1,CXCL10,DLGAP1,DLGAP3,DMP1,DNER,DSCAML1,EIF2AK2,ELL2,F2,FANCI,FIBIN,FKBP14,FMOD,GP2,GRIK3,GZMB,HAPLN3,HERC5,HS3ST3A1,HSP90AA1,INSRR,KANK4,KCNN1,KDELR3,KIRREL3,LRFN1,LRRC4,MAML3,MANF,MASP1,MISP,MMP7,MOV10L1,MOXD1,MYO5B,NMUR1,NTRK3,P2RY1,PDK4,PKHD1,POLQ,PTGS2,PVALB,RET,RIMBP2,RORA,SDC1,S…	84
Carbohydrate Metabolism	synthesis	Synthesis of carbohydrate	0.000202	0.00514		0.23	-0.128	ACHE,ALOX15,ANXA1,APOE,B3GNT7,CEMIP,CHST1,CXCL10,F2,FABP4,FMOD,GFPT2,GMPPB,GPC2,HAS2,HS3ST3A1,MFSD2A,NPY,NTRK3,PPA1,RORA,S100A11,SDC1,SDC3,SOCS3,SORD,TKTL1,VCAN,XBP1	29
Cell Death and Survival	apoptosis	Apoptosis of leukocytes	0.000203	0.00516	Increased	2.956	3.062	ANXA1,APOE,BAK1,BCL6,CCDC86,CCL19,CCNB1,COL1A1,DUSP5,EIF2AK2,F2,GP2,GZMA,GZMB,IFNG,IL27,IRF4,MOG,NAMPT,SERPINF1,SMAD7,THBS2,TNFRSF8,TNFSF10,TREM2,XCL1	26
Neurological Disease,Organismal Injury and Abnormalities	damage	Damage of nervous tissue	0.000206	0.0052		0.563	0.765	ACHE,FAIM2,IFNG,MOG,PTGS2,SLC1A2,SOCS3,TF,TNFSF10	9
Cancer,Gastrointestinal Disease,Hepatic System Disease,Organismal Injury and Abnormalities	hepatobiliary system cancer	Hepatobiliary system cancer	0.000207	0.00524		1.34	1.411	ADAMTS1,ADAMTS4,ADAMTS5,AICDA,AK2,ALPL,ANK1,ANXA1,ANXA2,APOE,B3GNT7,BAG2,BCL6,BTNL9,C3,CCL19,CCNA2,CCNB1,CCNE1,CCR10,CCT6A,CDC20,CDC6,CDH10,CELA1,CENPP,CKS2,CLEC4A,CNN1,CNTN1,COL1A1,COL1A2,COL4A1,COL4A6,CPAMD8,CTHRC1,CUX2,CXCL10,CYP1A1,DCTPP1,DDO,DLGAP1,DLGAP3,DMP1,DPEP2,DSC1,DSCAML1,E2F7,EDIL3,EIF2AK2,ELL2,ELL3,F2,FAM131B,FAM155A,FAM170B,FANCI,FBP2,GABRD,GPC2,GPR75,GRIK3,GRIK4,GZMB,HEPACAM,HK2,H…	165
Cell Signaling,Molecular Transport,Vitamin and Mineral Metabolism	transport	Transport of Ca2+	0.000208	0.00524	Decreased	-2	-2.222	ATP2A1,BHLHA15,CCL8,CXCL10,F2,FGF23,NMUR1,NMUR2,NPY,PHB,TRPM8	11
Cell Death and Survival	cell death	Cell death of lymphocytes	0.000208	0.00524	Increased	2.246	2.37	APOE,BAK1,CCDC86,CCL19,CCNB1,CLEC10A,COL1A1,CXCL10,DRAM1,DUSP5,EIF2AK2,GP2,GZMA,GZMB,IFNG,IL27,IRF4,MOG,SMAD7,TBX21,THBS2,TNFSF10,XCL1	23
Behavior	cognition	Cognition	0.000213	0.00534		-0.089	-0.344	Aff2,APOD,APOE,C3,CUX2,DDO,EIF2AK2,GABRD,LHX8,LYPD1,MCHR1,NAMPT,NPY,NR3C2,Nrgn,NTRK3,P2RY1,PAK5,PTGS2,SERPINF1,SNAP25,SRGAP3,STRA6,STX1A,TGFA,TPBG,TRPM8	27
Cell-To-Cell Signaling and Interaction,Cellular Movement,Hematological System Development and Function,Immune Cell Trafficking,Inflammatory Response	recruitment	Recruitment of phagocytes	0.000218	0.00541		0.724	0.365	ALOX15,ANXA1,APOE,CCL19,CCL22,CLEC10A,CLEC4E,CXCL10,CYP1A1,EDIL3,IFNG,LIF,MOG,NTN1,OSM,PTX3,THBS2	17
Cancer,Organismal Injury and Abnormalities,Reproductive System Disease	genital tract cancer	Genital tract cancer	0.000219	0.00541				ABCB1,ACHE,ADAMTS4,ADAMTS5,AGBL3,ALDH18A1,ALOX15,ALPK3,ALPL,ANK1,ANXA1,ANXA2,APOD,APOE,ASGR2,ATP2A1,BCL6,BHLHA15,BTNL9,C16orf45,C3,C6,CA8,CCKAR,CCNA2,CCNB1,CCNE1,CCR4,CCT5,CCT6A,CDC20,CDC25A,CDC25C,CDC6,CDH10,CENPP,CKAP4,CLDN11,CLDN3,CLEC4A,CLEC4F,CNN1,CNTN1,COL1A1,COL1A2,COL4A1,COL4A6,CPAMD8,CPNE7,CTSL,CUX2,CXCL10,CXCL11,CYP1A1,DDO,DEPDC1B,DLGAP1,DLGAP3,DNER,DSCAML1,DUSP26,DUSP5,E2F7,EDEM3,EDIL3…	209
Molecular Transport	quantity	Quantity of 5,6,7,8-tetrahydrobiopterin	0.000219	0.00541				APOE,IFNG,SPR	3
Connective Tissue Disorders,Dermatological Diseases and Conditions,Developmental Disorder,Hereditary Disorder,Metabolic Disease,Organismal Injury and Abnormalities,Skeletal and Muscular Disorders	Ehlers-Danlos syndrome type VII	Ehlers-Danlos syndrome type VII	0.000219	0.00541				ADAMTS4,COL1A1,COL1A2	3
Cell-To-Cell Signaling and Interaction	activation	Activation of macrophage cancer cell lines	0.000219	0.00541				F2,IFNG,ZBP1	3
Cell Death and Survival	killing	Killing of lung cancer cell lines	0.000219	0.00541				IFNG,SERPINF1,TNFSF10	3
Cell-mediated Immune Response,Cell-To-Cell Signaling and Interaction,Cellular Movement,Hematological System Development and Function,Immune Cell Trafficking	recruitment	Recruitment of Th2 cells	0.000219	0.00541				CCL17,CCL22,CCR4	3
Cell-To-Cell Signaling and Interaction,Inflammatory Response	immune response	Immune response of T lymphocytes	0.00022	0.00542		0.912	0.726	APOE,BAK1,GZMB,HLA-DQB1,IFNG,NAMPT,RET,SLC1A5,SOCS3,TBX21,VTN	11
Cell Morphology,Cell-To-Cell Signaling and Interaction,Cellular Assembly and Organization	morphology	Morphology of intercellular junctions	0.00022	0.00542				APOE,C3,CDH10,CLDN1,CLDN11,IFNG,RET,SNTA1,STIP1,STX1A,UNC13A	11
Cancer,Organismal Injury and Abnormalities,Reproductive System Disease	HER2 negative hormone receptor negative breast cancer	HER2 negative hormone receptor negative breast cancer	0.000222	0.00545				ABCB1,BCL6,CYP1A1,FRZB,HSP90AA1,LIF,NTRK3,PTGS2,RET,TF,TGFA,TNFSF10,TUBB3	13
Cancer,Gastrointestinal Disease,Organismal Injury and Abnormalities	hepatobiliary carcinoma	Hepatobiliary carcinoma	0.00023	0.00563		1.116	1.213	ADAMTS1,ADAMTS4,ADAMTS5,AICDA,AK2,ALPL,ANK1,ANXA1,ANXA2,APOE,B3GNT7,BAG2,BTNL9,C3,CCL19,CCNA2,CCNB1,CCNE1,CCR10,CCT6A,CDC20,CDC6,CDH10,CELA1,CENPP,CKS2,CLEC4A,CNN1,CNTN1,COL1A1,COL1A2,COL4A1,COL4A6,CPAMD8,CTHRC1,CUX2,CXCL10,DCTPP1,DDO,DLGAP1,DLGAP3,DMP1,DPEP2,DSC1,DSCAML1,E2F7,EDIL3,EIF2AK2,ELL2,ELL3,F2,FAM131B,FAM155A,FAM170B,FANCI,FBP2,GABRD,GPC2,GPR75,GRIK3,GRIK4,GZMB,HEPACAM,HK2,HPCAL4,HR,HSP…	160
Nervous System Development and Function,Tissue Morphology	quantity	Quantity of central nervous system cells	0.000233	0.00569		0.506	0.28	ACHE,ANXA1,APOE,CCKAR,FST,IFNG,LIF,NTN1,NTRK3,RORA,SERPINF1,TGFA	12
Cellular Development,Cellular Growth and Proliferation,Organ Development,Skeletal and Muscular System Development and Function,Tissue Development	proliferation	Proliferation of smooth muscle cells	0.000234	0.00572		0.327	0.155	ALOX15,APOD,APOE,CCNE1,COL1A1,F2,HAS2,HSPD1,IFNG,NAMPT,ORC1,OSM,PTGS2,SOCS3,TNFSF10,TXN,VCAN,VTN	18
Cell Cycle	cell cycle progression	Cell cycle progression	0.000235	0.00574	Increased	2.049	1.786	APOE,BAK1,BCL6,C1QBP,CCNA2,CCNB1,CCNE1,CDC20,CDC25A,CDC25C,CDC6,CDT1,CENPW,COL1A1,CXCL10,DMP1,DTL,EIF2AK2,F2,FAM72A,HAS2,HERC5,IFNG,LIF,MMS22L,MOV10L1,MX2,NTRK3,NUPR1,OSM,PHB,PTGS2,PTX3,RET,SDC3,SKA1,SKA3,SMAD7,SOCS3,TCP1,TF,TGFA,TNFSF10,TOR2A,TUBB3,TXN,UBA7,UBE2S,VCAN,XBP1	50
Cancer,Organismal Injury and Abnormalities	carcinoma	Invasive carcinoma	0.000236	0.00575				ADAMTS1,ADAMTS4,ADAMTS5,ANXA1,APOD,CDC6,CNN1,COL1A2,CXCL10,E2F7,FABP4,GABRD,HSP90AA1,MCM2,PDK4,POLQ,PTGS2,PYCR1,RET,SKA3,TGFA,TUBB3	22
Carbohydrate Metabolism,Drug Metabolism,Molecular Transport,Small Molecule Biochemistry	quantity	Quantity of hyaluronic acid	0.000242	0.00588		1	0.877	APOE,C1QBP,HAS2,OSM	4
Cardiovascular Disease,Organismal Injury and Abnormalities	acute coronary syndrome	Acute coronary syndrome	0.000243	0.00588				ABCB1,APOE,C3,F2,FABP3,GABRD,IFNG,NR3C2,P2RY1,PTGS2,PTX3,TOR2A,TUBB3	13
Cell-To-Cell Signaling and Interaction,Cellular Movement,Hematological System Development and Function,Immune Cell Trafficking	recruitment	Recruitment of granulocytes	0.000243	0.00588		0.46	0.165	ALOX15,ANXA1,APOE,C3,CCL19,CCL22,CLEC10A,CLEC4E,CXCL10,CYP1A1,EDIL3,IFNG,LIF,NTN1,PTX3	15
DNA Replication, Recombination, and Repair,Nucleic Acid Metabolism,Small Molecule Biochemistry	hydrolysis	Hydrolysis of nucleotide	0.000244	0.00588		1.154	0.703	ALPL,ART5,CCT5,CDC6,ENTPD2,F2,HSPA5,HSPD1,P2RY1,STMN2	10
Free Radical Scavenging	metabolism	Metabolism of reactive oxygen species	0.000247	0.00594		0.424	0.163	ABCB1,ACHE,ANXA1,ANXA2,APOE,BAK1,C3,CYP1A1,F2,FGF23,GZMA,GZMB,HAS2,HK2,IFNG,LIF,NAMPT,NPY,NR3C2,PHB,PTGS2,RORA,SERPINF1,SOCS3,TF,TGFA,TXN,XBP1	28
Organismal Injury and Abnormalities	fibrosis	Fibrosis	0.000247	0.00594		1.408	1.549	APOE,BCL6,C3,CCL17,COL1A1,COL1A2,CXCL11,HAS2,IFNG,LIF,MMP7,NAMPT,NR3C2,OSM,P2RY1,PHB,PKHD1,PTGS2,PTX3,RET,RORA,RTKN2,SDC3,SHMT2,SMAD7,SOCS3,SYT7,TGFA,THBS2,TNFSF10,VTN,XBP1	32
Cardiovascular Disease,Hereditary Disorder,Neurological Disease,Organismal Injury and Abnormalities	ischemic stroke	Ischemic stroke	0.000253	0.00604				ACHE,BCL6,CKAP4,F2,GABRD,P2RY1,PTGS2,SLC16A6,THBS2	9
Carbohydrate Metabolism	synthesis	Synthesis of polysaccharide	0.000253	0.00604		-0.628	-0.809	APOE,B3GNT7,CEMIP,CHST1,CXCL10,FMOD,GPC2,HAS2,HS3ST3A1,NTRK3,S100A11,SDC1,SDC3,SOCS3,VCAN	15
Cellular Development,Cellular Growth and Proliferation,Nervous System Development and Function,Tissue Development	development	Development of neurons	0.000254	0.00604		0.275	-0.141	ACHE,ADAMTS4,APOE,C3,CCKAR,CCL19,CDC20,CDH10,CNTN1,COL4A1,CUX2,DLGAP3,DNER,FAIM2,GFRA2,GFRA3,HSP90AA1,IFNG,KIRREL3,LHX8,LIF,LRRC4,MOG,MYH7B,MYO5B,NTN1,NTRK3,PTGS2,PVALB,RET,RIMS3,SERPINF1,SNTA1,SPR,SRGAP3,STIP1,SYN1,THBS2,TPBG,UNC13A,XBP1	41
Cellular Movement,Hematological System Development and Function,Immune Cell Trafficking	cellular infiltration	Cellular infiltration by lymphocytes	0.000254	0.00604		0.653	0.529	C3,C6,CCL19,CCL22,CCR4,CXCL10,IFNG,IL18BP,MOG,PTGS2,TNFRSF8,TNFSF10,XCL1	13
Lipid Metabolism,Small Molecule Biochemistry	synthesis	Synthesis of prostaglandin	0.000254	0.00604		1.419	1.032	ANXA1,APOE,F2,IFNG,IL27,NTN1,OSM,PLA2G4F,PTGES2,PTGS2,TGFA,TNFSF10,VTN	13
Cell Cycle	interphase	Interphase	0.000257	0.00609		-0.481	-0.665	ABCB1,ALOX15,ANXA2,APOE,BAK1,CCNA2,CCNB1,CCNE1,CDC20,CDC25A,CDC25C,CDC6,CDT1,CKS2,DTL,EIF2AK2,F2,HAS2,HASPIN,HSP90AA1,IFNG,LIF,MCM10,MCM2,MMS22L,MST1R,MX2,MYBL1,ORC1,OSM,PTGS2,SDC3,SLC13A5,SMAD7,TCP1,TF,TGFA,TNFRSF8	38
Cell-To-Cell Signaling and Interaction	aggregation	Aggregation of cells	0.000258	0.0061		-1.077	-1.403	C3,CCL17,CCL22,CCR4,CXCL10,F2,MMP7,MST1R,NPHS1,NTN1,P2RY1,P4HB,PHB,PTGS2,PTX3,RET,SERPINF1,THBS2,TNFRSF8,VTN	20
Cellular Movement,Hematological System Development and Function,Immune Cell Trafficking,Inflammatory Response	migration	Migration of dendritic cells	0.000259	0.00611		-0.323	-0.654	APOE,C3,CCL17,CCL19,CCL22,CXCL10,CXCL11,IFNG,NPY,SCG2	10
Cell-To-Cell Signaling and Interaction,Cellular Function and Maintenance,Hematological System Development and Function,Inflammatory Response	phagocytosis	Phagocytosis by macrophages	0.000273	0.00644		0.918	0.592	ALOX15,ANXA1,C3,CLEC6A,IFNG,PGLYRP1,PTX3,RORA,TREM2,VTN,XBP1	11
Cancer,Organismal Injury and Abnormalities	mesenchymal tumor	Mesenchymal tumor	0.000278	0.00654				ABCB1,CCNE1,COL1A1,COL1A2,COL4A1,COL4A6,IFNG,MST1R,NTRK3,PTGS2,RET,TUBB3,TXN	13
Cellular Development,Cellular Growth and Proliferation,Hematological System Development and Function,Lymphoid Tissue Structure and Development	cell proliferation	Cell proliferation of T lymphocytes	0.000279	0.00656		0.161	-0.065	ANXA1,APOE,BTNL9,C1QBP,C3,CCL17,CCL19,CCL22,CDC25A,CLEC10A,DUSP5,EIF2AK2,FABP4,GP2,HLA-DQB1,HR,HSPA5,HSPD1,IFNG,IL12RB2,IL27,IRF4,MOG,NPY,OSM,PTGS2,SOCS3,TBX21,TNFSF10,TXN,XCL1,ZBTB32	32
Hematological System Development and Function	hemostasis	Hemostasis	0.000282	0.0066		-1.029	-1.203	ABCB1,ANXA2,APOE,ASGR2,C1QBP,C3,CCL17,CCL22,COL1A1,COL1A2,ENTPD2,F2,GZMB,LMAN1,P2RY1,PTGS2,SERPINF1,THBS2,VCAN,VTN	20
Cancer,Hematological Disease,Immunological Disease,Organismal Injury and Abnormalities	plasma cell dyscrasia	Plasma cell dyscrasia	0.000284	0.00665				ABCB1,ALPL,ANXA2,APOE,BCL6,CCL17,CCNB1,CDC20,CLEC4A,CTSL,HCAR3,HSP90AA1,IFIT3,IFNG,IL12RB2,IRF4,JCHAIN,PTGS2,RET,SDC1,SMAD7,STIP1,TENT5C,TF,TUBB3,XBP1	26
